# Sleep, Anesthesiology, and the Neurobiology of Arousal State Control

Ralph Lydic, Ph.D.,\* Helen A. Baghdoyan, Ph.D.\*

Sleep, like breathing, is a biologic rhythm that is actively generated by the brain. Neuronal networks that have evolved to regulate naturally occurring sleep preferentially modulate traits that define states of sedation and anesthesia. Sleep is temporally organized into distinct stages that are characterized by a unique constellation of physiologic and behavioral traits. Sleep and anesthetic susceptibility are genetically modulated, heritable phenotypes. This review considers 40 yr of research regarding the cellular and molecular mechanisms contributing to arousal state control. Clinical and preclinical data have debunked and supplanted the primitive view that sleep need is a weakness. Sleep deprivation and restriction diminish vigilance, alter neuroendocrine control, and negatively impact immune function. There is overwhelming support for the view that decrements in vigilance can negatively impact performance. Advances in neuroscience provide a foundation for the sea change in public and legal perspectives that now regard a sleep-deprived individual as impaired.

ANESTHESIOLOGY has a major stake in understanding the impact of sleep on clinical performance and career sustainability.<sup>1-9</sup> Vigilance is part of the logo of the American Society of Anesthesiologists, and sleep deprivation impairs vigilance<sup>10</sup> and neurocognitive function.<sup>11</sup> There is overwhelming support for the view that decrements in vigilance can negatively impact performance.<sup>1,2,12-16</sup> Demanding call schedules, increasing numbers of patients, and a shortage of caregivers further reinforce the relevance of fatigue for medical practice. A growing body of human data suggest that recurrent sleep restriction can contribute to significant neuroendocrine disruption.<sup>17,18</sup> The publication by the U.S. Institute of Medicine,<sup>19</sup> attributing as many as 98,000 deaths per year to medical errors, has further encouraged efforts to understand the regulation of vigilance and management of fatigue.

The clinical significance of sleep-dependent changes in autonomic control<sup>20</sup> has contributed to the development

of sleep disorders medicine.<sup>21,22</sup> Advances in sleep medicine are being incorporated into anesthesiology practice.<sup>23-32</sup> The developing interaction between anesthesiology research and sleep research indicates the need for a review that highlights aspects of sleep neurobiology of particular relevance for anesthesiology. This article provides an update on the neurobiology of arousal state control by selectively reviewing (1) sleep phenomenology; (2) the regulation of arousal states by multiple brain regions; (3) the cholinergic model of rapid eye movement (REM) sleep; (4) the regulation of traits that define arousal states; and (5) neurochemical modulation of arousal states by acetylcholine, adenosine,  $\gamma$ -aminobutyric acid (GABA), monoamines, and hypocretin/orexin. The article concludes by identifying gaps in existing knowledge that provide opportunities for anesthesia research.

## Sleep Is Temporally Organized, Homeostatically Regulated, and Actively Generated by the Brain

In 1953, it was shown for the first time that humans have a unique phase of sleep during which the cortical electroencephalogram is activated. The Chicago laboratory responsible for this discovery also noted the presence of disjugate eye movements, for which this state was named rapid eye movement, or REM, sleep.<sup>33</sup> REM sleep accounts for approximately 20% of a normal night of sleep, whereas the remaining 80% is comprised of non-rapid eye movement (NREM) sleep. Sleep is not merely the passive loss of wakefulness. Sleep states are actively generated by the central nervous system (CNS). Sleep is homeostatically regulated and temporally organized into distinct phases. During a normal sleep interval, there is a regular and periodic oscillation between the REM and NREM phases. This periodicity also illustrates that sleep, similar to breathing, is actively generated by the nervous system. Sleep deprivation is normally followed by an increase in sleep. This rebound increase demonstrates the homeostatic regulation of sleep.<sup>34</sup>

Normal sleep exhibits a dynamic architecture, and that temporal organization must be preserved if sleep is to produce the subjective experience of being restful and refreshing.<sup>22,35</sup> Any number of physiologic signs could

\* Professor.

Received from the Department of Anesthesiology, University of Michigan, Ann Arbor, Michigan. Submitted for publication November 21, 2003. Accepted for publication May 11, 2005. Supported by grant Nos. HL40881, HL57120, MH45361, and HL65272 from the National Institutes of Health, Bethesda, Maryland, and the Department of Anesthesiology, University of Michigan, Ann Arbor, Michigan.

Address reprint requests to Dr. Lydic: University of Michigan, Department of Anesthesiology, 7433 Medical Sciences Building I, 1150 West Medical Center Drive, Ann Arbor, Michigan 48109-0615. Address electronic mail to: rlydic@umich.edu. Individual article reprints may be purchased through the Journal Web site, [www.anesthesiology.org](http://www.anesthesiology.org).

have been chosen to name the two major phases of sleep. For example, REM sleep also is characterized by the presence of an activated cortical electroencephalogram. The activated electroencephalogram is comprised of fast-frequency, low-amplitude waves. This activated electrographic pattern has given rise to descriptions of REM sleep as “active” sleep and to the NREM phase of sleep as “quiet” sleep. It is interesting to note that the cortical electroencephalogram during REM sleep is similar to the electroencephalogram of alert wakefulness. This similarity likely arises, in part, from cerebral metabolic and hemodynamic characteristics of REM sleep. Measures of cerebral blood flow and glucose utilization show that the brain is as metabolically active during REM sleep as it is during wakefulness.<sup>36–39</sup> This activation of the cortical electroencephalogram fits well with the fact that cognitive changes and the mental experience of dreaming occur during REM sleep.<sup>40</sup> To French investigators, the electroencephalographic similarity between wakefulness and REM sleep gave rise to the term *sommeil paradoxical*, or paradoxical sleep.<sup>41</sup> Therefore, the terms REM sleep, active sleep, and paradoxical sleep all refer to the same state. Human sleep is consolidated into bouts of 6–8 h.<sup>22,35</sup> The daily drive to sleep is modulated by the hypothalamic suprachiasmatic nuclei that coordinate circadian (24-h) rhythms. The time at which we experience the desire to sleep is regulated by both circadian and ultradian rhythms. Individuals who live to age 70 yr will have spent more than 20 yr sleeping. Mathematical and conceptual models of sleep cycle control have operationally defined this circadian modulation as *process C* and a homeostatic process, modeled by spectral analysis of the electroencephalogram, as *process S*.<sup>34</sup> During a normal night of sleep, the brain actively generates an ultradian (<< 24 h) rhythm of NREM and REM sleep. The human NREM-REM period duration is approximately every 90 min. Pioneering studies postulated that the NREM-REM cycle was generated, in part, by the interaction between cholinergic and monoaminergic neurons.<sup>42,43</sup> Subsequent mathematical and cellular models provided support for the view that the NREM-REM cycle resulted from the reciprocal interaction between cholinergic and monoaminergic neurons.<sup>44</sup> Much of research in sleep neurobiology continues to confirm, refute, and refine postulates of the reciprocal interaction model and the two-process model of sleep cycle control.<sup>45–47</sup> The emerging appreciation that sleep comprises a significant portion of the human condition continues to generate enthusiasm for efforts to understand the neurobiology of arousal state control.

### Multiple Brain Regions Generate Arousal States

For more than 20 yr, anesthesiologists have asserted that there is no single mechanism causing states of anesthesia.<sup>48</sup> There is now good agreement that a single

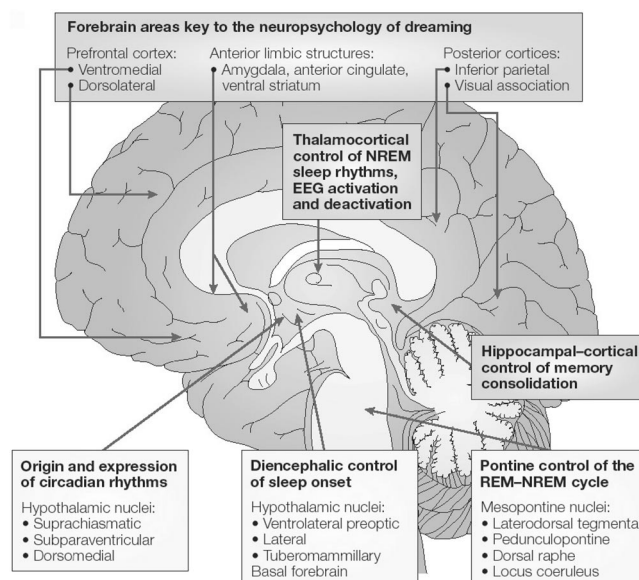

**Fig. 1.** Sagittal schematic drawing of the human brain illustrating regions that contribute to the regulation of sleep and wakefulness. The diagram emphasizes regulation of physiologic traits and arousal states by neural circuits that are distributed throughout the brain. EEG = electroencephalographic; REM = rapid eye movement; NREM = non-rapid eye movement. From Hobson and Pace-Schott;<sup>77</sup> used with permission from *Nature* (<http://www.nature.com/>).

mechanism of anesthetic action cannot account for the physiologic and behavioral traits used to define anesthetic states.<sup>49–52</sup> Anesthesia and sleep are different states sharing some remarkably similar physiologic and behavioral traits. As noted elsewhere,<sup>53</sup> anesthesia and sleep have so many trait similarities that patients are often told that anesthesia will put them to sleep. Sleep is a comforting metaphor<sup>54</sup> for an altered arousal state caused by toxic molecules, many of which have startling similarities between their ED<sub>50</sub> and their LD<sub>50</sub>. There is good agreement between clinical and preclinical research that spontaneously occurring states of arousal are generated by anatomically distributed and chemically heterogeneous neurons.<sup>22,35,52,55</sup> The hypothesis that neuronal networks which evolved to regulate naturally occurring sleep preferentially modulate traits that define states of sedation and anesthesia<sup>49,56,57</sup> has received consistent support.<sup>58–70</sup>

More than 150 yr of clinical neurology underlie the idea that specific neural functions are localized to specific brain regions.<sup>71</sup> Efforts to understand the mechanisms by which sleep and anesthesia eliminate wakefulness must confront the complexity that multiple brain regions contribute to the regulation of arousal states.<sup>55</sup> An overview of the multiple brain regions contributing to arousal state control is schematically illustrated in figure 1. Recent reviews provide detailed information and multiple perspectives regarding numerous brain regions regulating sleep and wakefulness.<sup>22,55,72–78</sup> The negative effects of sleep deprivation on performance and



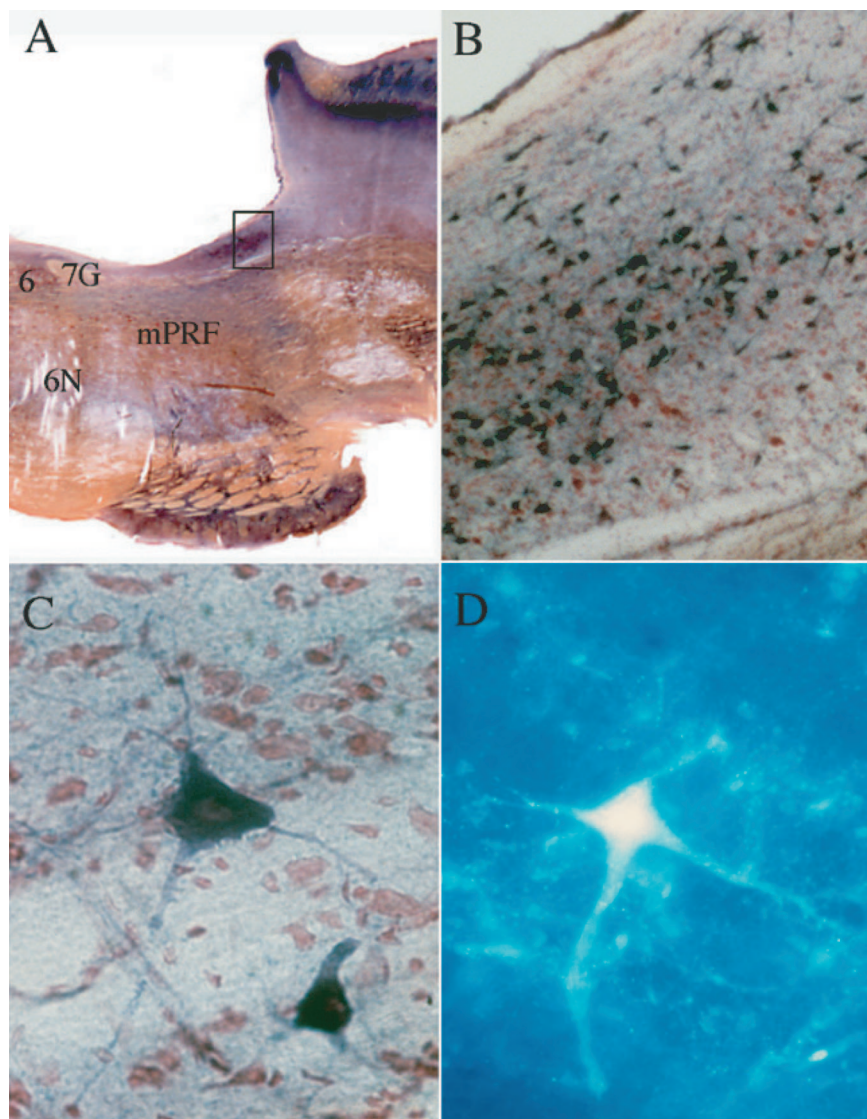

**Fig. 2.** Cholinergic and cholinceptive regions of the medial pontine reticular formation (mPRF) contribute to the regulation of sleep and wakefulness. (A) Sagittal view of cat pons. For orientation, this section identifies at the caudal (left) margin the abducens (6) nucleus and ventral to the genu of the facial nerve (7G), the sixth cranial nerve (6N). The mPRF corresponds, in part, to the gigantocellular tegmental field.<sup>480</sup> The mPRF contains muscarinic cholinergic receptors<sup>99,100,111</sup> and is therefore referred to as being cholinceptive. Cells that produce acetylcholine (black rectangle in A) are located in the laterodorsal and pedunculopontine tegmental (LDT/PPT) nuclei.<sup>87</sup> The region of the black box is enlarged (B) to show cells staining positively for NADPH-diaphorase (black cells). In the LDT/PPT, 100% of the cholinergic neurons stain positively for NADPH-diaphorase.<sup>90</sup> Cholinergic LDT/PPT neurons (C) project to the mPRF and can be labeled by mPRF injection of fluorescent tracers (D) and other retrograde tracing molecules.<sup>88,89</sup> Acetylcholine release from LDT/PPT neurons contributes to the brain activation characteristic of rapid eye movement sleep and wakefulness.

the state-dependent changes in neuronal excitability documented by preclinical studies fit well with brain region-specific alterations in brain metabolism and blood flow elucidated by advances in the functional neuroimaging of sleep.<sup>39,79</sup>

This review focuses on the role of the pons in the regulation of arousal states. The primacy of the pontine reticular formation (fig. 2) as a region contributing to arousal state control originated with Jouvet's<sup>80</sup> discovery that the surgically isolated pontomedullary brain stem was sufficient for generating REM sleep. The conclusion that the pons plays a key role in REM sleep generation is further supported by basic<sup>81</sup> and clinical<sup>75,82-86</sup> evidence showing that pontine lesions disrupt REM sleep.

Pontine cholinergic neurons (fig. 2) are located in the laterodorsal and pedunculopontine tegmental (LDT/PPT) nuclei.<sup>87</sup> Neurons in the medial pontine reticular formation (mPRF) do not synthesize acetylcholine and receive their cholinergic input from LDT/PPT nuclei.<sup>55,75,88-90</sup> Cholinergic neurons are present in re-

gions of human pons that are homologous to LDT/PPT in nonhuman animals.<sup>91</sup>

Laterodorsal and pedunculopontine tegmental neurons contribute significantly to control of ascending arousal-promoting input and descending motor output.<sup>92</sup> LDT/PPT neurons regulate acetylcholine release within the mPRF,<sup>93</sup> and REM sleep is enhanced by LDT/PPT electrical stimulation.<sup>94</sup> Microdialysis data show that acetylcholine release in the pontine dorsal tegmental field<sup>95</sup> and in the medial pontine reticular formation<sup>96,97</sup> is significantly greater during spontaneous REM sleep than during wakefulness or non-REM sleep. Microdialysis data also demonstrate significant enhancement of acetylcholine release in the mPRF during the cholinergically induced REM sleep-like state compared with waking levels.<sup>98</sup> Taken together, these data demonstrate that pontine cholinergic neurotransmission participates in generating the activated brain state of REM sleep.

Receptor mapping studies have demonstrated muscarinic cholinergic receptors localized to the mPRF of

cats<sup>99</sup> and homologous oral pontine reticular nucleus of rats.<sup>100</sup> Many studies have attempted to specify the role of the five muscarinic receptor subtypes in the regulation of sleep and wakefulness. A challenge for such studies is the existence of only relatively subtype selective muscarinic antagonists and the lack of subtype selective muscarinic receptor agonists.<sup>101,102</sup> There is good evidence from animal studies that in the pontine reticular formation, muscarinic receptors of the M2 subtype are important for REM sleep generation.<sup>103</sup> Functional data indicate that M2 muscarinic autoreceptors modulate acetylcholine release in the mPRF of cats<sup>104</sup> and oral pontine reticular nucleus of C57BL/6J mice.<sup>105</sup> Cholinergically activated signal transduction cascades in the pontine reticular formation contribute to REM sleep generation. All muscarinic receptors are coupled to guanine nucleotide binding (G) proteins, and in many brain regions M2 and M4 muscarinic receptor subtypes are linked to inhibitory G proteins (Gi). Therefore, activation of M2 or M4 muscarinic receptors inhibits adenylyl cyclase, cyclic adenosine monophosphate, and protein kinase A.<sup>101</sup> Pertussis toxin catalyzes the adenosine diphosphate ribosylation of the  $\alpha$ -subunit of Gi proteins<sup>106</sup> and thereby inhibits intracellular signaling mechanisms normally caused by activating Gi proteins. Cholinergic REM sleep enhancement is blocked by administration of pertussis toxin into the pontine reticular formation of cats<sup>107</sup> and C57BL/6J mice.<sup>108</sup> These data are consistent with G-protein mediation of REM sleep. This interpretation is supported by additional signal transduction studies demonstrating cholinergic REM sleep modulation by mPRF adenylyl cyclase, 3',5'-cyclic adenosine monophosphate, and protein kinase A.<sup>109,110</sup> Direct measurement of G proteins reveals activation by carbachol and inactivation by atropine in the pontine reticular formation of rats<sup>111</sup> and C57BL/6J mice,<sup>65</sup> further supporting a role for pontine M2 and possibly M4 muscarinic receptors in REM sleep generation. The muscarinic receptor subtypes mediating REM sleep in humans remain to be identified.

### The Cholinergic Model of Arousal State Control: A Tool for Causal Hypothesis Testing

All efforts to understand the neurobiology of arousal state control must be able to differentiate cellular and molecular events that cause changes in arousal states from events that are merely correlated with a particular state. Forty years of sleep research concur that administering acetylcholine or cholinergic agonists into the pontine reticular formation of intact, unanesthetized animals causes a REM sleep-like state.<sup>103,112-116</sup> The ability to cause physiologic and behavioral traits resembling REM sleep has provided an important experimental tool for

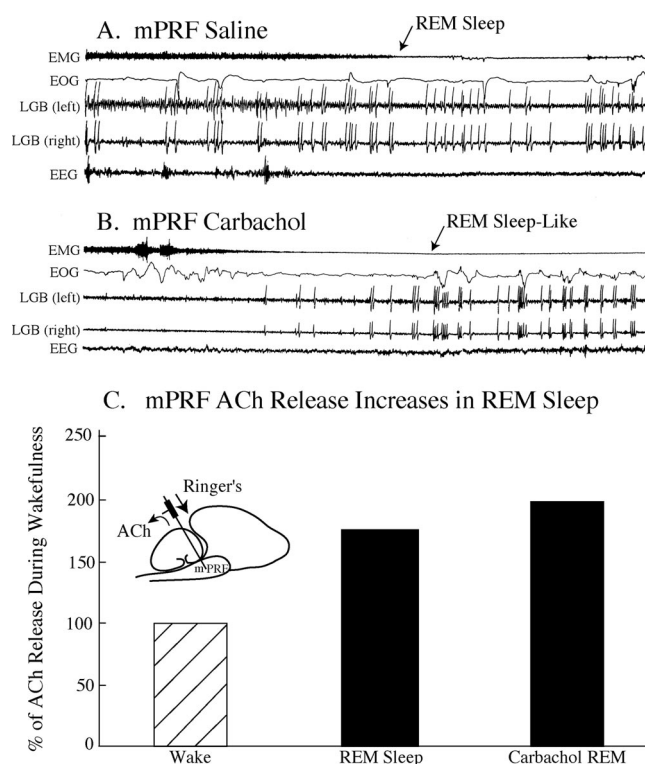

**Fig. 3.** The electrographic features of rapid eye movement (REM) sleep are elicited by microinjection of cholinergic agonists (e.g., carbachol) or acetylcholinesterase inhibitors into medial regions of the pontine reticular formation (mPRF). The traces in *A* illustrate 80 s of recording from an intact, unanesthetized cat during the transition from non-REM sleep to REM sleep (arrow) after saline (control) microinjection into the medial pontine reticular formation. Note the onset of muscle atonia in the electromyogram (EMG). The cortical electroencephalogram (EEG) shows the normal transition from the high-amplitude waves of non-REM sleep to the low-amplitude, fast-frequency waves of REM sleep. Recordings from depth electrodes placed in the left and right lateral geniculate bodies (LGB) reveal the onset of field potentials that comprise a state-specific marker of REM sleep. These potentials are named *PGO waves* for the brain locations (pons, geniculate, occipital cortex) from which they can be recorded.<sup>481</sup> Microinjecting nanogram amounts of carbachol (*B*) into the mPRF causes a REM sleep-like state characterized by the same electrographic features of REM sleep (*A*). One difference is that microinjection of cholinomimetics into the mPRF causes onset of a REM sleep-like state to occur directly from wakefulness, with no intervening non-REM sleep (*B*). EOG = electrooculogram. From Baghdoyan *et al.*,<sup>116</sup> modified with permission. *C* indicates that, compared with wakefulness, acetylcholine (ACh) release in the mPRF (see inset) significantly increases during both REM sleep and during the cholinergically evoked REM sleep-like state (Carbachol REM). From Leonard and Lydic<sup>97</sup> and Lydic *et al.*,<sup>98</sup> modified with permission. These findings demonstrate a role for pontine cholinergic transmission in the generation of REM sleep.

overcoming the limitations of merely correlating physiologic traits with different arousal states. The cholinergic model of REM sleep shares many of the physiologic and behavioral features of spontaneous REM sleep, such as tonic motor atonia, phasic muscle twitches, rapid eye movements, and activation of the cortical electroencephalogram (fig. 3). Neuropharmacologic evocation of the REM sleep-like state is concentration dependent,



significantly dependent on the site of pontine microinjection, and blocked by muscarinic antagonists such as atropine,<sup>72,103,117</sup> indicating mediation by muscarinic cholinergic receptors. The cholinergically evoked REM sleep-like state also is blocked by drugs that disrupt the vesicular packaging of acetylcholine.<sup>118</sup>

Five major factors have contributed to advances in understanding arousal state control resulting from the cholinergic model of REM sleep. First, pontine administration of cholinomimetics causes the short latency onset of multiple physiologic and behavioral traits that are not significantly different from those observed during REM sleep without drug administration (fig. 3). Therefore, the model is ideally suited to testing causal rather than merely correlational hypotheses. Second, efforts to understand how arousal states are generated must identify specific brain regions (fig. 2) and receptor systems (muscarinic cholinergic) regulating arousal states. Third, parallel experiments can be conducted using intact, spontaneously sleeping animals. This makes it possible to determine how the cholinergically induced REM sleep-like state is similar to and different from naturally occurring REM sleep. For example, figure 3C shows that acetylcholine release in the medial pontine reticular formation increases during both REM sleep and the cholinergically induced REM sleep-like state. Fourth, these experiments permit quantitative comparisons of multiple physiologic traits (e.g., electroencephalogram, electromyogram, breathing) during cholinergically induced and spontaneously occurring states. When inferential statistics reveal lack of a significant difference between a dependent variable quantified during REM sleep and during the cholinergic model, one may assign a quantitative probability to having identified a common control mechanism. Fifth, from the perspective of comparative biology, there is compelling evidence that cholinergic neurotransmission modulates arousal.<sup>119</sup> Many laboratories have shown that administering a cholinergic agonist to homologous pontine regions of rats also causes a REM sleep-like state.<sup>120–127</sup> Neural networks generating physiologic traits of REM sleep can be cholinergically activated even in anesthetized rats<sup>128</sup> and cats.<sup>129</sup> Pontine reticular formation microinjection of neostigmine also has been shown to cause a REM sleep-like state accompanied by REM sleep-like alterations in breathing in B6 mice.<sup>108,130</sup> In humans, intramuscular administration of the cholinergic antagonist scopolamine significantly delays REM sleep onset.<sup>131</sup> Intravenous injection of cholinergic agonists or acetylcholinesterase inhibitors shortens latency to onset and increases duration of human REM sleep.<sup>132,133</sup> Intravenous administration of the acetylcholinesterase inhibitor physostigmine increases REM sleep in cats.<sup>119</sup> Systemic administration of physostigmine enhances breathing in some obstructive sleep apnea patients<sup>134</sup> and reverses propofol-induced unconsciousness.<sup>135</sup> Finally, there is good agreement

from human studies that the pontine reticular formation plays an essential role in regulating arousal<sup>37,38,136,137</sup> and attention.<sup>138</sup> The excellent agreement between human and nonhuman data demonstrates that basic studies of brain acetylcholine are relevant to problems of clinical interest.<sup>27,28,30</sup>

The data reviewed above show that the ability to test causal hypotheses regarding the neurochemical regulation of arousal states and physiologic traits has been significantly advanced by the cholinergic model of REM sleep. The cholinergic model has helped elucidate pontine cholinergic neurotransmission as a causal factor contributing to arousal state control. The following section reviews state-dependent modulation of muscle tone, awareness and memory, nociception, and respiratory control and highlights the role of pontine acetylcholine in producing these traits.

### Multiple Traits Define Arousal States

The success of sleep neurobiology has been derived, in part, from deconstructing states into their component traits and then characterizing the mechanisms regulating those traits. Those data, and the lack of support for a unitary hypothesis of anesthesia,<sup>51,52</sup> make clear that characterizing the mechanisms generating anesthetic traits provides a powerful paradigm for gaining insight into the regulation of anesthetic states. The desirable anesthetic state is a constellation of reversible traits that include analgesia, amnesia, unconsciousness, blunted sensory and autonomic reflexes, and skeletal muscle relaxation.<sup>139</sup> In addition to the characteristic of reversibility, another goal of anesthesia is the temporal coordination of the foregoing five traits. Ideally, the onset of these drug-induced traits occurs at approximately the same time. Undesirable anesthetic complications often are characterized by temporal dissociations in the offset of drug-induced traits, such as failure of a seemingly awake, postanesthetic patient to maintain upper airway patency. As with successful anesthesia, normal sleep also requires the temporal coordination of multiple traits. In fact, the nosology of many sleep disorders is characterized by the intrusion of sleep traits into the state of wakefulness (e.g., onset of motor atonia during a narcoleptic attack) or the expression of waking traits during sleep (e.g., somnambulism).

In the following subsections, attention is focused on the REM phase of sleep because REM sleep is accompanied by significant perturbations in the regulation of cardiovascular function,<sup>20,78,140–147</sup> motor control,<sup>148,149</sup> neuroendocrine function,<sup>150</sup> host response to infection,<sup>151–154</sup> cognitive processing,<sup>40</sup> and nociception.<sup>155–157</sup>

#### *Traits Defining States: Muscle Tone*

The reversible, active inhibition of motor tone is essential for the integrity of both anesthesia and sleep. The

Fig. 4. Motoneuron hyperpolarization during the rapid eye movement (REM; active) phase of sleep. Recordings of electroencephalogram (EEG), ponto-geniculo-occipital (PGO) waves from the thalamus, electrooculogram (EOG), and neck muscle electromyogram (EMG) show transitions between non-REM (quiet) sleep, REM (active) sleep, and wakefulness during 31 min (*abscissa*). Intracellular recording (membrane potential) of a jaw-closure (masseter) motoneuron shows the beginning of hyperpolarization (toward  $-80$  mV) at approximately 3.5 min, during the transition from non-REM sleep to REM sleep. During the active sleep phase (REM sleep), there was an increase in eye movement potentials (electrooculogram) and a decrease in neck muscle electromyographic activity. Note at 12.5 min the membrane depolarization (toward  $-60$  mV) with the spontaneous arousal. At approximately 25.5 min, there was a resumption of REM (active) sleep and again a hyperpolarization of the motoneuron. This recording illustrates the temporal coordination between onset and offset of skeletal motor inhibition and the other electrographic traits of REM sleep, including electroencephalographic activation, PGO waves, and rapid eye movements. Disruptions in the temporal coordination of these traits contribute to pathophysiologic states. From Chase and Morales;<sup>149</sup> used with permission.

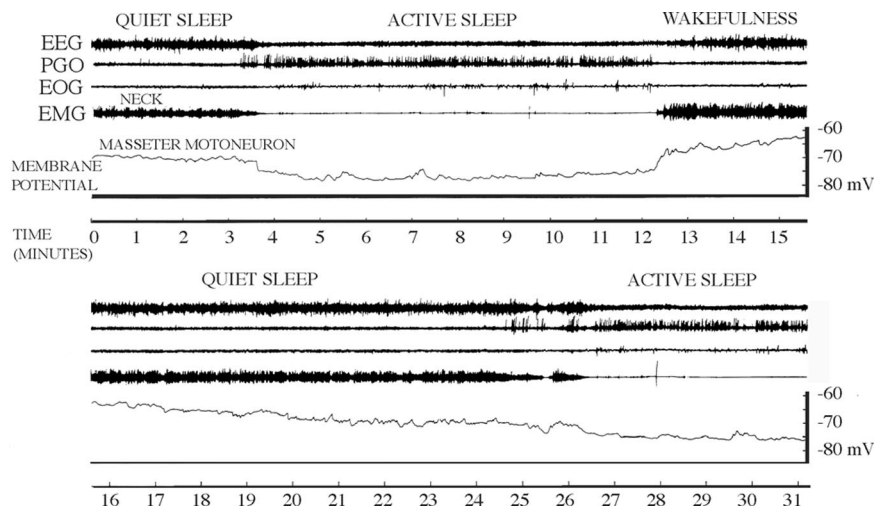

development of muscle-relaxing drugs is recognized as one of the major advances in anesthesiology.<sup>158,159</sup> Disrupting the neuromuscular transmission characteristic of wakefulness is essential for maintaining states of anesthesia. Without peripheral neuromuscular blockade, anesthetized or sedated patients can exhibit purposive movements in response to nociceptive stimulation. Maintenance of normal sleep also requires muscle tone suppression. Within a sleep interval, the loss of wakefulness is followed by NREM sleep. During the NREM phase of sleep, there is onset of hypotonia in antigravity muscles. The REM phase of sleep normally develops out of NREM sleep, and postural muscles are actively inhibited during REM sleep. The electromyographic recordings shown in figures 3 and 4 illustrate the gradual development of motor atonia seen during the onset of normal REM sleep. With the resumption of wakefulness from sleep, motor tone returns (fig. 4).

Volatile anesthetics have been reported to inhibit nicotinic receptors and decrease patient requirement for muscle relaxants (reviewed in Dilger).<sup>160</sup> The exact spinal mechanisms by which anesthetics cause immobility are not clear and vary with different inhalation agents.<sup>161</sup> Preclinical studies report that administration of muscarinic and nicotinic antagonists does not alter immobility produced by isoflurane.<sup>162</sup> In addition to peripheral mechanisms of motor inhibition, anesthetic drugs are likely to alter muscle tone *via* CNS actions. The remainder of this section selectively highlights advances regarding CNS mechanisms that actively generate the motor hypotonia and atonia of natural sleep. The CNS mechanisms causing motor atonia during sleep are relevant to anesthesiology for at least three reasons. First, potent agents, intravenous anesthetics, and opioids all have actions on the medullary and pontine neurons regulating

state-dependent changes in muscle tone. Second, some of the negative motor effects after prolonged administration of neuromuscular blocking agents in the intensive care environment are likely to be CNS mediated. Finally, pontomedullary systems that actively inhibit motor tone may comprise a target for future anesthetic drug development.

The current appreciation that REM sleep is present in all placental, terrestrial mammals<sup>163</sup> grew from the discovery that, similar to humans, cats have regularly occurring episodes of REM sleep<sup>164</sup> accompanied by skeletal muscle atonia.<sup>165</sup> There is excellent homology between human and nonhuman animals for the trait of state-dependent atonia. This homology has made it possible for preclinical studies to significantly advance efforts to understand human disorders of motor control. This homology provides another good example of basic research advancing the understanding and treatment of human pathophysiology. Inability to generate the normal REM sleep atonia can permit the expression of complex motor acts during sleep.<sup>166</sup>

Specific brain stem regions are now known to regulate state-dependent motor control (reviewed in Lai and Siegel<sup>148</sup> and Chase and Morales).<sup>149</sup> Early studies showed that the medullary reticular formation contains a neuronal network that inhibits skeletal muscle tone.<sup>167</sup> Pioneering recordings of single cell discharge revealed a REM sleep-dependent suppression of both flexor and extensor muscle activity.<sup>168</sup> Extracellular recordings from brain stem neurons provided evidence for control of muscle tone by monoamine-containing nuclei such as the locus coeruleus and midline dorsal raphe nucleus.<sup>148,169,170</sup> The significant influence of sleep on mono-synaptic reflex control came from studies which used the jaw-closure reflex as a model system.<sup>171</sup> These studies made the important discovery that evocation of the

jaw-closure reflex was facilitated during wakefulness and absent during REM sleep.

Studies of state-dependent changes in cellular excitability require the technically daunting feat of intracellular recordings from brain stem neurons across states of sleep and wakefulness. The first reports of intracellular recordings from motoneurons during sleep were made in 1978 (reviewed in Chase and Morales).<sup>149</sup> Intracellular recordings of membrane potential were obtained from the motor nucleus of the fifth cranial nerve (trigeminal) of intact, unanesthetized cats across spontaneous cycles of sleep and wakefulness. While these recordings were maintained, the mesencephalic nucleus was stimulated electrically to evoke the jaw-closure reflex. Electrical stimulation of the pontine reticular formation with another electrode facilitated the jaw-closure reflex during wakefulness and NREM sleep, but the reflex was abolished during REM sleep.<sup>172</sup> This ability of REM sleep to reverse the monosynaptic reflex is referred to as *reflex response reversal*. The key point is that the sign (excitation or inhibition) of the reflex was reversed as a function of sleep. One implication of these important discoveries is the potential for synaptically mediated events to underlie the disruptions in autonomic control, such as upper airway hypotonia, that are characteristic of REM sleep.

Figure 4 illustrates motoneuron hyperpolarization during REM sleep. The discovery of reflex response reversal encouraged efforts to understand the cellular and molecular mechanisms mediating REM sleep-dependent atonia. These studies required the development of techniques for maintaining long-term intracellular recordings from spinal cord neurons. The first intracellular recording from spinal motoneurons across states of sleep and wakefulness<sup>173</sup> began to provide insights into the cellular mechanisms causing the atonia of REM sleep. Studies of spinal motoneurons during sleep are directly relevant to research characterizing anesthetic actions on spinal neurons.<sup>174</sup> During REM sleep, motoneurons are bombarded with inhibitory postsynaptic potentials (IPSPs).<sup>149</sup> These IPSPs are suprasegmental in origin and comprise one mechanism contributing to the atonia of REM sleep. Pontine administration of cholinergic agonists causes a REM sleep-like state which includes the trait of skeletal muscle atonia.<sup>103,175</sup> Relative to the cholinergic model of REM sleep (fig. 3), it should be clear that the intracellular recordings from lumbar motoneurons revealed that pontine administration of cholinergic agonists caused IPSPs that were indistinguishable from IPSPs recorded during natural REM sleep.<sup>176</sup> These  $\alpha$  motoneuron IPSPs are glycinergically mediated.<sup>149</sup> The implication of such an observation is that pontine cholinergic neurotransmission comprises one link in the causal chain of events causing the motor atonia of REM sleep. Microinjection of carbachol into pontine reticular regions known to enhance REM sleep causes increased medullary and spinal

levels of glycine and GABA.<sup>177</sup> Altering pontine cholinergic neurotransmission also can cause upper airway hypotonia, described below in the section about state-dependent alterations in respiratory control.

In addition to the trait of tonic motor atonia, REM sleep is characterized by phasic myoclonic contractions. These limb jerks or twitches of REM sleep occur most often in conjunction with intense rapid eye movement activity and ponto-geniculo-occipital waves (fig. 3A). At the spinal motoneuron level, these intervals of intense rapid eye movements reveal membrane depolarization and cell discharge. These phasic increases in motoneuron excitability seem to be mediated by the amino acid transmitter glutamate and by non-*N*-methyl-D-aspartate receptors.<sup>149</sup>

At the level of the pons, multiple neurotransmitters and neuromodulators can induce muscle atonia. The relation between acetylcholine and state-dependent atonia is demonstrated by microdialysis data that document increased acetylcholine release in dorsal<sup>95</sup> and medial<sup>97</sup> regions of the pontine reticular formation during REM sleep (fig. 3A), during the REM sleep-like state caused by administration of carbachol into the mPRF (fig. 3B),<sup>98</sup> and during episodes of cataplexy in the canine model of narcolepsy.<sup>178</sup> As discussed above, the mPRF receives cholinergic projections from the LDT/PPT nuclei (reviewed in Steriade and McCarley).<sup>90</sup> Electrical stimulation of LDT/PPT increases acetylcholine release in the mPRF while causing hypotonia and respiratory rate depression.<sup>93</sup> Corticotropin-releasing factor, glutamate, kainic acid, and quisqualic acid have been shown to induce muscle atonia when microinjected into the mPRF of cats or homologous regions of rats referred to as pontine reticular nucleus, oral part.<sup>148</sup> The PPT also receives  $\gamma$ -aminobutyric acid-mediated (GABAergic) projections from the basal ganglia, which contribute to the regulation of skeletal muscle tone.<sup>179</sup> Cholinergic REM sleep enhancement also activates cells in the dorsolateral pontine cuneiform nucleus. This nucleus expresses nitric oxide synthase and, when stimulated, suppresses motor tone and somatic reflexes.<sup>180</sup> The intertrigeminal region is located more ventrally in the pons, and lesions of the intertrigeminal area depress respiratory motor activity.<sup>181</sup>

There is good agreement that the principle mechanism for REM sleep atonia is postsynaptic inhibition.<sup>149</sup> Future studies are needed to differentiate the extent to which active inhibition and disfacilitation (*i.e.*, the loss of excitatory input) contribute to motor atonia caused by general<sup>160</sup> and local<sup>182</sup> anesthetics. Such studies also will be important for specifying the mechanisms by which anesthetics acting at the spinal cord can alter brain arousal.<sup>183,184</sup>

#### *Traits Defining States: Unconsciousness and Amnesia*

The absence of a satisfactory definition of consciousness in relation to sleep<sup>185</sup> and anesthesia<sup>186,187</sup> is well



appreciated. The challenge of operationally differentiating consciousness, arousal, vigilance, and alertness has been thoughtfully reviewed.<sup>188</sup> Cognitive activity occurs during sleep in the form of dreams,<sup>40</sup> and the mental activity of dreaming is characteristically bizarre.<sup>189</sup> The discovery of the REM phase of sleep noted reports of vivid mental activity.<sup>33</sup> Relevant for efforts to identify similarities and differences between states of sleep and anesthesia, dreaming during anesthesia was reported in only 6% of the patients included in a large, multicenter study.<sup>190</sup> Dreaming occurs during REM sleep, and deprivation of REM sleep causes a rebound increase in dreaming,<sup>191</sup> consistent with the view that REM sleep is a homeostatically regulated, fundamental need. Given favorable circumstances, dream recall can be elicited from virtually all intact, healthy humans.<sup>192</sup> Even allowing for variance in research methodology, these comparisons suggest significant difference in mental activity during sleep and anesthesia. Differences in cholinergic neurotransmission during sleep and anesthesia account, in part, for differences in mental activity.<sup>30</sup>

In the operating room and the intensive care unit,<sup>193</sup> amnesic drugs are desirable for preventing recall, and benzodiazepines routinely are used to produce anterograde amnesia. The significant sleep disturbances of intensive care unit patients has been reviewed elsewhere,<sup>194</sup> and the potential clinical benefit of continuous intensive care unit sedation is not supported by available data.<sup>195,196</sup> Imperfect pharmacology and patient diversity force anesthesiologists to a margin between undertreatment—with the risk of patient recall—and potential complications secondary to excessively deep or prolonged unconsciousness. Analyses of closed claims data in the United States indicate a 300% increase since the 1970s in cases of patients' recall of events while undergoing general anesthesia.<sup>197</sup> Data from a multicenter study suggest that awareness during anesthesia may occur with an incidence of 1–2 per 1,000 patients, resulting in 26,000 cases each year in the United States.<sup>190</sup>

In elderly patients, pharmacologic manipulation of GABA or cholinergic neurotransmission can contribute to the undesirable side effect of postoperative delirium. Recent compendia indicate an incidence of postoperative delirium in 2–50% of nondemented, older patients.<sup>198</sup> Although it is cautioned that most of the research on postoperative delirium in the elderly is “purely descriptive or anecdotal,” postoperative delirium is associated with delayed recovery, increased time in the hospital, and increased morbidity.<sup>198</sup> The central anticholinergic syndrome can contribute to delirium and prolonged anesthetic recovery,<sup>199</sup> and cholinergic agents can activate the cortical electroencephalogram by reversing the actions of isoflurane.<sup>67</sup>

The foregoing points illustrate the need for systematic research on sedation, postoperative delirium, and brain

mechanisms regulating states of sleep and anesthesia. It is relevant to note that current clinical guidelines for sedating children are based on the degree and definition of sedation, rather than on the pharmacologic agent administered.<sup>200</sup> Preclinical studies investigating the relation between sleep and prolonged propofol sedation suggest that sedation caused no evidence of sleep deprivation.<sup>60</sup> Prolonged sedation, however, potentiated the onset and duration of loss of righting reflex induced by propofol and isoflurane.<sup>61</sup> Objective measures of drive to sleep in human volunteers show that sleep tendency is increased for up to 8 h after drugs used for ambulatory surgery.<sup>26</sup> The importance and clinical relevance of studies such as this<sup>26</sup> is emphasized by the fact that more than 60% of all surgeries in the United States are performed in an ambulatory environment.<sup>201</sup>

The term *conscious sedation* describes a pharmacologically induced arousal state that is similar to but different from physiologic sleep. The term *sleep* provides a convenient metaphor<sup>54</sup> for an assortment of altered arousal states caused by sedative-hypnotic drugs. Authors focusing on the sleep-like traits of sedation describe this altered arousal state as “light sleep.”<sup>202</sup> More recent anesthesia textbooks note that “the terms sleep, hypnosis, and unconsciousness are used interchangeably in anesthesia literature to refer to the state of artificially induced (i.e., drug-induced) sleep.”<sup>203</sup> There are also important differences between sleep and sedation. A key criterion for successful sedation is depression of sensory input. Although sleep is characterized by diminished sensory processing, nociceptive input disrupts sleep. Intervals of sleep do not terminate with vomiting, but there is a positive correlation between level of sedation and amount of nausea and vomiting.<sup>204</sup> Motor atonia, as outlined above, is a characteristic of REM sleep. In contrast, conscious sedation is a dissociated state comprised of waking traits, such as the ability to follow verbal commands, and traits similar to sleep, such as memory impairment and autonomic depression.

Objective criteria for accurately distinguishing between sedation and natural sleep are relevant to practice guidelines for monitoring levels of consciousness during sedation.<sup>205–207</sup> The distinct differences between the NREM and REM phases of sleep reviewed above illustrate the potential for inaccurate arousal state classification when obtunded states of arousal are all described as “sleep.” Pharmacologically induced states of sedation are superimposed on a patient's endogenous level of arousal, and endogenously generated arousal states “can oscillate rapidly, resulting in bizarre and important clinical syndromes.”<sup>208</sup> For example, children given ketamine-midazolam have been described as “asleep but arousable,”<sup>209</sup> but this arousal state can change to one of confusional hyperarousal. After oral, intravenous, or rectal administration of midazolam, paradoxical excitement has been reported in up to 10% of children in recovery



or after discharge.<sup>210</sup> The mechanisms causing paradoxical excitement are unknown. Determining the causes of this altered arousal state represent an important research opportunity.

#### *Traits Defining States: Nociception*

There is a reciprocal relation between sleep and pain.<sup>211,212</sup> Preclinical studies from the laboratory of Pompeiano<sup>168</sup> demonstrated for the first time that ascending spinal pathways were suppressed during REM sleep. Single cell recordings from dorsal spinocerebellar tract and spinoreticular tract neurons show that spontaneous and evoked neuronal responses are depressed during REM sleep, relative to wakefulness and NREM sleep.<sup>155</sup> This cellular depression results from both pre-synaptic and postsynaptic inhibitory processes. Additional data show that REM sleep-dependent sensory neuron suppression also may vary as a function of sensory modality and afferent fiber diameter. In humans, REM sleep depresses the Babinski and plantar flexion reflexes<sup>213</sup> and reduces the excitability of spinal polysynaptic nociceptive reflexes.<sup>214</sup> Studies using human volunteers indicate that the ability to process nociceptive input is present during all stages of sleep.<sup>215</sup> The reduction of human thermal pain sensation during sleep<sup>216</sup> may be mediated by sleep-dependent inhibition of spinoreticular tract neurons, which convey pain and tactile input to rostral brain regions.<sup>156</sup> Little attention, however, has been given to the question of how spinal nociceptive mechanisms interact with supraspinal systems known to generate states of sleep and wakefulness. The remainder of this section highlights evidence that pontine cholinergic networks long known to regulate states of consciousness<sup>42</sup> also modulate nociceptive processing. The data reviewed below imply that a better understanding of supraspinal cholinergic antinociception may lead to the development of adjunctive therapies than can diminish pain without the unwanted side effect of sleep disruption.<sup>217,218</sup>

Many clinical and preclinical studies have demonstrated the enhancement of pain threshold *via* epidural, spinal, or intrathecal administration of cholinergic agonists and acetylcholinesterase inhibitors.<sup>219–224</sup> Preclinical studies administering opioids directly into the brain stem have produced systematic maps for understanding the supraspinal sites and mechanisms of opioid analgesia (*cf.* table 3 in<sup>225</sup>). These pioneering mapping studies did not investigate medial pontine reticular formation regions known to regulate sleep and wakefulness. Data demonstrating cholinergic generation of REM sleep and antinociception led to examination of the hypothesis that the medial pontine reticular formation contributes to supraspinal antinociception.<sup>59</sup>

Figure 5 shows the time course of antinociceptive behavior cholinergically evoked from the medial pontine reticular formation. The key finding was that microinjec-

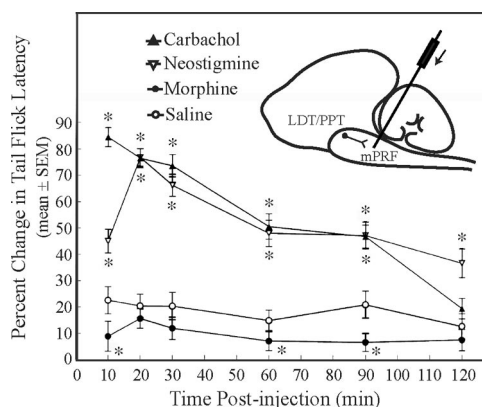

**Fig. 5.** Time course of antinociceptive behavior after medial pontine reticular formation (mPRF) microinjection of carbachol, neostigmine, morphine, or saline (control). Tail flick latency is expressed on the ordinate as mean  $\pm$  SEM percent change from baseline. Time after drug delivery into the mPRF is shown on the abscissa. Note the significant enhancement of tail flick latency after mPRF microinjection of carbachol, neostigmine, or both. Morphine, similar to saline, had no antinociceptive actions after administration into the mPRF. \* Significant increases in cholinergically elicited antinociceptive behavior compared with saline, or significant decreases induced by morphine. These findings imply that cholinergic stimulation of the mPRF may contribute to rapid eye movement sleep-dependent suppression of sensory input. LDT/PPT = laterodorsal and pedunculopontine tegmental. From Kshatri *et al.*,<sup>59</sup> used with permission.

tion of the cholinergic agonist carbachol and the acetylcholinesterase inhibitor neostigmine caused a significant and prolonged enhancement of antinociceptive behavior. This behavior is measured as the latency with which an animal flicks its tail to avoid a thermal stimulus. In contrast, morphine administered directly into the same medial pontine reticular formation site did not increase tail flick latency. These data showed that regions of the pontine reticular formation known to generate REM sleep can also modulate antinociceptive behavior.<sup>59</sup>

Figure 6 illustrates the finding that cholinergic drugs enhance REM sleep<sup>103</sup> whereas opioids inhibit REM sleep<sup>226,227</sup> when microinjected into the medial pontine reticular formation. Sleep cycle disruption by opioids is recognized in the substance abuse literature, and clinical data implicate opioids as a potential contributor to postoperative sleep disruption.<sup>218,228</sup> Postoperative sleep disruption has been shown to be followed by a rebound increase in REM sleep.<sup>229,230</sup> After lower abdominal surgery, patients who receive morphine also have poor sleep quality.<sup>27</sup> Multiple brain mechanisms contribute to sleep disruption caused by opioids. For example, the basal forebrain provides cholinergic projections to the cortex that are essential for maintaining normal activation of the electroencephalogram and behavioral arousal. Morphine acts at the level of the basal forebrain to decrease acetylcholine release in the prefrontal cortex, disrupt activation of the electroencephalogram, and blunt arousal.<sup>231</sup> REM sleep is also an activated brain state. Acetylcholine is essential for REM sleep genera-

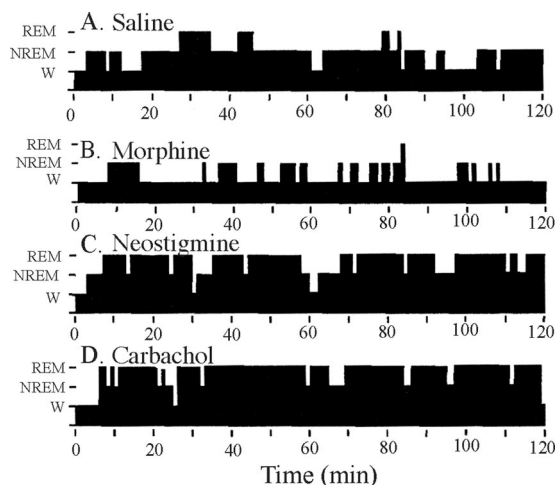

Fig. 6. Time spent in wakefulness (W), non-rapid eye movement (NREM) sleep, and rapid eye movement (REM) sleep after injection of saline (A), morphine (B), neostigmine (C), or carbachol (D) into the medial pontine reticular formation. These plots represent the minute-by-minute scoring of polygraphically confirmed states of arousal. Note the enhancement of REM sleep caused by neostigmine or carbachol, and the inhibition of REM sleep caused by morphine. These data are consistent with the interpretation that the decrease in REM sleep caused by systemically administered opioids is mediated, at least in part, at the level of the mPRF. From Kshatri *et al.*;<sup>59</sup> used with permission.

tion, and opioids decrease acetylcholine release in pontine regions generating REM sleep.<sup>232,233</sup> In these same pontine brain regions, opioids inhibit REM sleep *via*  $\mu$ -opioid receptor mechanisms.<sup>226</sup> The cellular and molecular mechanisms causing postoperative REM sleep rebound remain poorly understood. Preclinical data recently indicate that after 24 h of sleep deprivation, rats anesthetized for 6 h with propofol recovered sleep to the same degree as rats allowed to sleep for 6 h.<sup>69</sup>

Results of tail flick latency experiments conducted across polygraphically recorded states of wakefulness, NREM sleep, and REM sleep made clear that in every sleep/wake state, neostigmine and carbachol produced significantly greater antinociceptive behavior than saline (vehicle control) or morphine when microinjected into the medial pontine reticular formation (fig. 7). This finding of cholinergic antinociception evoked from the medial pontine reticular formation<sup>59</sup> is not limited to cats. Delivery of cholinergic agonists into homologous regions of rat pontine reticular formation also enhances antinociception,<sup>234,235</sup> and chronic opioid administration inhibits sleep.<sup>236</sup>

The medial pontine reticular formation is not considered to be a component of pain pathways. The data reviewed here, however, demonstrate that pontine regions known to regulate sleep also contribute to supraspinal cholinergic antinociception. At the level of the intralaminar thalamus, preclinical studies also demonstrate antinociceptive mechanisms *via* muscarinic mechanisms.<sup>237</sup> Modulation of nociception may be another function subserved by peptides that alter levels of

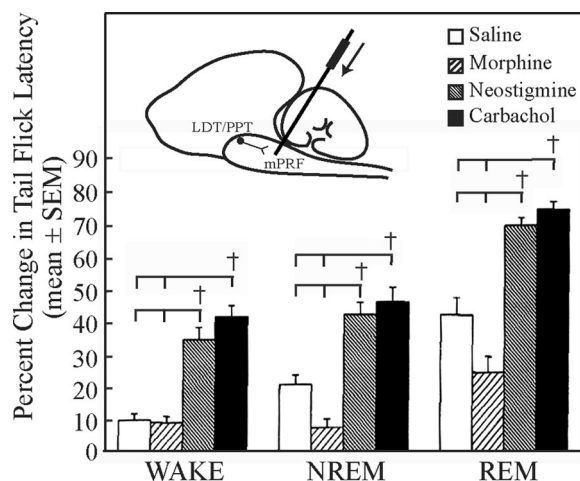

Fig. 7. Nociception is altered by sleep and wakefulness. In every arousal state, medial pontine reticular formation (mPRF) microinjection of neostigmine and carbachol caused greater antinociceptive behavior than mPRF administration of saline or morphine. The state-dependent increase in tail flick latency is evident from a rank ordering of latencies showing that for each of the microinjection treatments, tail flick latency in wakefulness < non-rapid eye movement (NREM) sleep < rapid eye movement (REM) sleep. Therefore, cholinergic stimulation of the mPRF may contribute to the REM sleep-dependent increase in antinociceptive responsiveness. LDT/PPT = laterodorsal and pedunculopontine tegmental. From Kshatri *et al.*;<sup>59</sup> used with permission.

arousal. For example, hypocretin-1 (also called orexin A) activates G proteins in the medial pontine reticular formation<sup>238,239</sup> and is antinociceptive in mice and rats.<sup>240</sup> As with the other traits characterizing anesthetic states, the trait of antinociception is modulated by multiple brain stem regions<sup>241</sup> and neurotransmitters.<sup>155,242</sup>

#### Traits Defining States: Respiration

Sleep apnea comprises one of the most prevalent and poorly understood sleep disorders.<sup>243</sup> The apneic episodes illustrated by figure 8 are more frequent and of longer duration during REM sleep.<sup>140,141</sup> Anesthesia depresses upper airway muscle function,<sup>244</sup> and this depressant action is more severe in the upper airway than on the phrenic nerve.<sup>245</sup> These data make sleep apnea directly relevant for efforts to maintain airway patency before and after intubation associated with anesthesia or sedation.<sup>246–248</sup>

The causal relation between states of consciousness and breathing is bidirectional, and changes in breathing can also alter levels of consciousness. For example, the arousal response to airway obstruction is blunted by sleep apnea,<sup>249</sup> but sleep deprivation exacerbates sleep apnea.<sup>250</sup> Asthmatic attacks can be accompanied by feelings of panic, and the conscious awareness of respiratory effort contributes to the dysphoric aspects of dyspnea.<sup>251</sup> Even small restrictions in airflow can disrupt states of sleep.<sup>252</sup> Surgical pain is arousing and therefore is a respiratory stimulant that antagonizes respiratory depression caused by opioids or potent agents.<sup>253</sup> Elim-

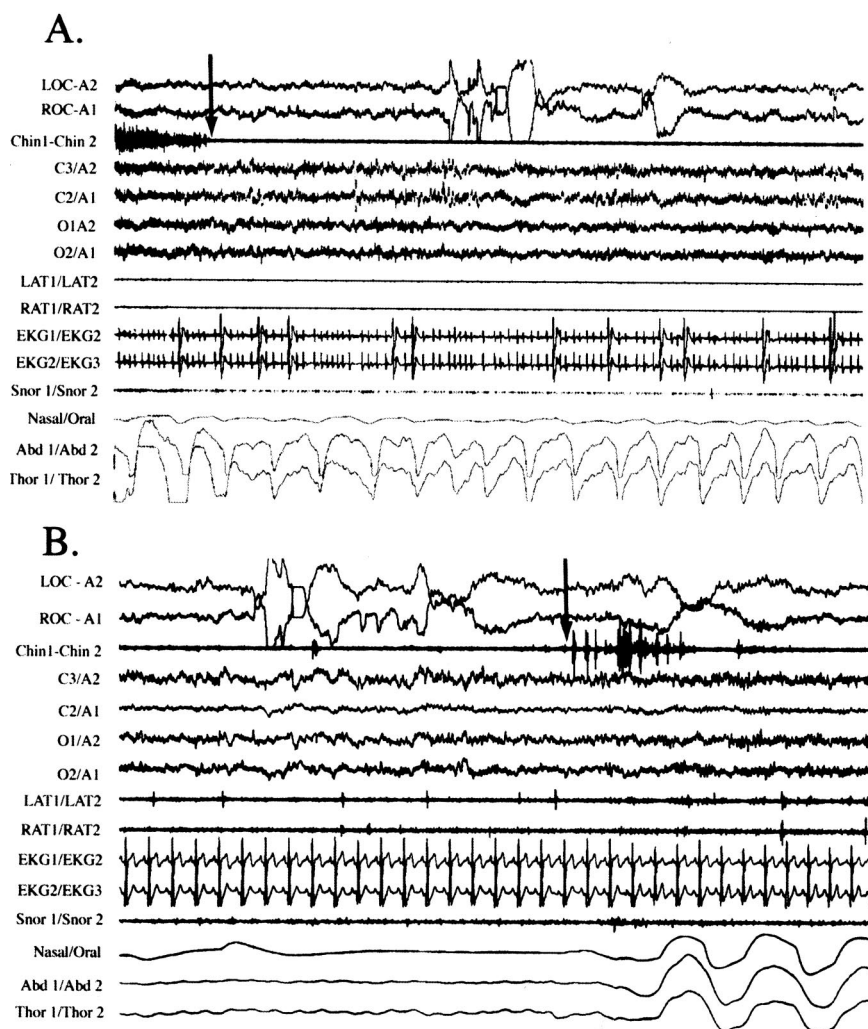

Fig. 8. Polygraphic recording of human sleep and breathing. *A* shows a transition into rapid eye movement sleep. The *arrow* marks the loss of muscle tone (Chin 1-Chin 2) with the onset of rapid eye movement sleep. This 1-min record also illustrates the decrease in respiratory airflow (Nasal/Oral trace) due to airway obstruction. Respiratory effort was maintained (Abd1/Abd2, Thor1/Thor2), indicating an obstructive (vs. central) apneic episode. Percent oxygen saturation reached a minimum of 76 and averaged only approximately 85. *B* shows a 30-s record obtained from a patient during a prolonged apnea. Note the cessation of nasal/oral airflow and the prolonged interval of hypopnea. During an arousal (*arrow*), muscle tone (Chin 1-Chin 2), respiratory effort (Abd and Thor), and airflow (Nasal/Oral) resumed. This recording illustrates the point that individuals with sleep apnea must awaken to terminate an airway obstruction and successfully breathe. Abd 1/2 = respiratory effort—abdomen; C3/A2 = left central electroencephalogram; EKG1/2 = electrocardiogram; Snor1/2 = snoring sensor; LAT1/2 = left anterior tibialis electrocardiogram; LOC-A2 = left outer canthus/right ear lobe electrooculogram placement; Nasal/Oral = airflow from nasal/oral cavity; O1/A2 = left occipital electroencephalogram; RAT1/2 = right anterior tibialis electrocardiogram; ROC-A2 = right outer canthus/right ear lobe electrooculogram placement; Thor1/2 = respiratory effort—chest.

inating the unwanted opioid side effect of respiratory depression would significantly advance clinical care.

Most patients with obstructive sleep apnea (OSA) remain undiagnosed and untreated.<sup>254–256</sup> This is of interest to anesthesiologists because OSA patients require special care for anesthetic management of the upper airway.<sup>24,31,246,257</sup> The need for special airway care is consistent with the fact that neuromuscular blocking agents<sup>258</sup> and general anesthesia<sup>245</sup> cause greater depression of upper airway muscles than of the diaphragm. The long-standing finding that OSA patients tend to be hypertensive<sup>259,260</sup> has been supported by recent prospective<sup>261</sup> and community-based<sup>262</sup> studies. The frequency and severity of OSA increases during the REM phase of sleep, but obstructive events also occur during NREM sleep.<sup>23</sup> Individuals with OSA have a peak in sudden cardiac death during sleeping hours.<sup>263</sup> There is evidence that OSA causes impaired cognitive function, likely *via* alterations in normal function of the prefrontal cortex.<sup>264</sup> The prefrontal cortex also contributes to cardiopulmonary control. Preclinical data show that rate of breathing increases with increasing levels of acetylcholine in the prefrontal cortex,<sup>265</sup> and muscarinic cholin-

ergic autoreceptors regulate acetylcholine release in mouse prefrontal cortex.<sup>266–268</sup>

Childhood OSA is a common disease estimated to occur in approximately 2% of young children<sup>269</sup> and is associated with diminished cognitive function.<sup>270</sup> Children with OSA have a high incidence of respiratory complications associated with postoperative opioid administration.<sup>271</sup> In a group of 46 children averaging 43 months of age, oxygen desaturation associated with OSA also has been associated with reduced opioid requirement for analgesia.<sup>29</sup> The mechanisms causing an association between increased frequency of oxygen desaturation and increased sensitivity to opioids remain speculative and may include developmental changes in opioid receptors,<sup>272</sup> pontine cholinergic neurons,<sup>92</sup> or both.

The foregoing clinical data reinforce the need for elucidating the neurochemical mechanisms underlying state-dependent respiratory control. Mouse models also make clear the importance of genetics for respiratory control,<sup>273</sup> even with analyses that quantify breathing as a function of arousal state.<sup>274</sup> Such basic studies also are needed to unmask the cellular and molecular mecha-



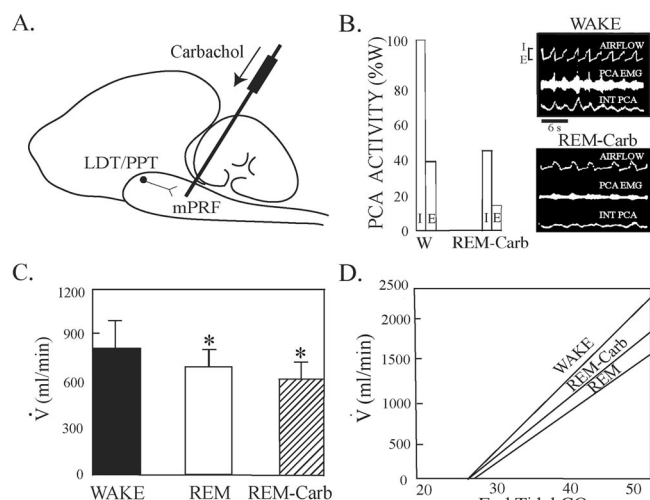

**Fig. 9.** Examples of depressed breathing caused by microinjecting cholinomimetics into the medial pontine reticular formation (mPRF). The brain has no pain receptors, and **A** indicates that cholinomimetics such as carbachol can be microinjected directly into the mPRF of an awake animal. LDT/PPT = laterodorsal and pedunculopontine tegmental. **B** shows electromyographic (EMG) discharge of the laryngeal abductor, the posterior cricoarytenoid (PCA) muscle, during inspiration (I) and expiration (E). The bar graph shows the decrease in PCA discharge during the carbachol-induced rapid eye movement sleep-like state (REM-Carb) compared with wakefulness (W). The right portion of **B** shows PCA muscle tone (electromyogram) during wakefulness and the PCA hypotonia during the REM sleep-like state caused by mPRF injection of the cholinomimetic carbachol. From Lydic *et al.*<sup>278</sup>; used with permission. **C** shows minute ventilation during wakefulness, REM sleep, and REM-Carb. \* Significant decrease below waking levels. From Lydic and Baghdoyan;<sup>277</sup> used with permission. **D** shows arousal state-dependent changes in the hypercapnic ventilatory response. During spontaneous or carbachol-induced REM sleep, there is a significant decrease in the ventilatory response to hypercapnia compared with the waking hypercapnic ventilatory response. From Lydic *et al.*;<sup>482</sup> used with permission.

nisms through which different drugs alter breathing during sleep<sup>275</sup> and sedation.<sup>200</sup> This section is limited to considering evidence that pontine cholinergic systems known to modulate arousal also alter upper airway muscles, ventilation, and the ventilatory response to hypercapnia. Interested readers are referred elsewhere<sup>22,276</sup> for recent reviews of breathing during sleep.

An overview of sleep-dependent depression of skeletal muscle tone was provided earlier in this review. Pontine administration of cholinergic agonists causes IPSPs in spinal motoneurons that are indistinguishable from IPSPs recorded during natural REM sleep.<sup>149</sup> This finding stimulated efforts to determine whether pontine cholinergic neurotransmission also alters upper airway function. Figure 9A schematizes injection of the cholinergic agonist carbachol into the feline medial pontine reticular formation. Microinjections were made while recording electromyographic activity from upper airway muscles of intact, sleeping animals.<sup>277,278</sup> Microinjection of cholinergic agonists into the medial pontine reticular formation caused upper airway muscle hypotonia (fig. 9B). These data were of interest because they demonstrated

significant respiratory modulation from medial regions of the pontine reticular formation regulating sleep but containing no respiratory neurons.<sup>279</sup> Respiratory depression caused by microinjecting cholinergic agonists into the pons was subsequently shown to occur in decerebrate and/or anesthetized animals.<sup>128,280</sup> In intact sleeping animals, microinjection of cholinergic agonists into the medial pontine reticular formation also increases acetylcholine release<sup>98</sup> and significantly decreases minute ventilation (fig. 9C). The cholinergically induced decrease in minute ventilation results primarily from a decrease in frequency of breathing. Human posterior cricoarytenoid muscles also become hypotonic during natural sleep.<sup>281</sup>

Human chemosensitivity is decreased during sleep<sup>22</sup> and anesthesia.<sup>282</sup> Central chemosensitivity now is known to involve many brain regions in addition to the ventrolateral surface of the medulla.<sup>283,284</sup> Enhancing cholinergic neurotransmission in medial pontine reticular formation regions regulating states of consciousness depresses the hypercapnic ventilatory response (fig. 9D). Considered together, the data summarized by figure 9 showed for the first time that many REM sleep-dependent changes in breathing are caused by enhancing cholinergic neurotransmission in the medial pontine reticular formation. The power of the cholinergic model for providing mechanistic insights into the state-dependent respiratory control also is apparent during anesthesia.<sup>280</sup> The implication of these findings is that endogenous acetylcholine in the pontine reticular formation contributes to the respiratory changes characteristic of sleep. Neuroimaging studies of patients with multiple system atrophy suggest that deficits in cholinergic projections from the pons may contribute to their OSA.<sup>285</sup>

Opioids continue to serve as the analgesic drug of choice despite the potential side effect of respiratory depression and being a leading cause of postoperative nausea and vomiting.<sup>286</sup> Administering morphine intrathecally to humans causes a dose-dependent respiratory depression<sup>287</sup> and a centrally mediated depression in the ventilatory response to hypoxia.<sup>288</sup> A number of studies have focused on efforts to identify the brain regions and neurotransmitters through which opioids cause state-dependent respiratory depression. For example, microinjection of opioids into the medial pontine reticular formation causes a  $\mu$  receptor-mediated inhibition of the REM phase of sleep, decreases acetylcholine release in the medial pontine reticular formation, and significantly increases respiratory apneas (reviewed in Lydic *et al.*).<sup>289</sup> The tongue muscle is believed to block the upper airway in many cases of OSA.<sup>290,291</sup> This observation has encouraged efforts to understand the respiratory role of the medullary hypoglossal nucleus.<sup>292,293</sup> Many studies aim to clarify the interaction between pontine regions regulating sleep and the hypoglossal nucleus.<sup>294-298</sup> Microinjection of carbachol into the medial pontine retic-

ular formation increases release of the inhibitory neurotransmitters GABA and glycine in the hypoglossal nucleus.<sup>177</sup> The hypoglossal nucleus contains neurons that synthesize acetylcholine,<sup>299</sup> and hypoglossal motor neurons are stimulated by nicotine<sup>300</sup> and innervated by nitric oxide containing fibers.<sup>301</sup>

Additional neurotransmitters and neuromodulators that alter breathing and states of consciousness include serotonin,<sup>302</sup> hypocretin,<sup>303</sup> and GABA.<sup>304,305</sup> As reviewed elsewhere,<sup>289</sup> serotonin can facilitate respiratory drive to upper airway muscles, and activation of  $\alpha_2$  adrenoreceptors can depress respiratory neurons and the ability to respond to hypercapnia. In human volunteers, the genioglossus muscle is stimulated by a selective serotonin reuptake inhibitor.<sup>306</sup> Hypocretin excites serotonergic neurons in the dorsal raphe nucleus of rat,<sup>307</sup> suggesting a respiratory-facilitatory role for hypocretin. GABAergic systems also have been shown to facilitate or to depress respiratory function. The complexity of state-dependent respiratory control is illustrated by evidence that GABAergic modulation varies as a function of brain region involved<sup>308</sup> and even arousal state. Delivery of a  $\gamma$ -aminobutyric acid type A (GABA<sub>A</sub>) receptor antagonist to the brain stem hypoglossal nucleus causes increases in genioglossus muscle activity during NREM sleep but not during the REM phase of sleep.<sup>309</sup> The foregoing breathing data illustrate the difficulty of developing drugs that will eliminate wakefulness without depressing respiratory control. The next section highlights the role of acetylcholine, adenosine, GABA, monoamines, and hypocretin in regulating states of arousal.

## Arousal States Are Regulated by Multiple Neurotransmitters and Neuromodulators

### *Acetylcholine*

Cholinergic neurotransmission is known to modulate cortical and behavioral levels of arousal. Anesthesiologists were among the first investigators to report the positive correlation between cortical cholinergic neurotransmission and arousal.<sup>310</sup> General anesthetics produce unconsciousness, in part, by disrupting central cholinergic neurotransmission.<sup>49,135,311-313</sup> As noted above, REM sleep also is referred to as paradoxical sleep because the electroencephalographic activation of REM sleep is similar to the electroencephalographic activation of wakefulness. The finding that cortical acetylcholine release is greater during wakefulness and REM sleep than during NREM sleep<sup>314-316</sup> or anesthesia fits well, therefore, with the electroencephalographic activation characteristic of wakefulness and REM sleep. Cortical acetylcholine is essential for maintaining behavioral arousal and normal cognition. Consistent with the clinical effect of opioids to blunt arousal and impair cognition are preclinical data showing that opioids decrease

acetylcholine release in brain regions that promote cortical and behavioral arousal.<sup>231-233</sup>

Intravenous and volatile anesthetic drugs disrupt cholinergic neurotransmission in multiple brain regions. Opioids<sup>233</sup> and ketamine<sup>317</sup> decrease acetylcholine release in pontine reticular formation regions that play a role in generating normal REM sleep. Halothane and isoflurane also depress release of acetylcholine in the pontine reticular formation<sup>58</sup> and electrophysiologic studies show that sevoflurane blocks cholinergic synaptic transmission.<sup>318</sup> Propofol administration to rats decreases cortical acetylcholine release,<sup>319</sup> and in human volunteers, propofol-induced unconsciousness can be reversed with physostigmine.<sup>135</sup> These propofol data are consistent with long-standing preclinical evidence that the acetylcholinesterase inhibitor eserine (physostigmine) causes activation of the cortical electroencephalogram<sup>320</sup> and that intravenous physostigmine enhances the electrographically activated state of REM sleep.<sup>132</sup> Clinical studies demonstrate that cholinomimetics significantly reduce latency to REM sleep onset in normal, human volunteers.<sup>133</sup>

Cholinergic brain stem neurons (LDT/PPT) that project to the thalamus and cortex produce an activated cortical electroencephalogram during wakefulness or REM sleep.<sup>321-323</sup> During the NREM phase of sleep and during halothane anesthesia, decreased pontine cholinergic neurotransmission contributes to deactivation of the cortical electroencephalogram, including spindle generation. Figure 10A illustrates cortical electroencephalographic recordings characteristic of wakefulness, NREM sleep, REM sleep, and halothane anesthesia. In addition to illustrating the similarity in the activated electroencephalogram of wakefulness and REM sleep, figure 10 shows that spindles in the electroencephalogram caused by halothane anesthesia have the same appearance and frequency as NREM sleep spindles. The cellular and molecular bases for electroencephalographic spindle generation are being elucidated to include cholinergic projections from brain stem to centromedian and reticular nuclei of the thalamus.<sup>323-325</sup> During NREM sleep, there is a slowing of discharge in cholinergic neurons that project to thalamus. Functional imaging studies of human brain during anesthesia report that halothane causes a significant decrease in glucose metabolism in the thalamus.<sup>326</sup>

Halothane anesthesia has been shown to cause spindles in the cortical electroencephalogram while decreasing acetylcholine release from pontine cholinergic neurons.<sup>58</sup> The causal, rather than merely correlational, nature of the relation between pontine cholinergic neurotransmission and halothane-induced spindles in the electroencephalogram is illustrated by figure 10B. These data show that the enhanced spindle frequency during halothane anesthesia is significantly reduced by administration of a cholinergic agonist into pontine reticular

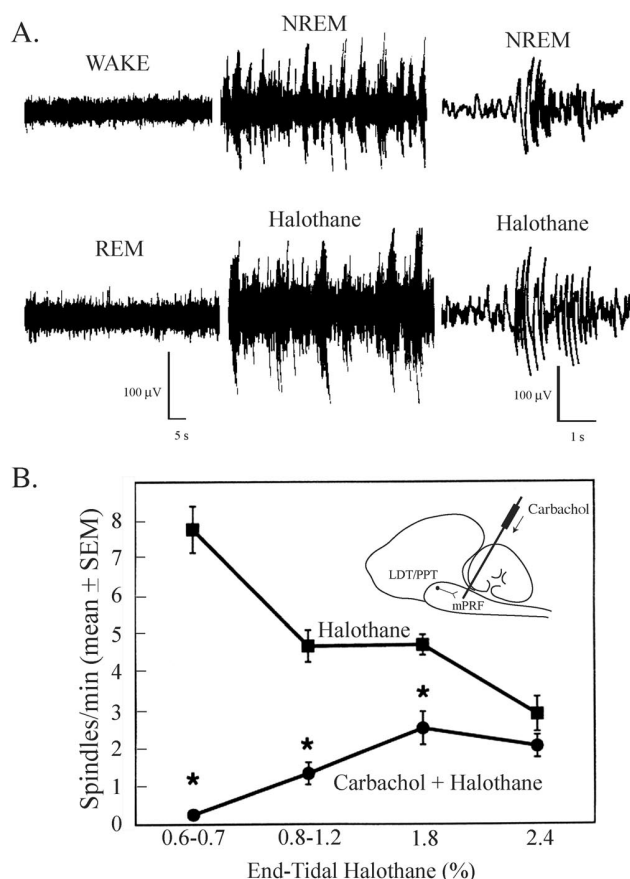

**Fig. 10.** Cholinergic activation of the cortical electroencephalogram during halothane anesthesia. (A) Electroencephalogram recorded from cat during wakefulness (WAKE), non-rapid eye movement (NREM) sleep, rapid eye movement (REM) sleep, and halothane anesthesia. Left upper and lower traces illustrate the similarity in electroencephalogram between wakefulness and REM sleep. Middle upper and lower traces show the similar bursts in the electroencephalogram recorded during NREM sleep and halothane anesthesia. Right upper and lower traces show electroencephalographic recordings at a faster sweep speed to illustrate that waves in the 8- to 14-Hz frequency, referred to as *spindles*, characterize the cortical electroencephalogram during NREM sleep and halothane anesthesia. Therefore, although NREM sleep and halothane anesthesia are different states of consciousness, both states exhibit similar electroencephalographic traits. This trait similarity suggests that an understanding of the neuronal mechanisms generating the electroencephalogram of NREM sleep can help to elucidate neuronal mechanisms regulating the electroencephalogram during anesthesia. (B) Microinjection of carbachol into the medial pontine reticular formation (mPRF) inhibits halothane-induced spindles in the electroencephalogram. Inset illustrates microinjection site for delivery of the cholinergic agonist carbachol into the mPRF. The mPRF receives cholinergic input from the laterodorsal and pedunclopontine tegmental (LDT/PPT) nuclei. Graph plots number of spindles in the electroencephalogram versus end-tidal halothane measured from cat. The two functions show number of spindles in the electroencephalogram during halothane alone and after carbachol microinjection into the mPRF during halothane anesthesia. The key point is that the cortical electroencephalogram is activated by enhancing cholinergic input to the mPRF. During REM sleep and wakefulness, cholinergic output from the LDT/PPT is increased to suppress spindles in the electroencephalogram.<sup>483</sup> These preclinical studies suggest one mechanism potentially underlying the clinical finding<sup>135</sup> that physostigmine can reverse the loss of consciousness produced by propofol. From Keifer *et al.*;<sup>58</sup> used with permission.

formation regions known to activate the cortex and to generate REM sleep. As described in detail elsewhere,<sup>323</sup> the synaptic hyperpolarization of thalamocortical neurons and spindles in the electroencephalogram effectively disconnect the cortex from afferent input, thus helping to maintain states of sleep or anesthesia. This blockade of sensory input at the level of the thalamus helps to explain why arousal thresholds from NREM sleep are higher than from REM sleep. There also are developmental differences in arousal threshold. Children require a greater stimulus to elicit arousal, and this fact has clinical relevance for children with OSA<sup>269</sup> and may relate to the decreased opioid requirement for these children.<sup>29</sup>

This review is focused on pontine cholinergic networks, but it should be noted that basal forebrain cholinergic neurons also contribute to the regulation of arousal<sup>327</sup> and breathing.<sup>328</sup> Microdialysis data indicate that acetylcholine release in the substantia innominata region of the basal forebrain is significantly decreased below waking levels during NREM sleep and increased above waking levels during the cortical activation of REM sleep.<sup>329</sup> Basal forebrain acetylcholine release is significantly enhanced by dialysis delivery of a nitric oxide synthase inhibitor, suggesting that endogenous nitric oxide can modulate basal forebrain levels of acetylcholine.<sup>330</sup>

Consciousness and memory associated with states of sleep and anesthesia are modulated by muscarinic cholinergic receptors.<sup>28,30</sup> Muscarinic receptors of the M1 subtype are located throughout the cortex.<sup>331</sup> Intracellular recordings from cortical neurons during NREM sleep, REM sleep, and wakefulness indicate long-lasting hyperpolarization during NREM sleep, suggesting disfacilitation of thalamocortical synapses by low cholinergic activity.<sup>332</sup> Such disfacilitation would impair higher cortical function. Normal working memory and the regulation of attention and arousal require an intact prefrontal cortex.<sup>333</sup> Sleep deprivation is deleterious to both anesthesiologist and patient because memory and arousal functions subserved by prefrontal cortex are especially vulnerable to sleep deprivation<sup>137,334-336</sup> and anesthesia.<sup>337,338</sup> Muscarinic receptors modulate acetylcholine release and activation of the prefrontal cortical electroencephalogram.<sup>265-268</sup>

### Adenosine

Dephosphorylation of adenosine triphosphate produces adenosine, and all cellular activities that increase metabolic demand will increase adenosine. There is good evidence that the accumulation of adenosine during wakefulness contributes to the drive for sleep<sup>339</sup> and the slow-wave activity in the electroencephalogram that is characteristic of NREM sleep.<sup>340</sup> Adenosine increases REM sleep when injected into the pontine reticular formation of rats<sup>124</sup> and decreases wakefulness when delivered by dialysis into feline LDT/PPT.<sup>341</sup> Adenosine has



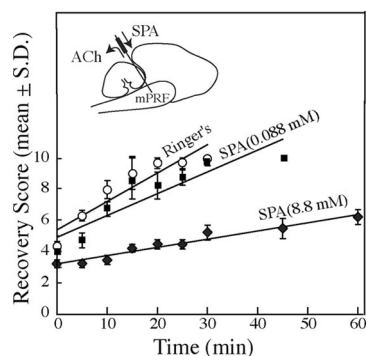

Fig. 11. Recovery from halothane anesthesia in the cat is delayed by administering an adenosine  $A_1$  receptor agonist into the medial pontine reticular formation (mPRF). The three functions plot the time course of recovery from halothane anesthesia during control dialysis (Ringer's) and microdialysis delivery of two levels of the adenosine  $A_1$  receptor agonist  $N^6$ -p-sulphophenyladenosine (SPA). Simultaneous measures revealed that SPA also decreased acetylcholine (ACh) release (not shown). The study from which these data are taken support the interpretation that adenosine  $A_1$  receptors in mPRF regions known to modulate sleep also contribute to generating halothane anesthesia. From Tanase *et al.*,<sup>63</sup> used with permission.

been postulated to function as an endogenous sleep-promoting factor<sup>342</sup> and to facilitate the ability of sleep to restore brain energy metabolism.<sup>343</sup> Blocking local adenosine triphosphate synthesis within the basal forebrain causes an increase in NREM sleep.<sup>344</sup> *N*-methylated xanthine molecules such as caffeine, theobromine, and theophylline all promote arousal. Caffeine increases latency to sleep onset and reduces delta power in the electroencephalogram characteristic of NREM sleep.<sup>345</sup> Four adenosine receptors ( $A_1$ ,  $A_{2a}$ ,  $A_{2b}$ ,  $A_3$ ) have been cloned and the availability of agonists and antagonists have made it possible to begin to specify how these receptors contribute to the regulation of arousal states.<sup>346</sup>

Figure 11 shows that microdialysis delivery of an adenosine  $A_1$  agonist to medial regions of the pontine reticular formation delays recovery from halothane anesthesia while decreasing acetylcholine release.<sup>63</sup> Exogenous adenosine also can enhance the hypnotic effect of intravenous anesthetics. The figure 11 data identify a specific site within the pons<sup>63</sup> where administering an adenosine  $A_1$  agonist delays recovery of wakefulness after anesthesia.<sup>347</sup> The acetylcholine release data are consistent with electrophysiologic evidence showing that adenosine  $A_1$  receptors cause presynaptic disfacilitation<sup>348</sup> and postsynaptic inhibition<sup>349</sup> of cholinergic LDT/PPT neurons. These findings are consistent with the suggestion that activation of adenosine  $A_1$  receptors contributes to isoflurane anesthesia.<sup>350</sup> When rats are deprived of sleep, the anesthesia-induced loss of righting reflex is significantly enhanced.<sup>61</sup> The sleep deprivation-induced shortening of loss of righting was partially blocked by administering adenosine  $A_1$  and  $A_2$  receptor antagonists.<sup>70</sup> These findings are consistent with the hypothesis that adenosinergic mechanisms modulating sleep also

may alter responsiveness to some anesthetics. Depriving children of sleep in hopes of facilitating conscious sedation for therapeutic or diagnostic procedures, however, has not been successful.<sup>289</sup>

Prolonged wakefulness increases rat brain levels of adenosine,<sup>351</sup> and caffeine ingestion by humans increases latency to sleep onset and reduces the electroencephalographic delta power of NREM sleep.<sup>345</sup> Methylxanthines such as theophylline and caffeine are competitive inhibitors of adenosine  $A_1$  and  $A_2$  receptors; therefore, the arousal-promoting action of methylxanthines is consistent with adenosine increasing the drive to sleep. Adenosine inhibits neurons that promote arousal, and systemic administration of adenosine agonists increases NREM sleep.<sup>342,346</sup>

The role of adenosine in pain mechanisms recently has been reviewed.<sup>352</sup> Adenosine also provides a tool for pain management,<sup>353,354</sup> with few side effects when administered intrathecally.<sup>355,356</sup> The mechanisms of adenosine's antinociceptive actions are complex and depend on the type of pain, the location of adenosine administration, and the subtype of adenosine receptor activated. Adenosine decreases opioid and anesthetic requirement.<sup>357,358</sup> Preclinical studies discovered that administering an adenosine  $A_1$  agonist into pontine reticular formation regions regulating sleep also causes antinociception.<sup>62</sup> The small dose of adenosine  $A_1$  agonist injected into the pontine reticular formation caused a surprisingly long duration antinociceptive effect. Site-specific neurochemistry is a recurring theme in this review, and the antinociceptive actions of a systemically administered adenosine  $A_1$  agonist are diminished by spinal cord transection.<sup>359</sup> Adenosine  $A_1$  receptors are coupled to G proteins, which amplify synaptic signaling in the time domain. *In vitro* studies show that G proteins in REM sleep generating regions of the pontine reticular formation are activated by an adenosine  $A_1$  agonist.<sup>360</sup>

### GABA

Many anesthetic and sedating drugs act by increasing conductance at GABA $_A$  receptors.<sup>52,361</sup> Results regarding the presynaptic actions of general anesthetics on amino acid neurotransmitter uptake have been inconsistent. *In vitro* data show that isoflurane and propofol did not alter uptake, binding, or transport of GABA and glutamate.<sup>362</sup> Isoflurane and propofol, however, have been shown to inhibit glutamate and GABA release evoked from cortical synaptosomes.<sup>363</sup> GABA $_A$  and GABA $_C$  receptors are coupled to chloride ion channels, and the GABA $_B$  subtype is a G protein-coupled receptor.<sup>364</sup> Memory depends on normal hippocampal function, and volatile anesthetics accentuate GABA $_A$  transmission in rat hippocampus.<sup>365</sup> GABA agonists have been shown to disrupt synaptic function in developing rat brain, leading to memory and performance impairments.<sup>366</sup> Injection of a GABA $_A$  agonist into rat hippocampus decreased the amount of an-

esthetic needed to induce a loss of righting reflex or motoric response to tail pinch.<sup>367</sup> *In vitro* data show that propofol depresses excitability of hippocampal CA1 neurons by enhancing tonic inhibition mediated by GABA<sub>A</sub> receptors.<sup>368</sup> Ketamine, chloral hydrate, halothane anesthesia, and NREM sleep all decreased the firing rate of wake-active GABAergic neurons in the ventral tegmental area.<sup>369</sup>

Sleep can be enhanced by selectively increasing inhibitory GABAergic neurotransmission in brain regions that generate arousal, such as the posterior hypothalamus, locus coeruleus, and dorsal raphe nucleus (reviewed in Baghdoyan and Lydic<sup>72</sup> and Mallick *et al.*).<sup>370</sup> In the basal forebrain, blocking GABA<sub>A</sub> receptors significantly increases acetylcholine release.<sup>371</sup> This finding is consistent with data showing that direct administration of a GABA<sub>A</sub> agonist into the basal forebrain of rats increases NREM sleep and inhibits wakefulness and REM sleep.<sup>372</sup>

$\gamma$ -Aminobutyric acid-mediated transmission in the medial preoptic area of the hypothalamus modulates arousal. Propofol is thought to act by enhancing GABAergic neurotransmission,<sup>361</sup> and microinjecting propofol into the medial preoptic area of rat hypothalamus leads to an increase in NREM sleep.<sup>373</sup> The sleep-enhancing effects of propofol are blocked by coadministration of the benzodiazepine receptor antagonist flumazenil.<sup>374</sup> Multiple neurotransmitters have been shown to interact with GABAergic systems regulating arousal. For example, the sleep-inducing effects of adenosine microinjected into the medial preoptic area are blocked by flumazenil.<sup>375</sup> Administering the cholinergic agonist carbachol into the medial preoptic area of rats promotes arousal,<sup>376</sup> and the sedative-hypnotic effects of propofol are, in part, cholinergically modulated.<sup>377</sup>

In humans, systemic administration of sedative hypnotics that enhance the actions of GABA increase NREM sleep and decrease REM sleep.<sup>378</sup> Animal studies have shown that the effects of GABAergic drugs on sleep are site dependent with the brain. In rats, microinjecting a GABA<sub>B</sub> receptor agonist, but not agonists for GABA<sub>A</sub> or GABA<sub>C</sub> receptors, into the pedunculopontine tegmental nuclei caused a significant increase in the REM phase of sleep.<sup>379</sup> In regions of the pontine reticular formation that regulate arousal (fig. 2), microinjecting a GABA<sub>A</sub> antagonist enhanced REM sleep, and administering a GABA<sub>A</sub> agonist decreased REM sleep.<sup>380</sup> Microinjection of GABA<sub>B</sub> antagonists and agonists also enhanced and blocked, respectively, REM sleep, but the changes in sleep and wakefulness were of a lesser magnitude than the effects produced by GABA<sub>A</sub> antagonists and agonists.<sup>381</sup> These data, combined with evidence that cholinergic neurotransmission is a contributor to arousal state control (figs. 2, 3, 6, and 7), suggest an interaction between GABA and acetylcholine in the regulation of arousal. The potential for this interaction was demonstrated by data showing that microdialysis delivery of the

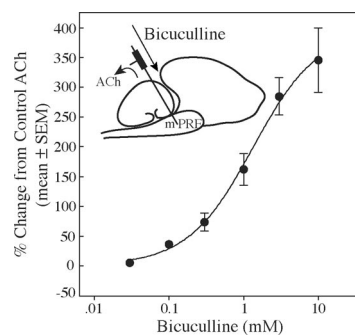

**Fig. 12.** Microdialysis delivery of the  $\gamma$ -aminobutyric acid type A receptor antagonist bicuculline to medial regions of the pontine reticular formation (mPRF) of halothane-anesthetized cat causes a concentration-dependent increase in acetylcholine (ACh) release. Similar studies using intact, unanesthetized animals showed that bicuculline also caused a significant increase in rapid eye movement sleep. From Vazquez and Baghdoyan,<sup>382</sup> used with permission.

GABA<sub>A</sub> receptor antagonist bicuculline to medial regions of the pontine reticular formation caused a concentration-dependent increase in acetylcholine release (fig. 12) that was blocked by the GABA<sub>A</sub> receptor agonist muscimol.<sup>382</sup> Microdialysis delivery of bicuculline to the pontine reticular formation of intact, unanesthetized animals also enhanced REM sleep.<sup>382</sup> These results support the interpretation that GABA<sub>A</sub> receptors in the pontine reticular formation modulate levels of arousal, in part, by altering acetylcholine release. Recent microinjection data also provide strong support for the regulation of arousal by a GABAergic-cholinergic interaction in the pontine reticular formation.<sup>305</sup> The REM sleep-like state evoked by pontine microinjection of carbachol was blocked by pretreatment with muscimol, but the REM sleep-like state evoked by microinjection of bicuculline was not blocked by pretreatment with scopolamine.<sup>305</sup> Taken together, these microinjection and microdialysis data suggest that GABAergic transmission in the pontine reticular formation promotes wakefulness by inhibiting cholinergically activated REM sleep-promoting neurons.<sup>305,382</sup>

The foregoing results demonstrate that the effects of GABAergic drugs on states of arousal vary significantly as a function of the brain region into which GABAergic drugs are administered. These data provide yet another line of support for the view that the mechanisms of drug action on arousal states must be characterized in a brain region-specific manner. Studies aiming to understand the mechanisms through which anesthetic drugs alter arousal or nociception must also be conducted in a site-specific manner. For example, *in vitro* data indicate that in thalamic neurons amobarbital alters specific and restricted membrane ionic currents gated by GABA<sub>A</sub> receptors.<sup>383</sup>

#### Monoamines

As reviewed elsewhere,<sup>22,55,90,384,385</sup> raphe and locus coeruleus neurons discharge maximally during wakeful-

ness, discharge more slowly during NREM sleep, and stop firing during REM sleep. These neuronal activity patterns support the interpretation that serotonin (5-HT)-containing neurons in the midline raphe nuclei and noradrenergic neurons in locus coeruleus contribute to the generation of wakefulness and the inhibition of REM sleep.<sup>72</sup> A REM sleep inhibitory role for serotonin is supported by data showing that knockout mice lacking either 5-HT<sub>1B</sub> receptors<sup>386</sup> or 5-HT<sub>1A</sub> receptors<sup>387</sup> have significantly more REM sleep than wild-type mice. Consistent with these findings are data showing that mice lacking a serotonin transporter gene have decreased REM sleep.<sup>388</sup> These preclinical findings provide an interpretation for the REM sleep reduction caused by antidepressants functioning as serotonin selective reuptake inhibitors.<sup>388</sup>

Rather than exerting a unitary control of wakefulness or sleep, serotonergic neurons are postulated to enhance arousal secondary to promoting motor activity and sensory processing.<sup>389</sup> There is also evidence that 5-HT<sub>2</sub> receptors may modulate the sleep-promoting effects of the cytokine interleukin 1.<sup>390</sup> The potential clinical relevance of serotonergic receptors is illustrated by basic studies showing that selective activation of 5-HT<sub>4</sub>(a) receptors can prevent fentanyl-induced respiratory depression without loss of analgesia.<sup>391</sup>

Consistent with the sleep-dependent firing rate of locus coeruleus neurons, norepinephrine levels in the locus coeruleus progressively decrease during the transitions from wakefulness, to NREM sleep, and NREM sleep to REM sleep.<sup>385,392</sup> The three groups of adrenergic receptors and (subtypes) are comprised of  $\alpha_1$  (1a, 1b, 1d),  $\alpha_2$  (2a, 2b, 2c), and  $\beta$  adrenoceptors (1, 2, 3).<sup>393</sup> The  $\alpha_2$  agonist dexmedetomidine has a sedative-hypnotic action that is mediated by the locus coeruleus,<sup>394</sup> consistent with its utility in clinical anesthesia.<sup>395</sup> Neurons are hyperpolarized by many anesthetic agents,<sup>396</sup> and inhibiting the discharge of wake-promoting neurons results in the loss of wakefulness. There is good evidence that noradrenergic transmission contributes to the generation of general anesthesia and sleep.<sup>397</sup> The sedative actions of dexmedetomidine are diminished by lesions of hypothalamic regions contributing to NREM sleep,<sup>398</sup> consistent with norepinephrine being relevant for both sleep and anesthesia.<sup>64</sup> The complexity of multiple transmitters interacting to modulate states of arousal is again demonstrated by the finding that  $\alpha_1$  and  $\alpha_2$  adrenoceptors in the pontine dorsal raphe nucleus modulate the release of serotonin.<sup>399</sup> In mice, targeted disruption of the gene for dopamine  $\beta$ -hydroxylase, the enzyme converting dopamine to norepinephrine, caused decreases in brain-activated states of wakefulness and REM sleep. These results are consistent with the view that noradrenergic neurotransmission contributes to the generation of wakefulness and REM sleep.<sup>400</sup>

A large body of evidence supports a role for histamine

in the maintenance of wakefulness.<sup>401</sup> Similar to serotonergic and noradrenergic neurons described above, histaminergic neurons within the posterior hypothalamus have long been known to show a selective, wake-on/REM-off discharge pattern.<sup>402,403</sup> These histaminergic neurons project to many arousal-promoting nuclei and excite other monoaminergic and cholinergic neurons by activating H1, H2, and H3 receptors. For example, microinjecting an H1 receptor agonist into the LDT decreases cortical slow wave activity and increases wakefulness.<sup>404</sup> Knockout mice lacking the synthetic enzyme for histamine show an increase in REM sleep and a slowing of the electroencephalogram during wakefulness.<sup>405</sup>

Multiple lines of evidence illustrate the importance of dopamine for regulation of arousal and affective states. For example, substance abuse is a significant occupational hazard for anesthesiologists.<sup>406–408</sup> Dopaminergic reward circuits underlie both addiction<sup>409,410</sup> and the pharmacologic treatment of drug withdrawal.<sup>411</sup> Dopamine agonists enhance vigilance and performance.<sup>412</sup> To date, five subtypes of G protein-coupled dopamine receptors (D1–D5) have been identified.<sup>413</sup> In rats, wakefulness is enhanced by systemic<sup>414</sup> or intracerebroventricular<sup>415</sup> administration of dopamine D1 and D2 receptor agonists.

Dopamine contributes to the regulation of sleep through mechanisms that have not yet been elucidated. Approximately two thirds of patients with Parkinson disease have excessive daytime sleepiness, parasomnias, or difficulty initiating and maintaining sleep.<sup>416</sup> The Standards of Practice Committee of the American Academy of Sleep Medicine notes that restless legs syndrome and periodic limb movement disorder are most successfully treated with dopaminergic drugs.<sup>417</sup>

Dopamine levels are modulated by presynaptic dopamine autoreceptors and by a dopamine transporter. In mice, deletion of the dopamine transporter gene caused increased wakefulness, decreased NREM sleep, and rendered these mice unresponsive to the arousal-promoting actions of methamphetamine and modafinil.<sup>418</sup> The drug modafinil has U.S. Food and Drug Administration approval for treating the excessive daytime sleepiness of narcolepsy. The mechanisms of action of modafinil remain unknown, and the pharmacologic profile of modafinil differs from sympathomimetic amines. Recent studies report that modafinil significantly enhances wakefulness after general anesthesia.<sup>32</sup>

The specific brain nuclei and synaptic mechanisms by which dopamine alters sleep and enhances arousal are not yet clear.<sup>419</sup> Studies which used early immediate gene (c-fos) expression as an index of neural activity, combined with immunostaining for tyrosine hydroxylase, report that dopamine neurons in the ventral tegmental nucleus revealed greatest Fos expression during recovery from REM sleep deprivation.<sup>420</sup> Microdialysis measures of dopamine from locus coeruleus and amy-



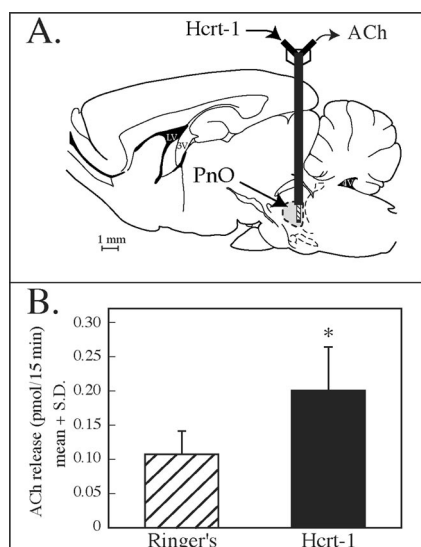

**Fig. 13.** Acetylcholine (ACh) release in the pontine reticular formation of isoflurane-anesthetized rat is increased by microdialysis delivery of the peptide hypocretin-1 (Hcrt-1). (A) Sagittal schematic of rat brain (rostral to left) illustrating placement of a microdialysis probe into the pontine reticular nucleus, oral part (PnO). (B) Endogenously released acetylcholine was measured during dialysis delivery of hypocretin-1. These results are consistent with the possibility that hypocretin modulates arousal, in part, by altering acetylcholine release in the pontine reticular formation. Data in B are from Bernard *et al.*,<sup>239</sup> used with permission.

dala across the feline sleep cycle found no significant alterations in dopamine release.<sup>392</sup> However, in rat prefrontal cortex, basal levels of dopamine are greater during the dark phase (when rats are active) than during the light phase (when rats spend more time sleeping).<sup>421</sup>

### Hypocretin/Orexin

The discovery that hypocretin-1 and hypocretin-2 (also known as orexin A and orexin B) are arousal-promoting peptides produced by lateral hypothalamic neurons has stimulated efforts to specify the role of hypocretins in motor control.<sup>422,423</sup> These efforts are based on findings suggesting that defects in the hypocretin system may play a causal role in human and animal narcolepsy.<sup>424–427</sup> Pontine administration of hypocretin has been shown to alter muscle tone in decerebrate rats.<sup>428</sup> Microinjection of hypocretin into the trigeminal motor nucleus or hypoglossal nucleus of decerebrate cats increased muscle activity in the masseter and genioglossus muscles, respectively.<sup>429</sup> The locus coeruleus receives the most prominent extrahypothalamic hypocretinergeric innervation of all brain regions studied,<sup>422,423</sup> and descending projections from locus coeruleus enhance motoneuron excitability.<sup>430</sup> In decerebrate rats, muscle tone was increased when hypocretin was administered into locus

coeruleus, and muscle tone decreased when hypocretin was administered into pontine reticular formation.<sup>428</sup> *In vitro* studies of rat cortex indicate that norepinephrine release is increased by hypocretin-1 and hypocretin-2.<sup>431</sup>

Many studies are evaluating the potential relevance for arousal state control of the hypocretin peptides. Administering hypocretin-1 into the locus coeruleus<sup>432</sup> or basal forebrain of rats increases wakefulness,<sup>433</sup> and intraventricular administration of hypocretin-1 caused activation of the electroencephalogram in rats anesthetized with isoflurane.<sup>434</sup> Additional data suggest that hypocretinergeric neurons may contribute to the mechanisms underlying barbiturate anesthesia.<sup>435</sup> Relevant to the topic of pontine cholinergic modulation of arousal, figure 13 shows that hypocretin-1 enhances acetylcholine release in the pontine reticular formation of rats.<sup>239</sup> This finding fits with evidence that hypocretin-1 facilitates synaptic activity in the pontine reticular formation<sup>303</sup> and is consistent with the possibility that hypocretin may promote arousal, in part, by enhancing cholinergic neurotransmission.

## Conclusions: Gaps in Knowledge as Opportunities for Research

The U.S. National Institutes of Health has made available a plan for accelerating medical discovery and improving health.<sup>†</sup> The National Institutes of Health plan places special emphasis on translating basic research into clinical application. The neurobiology of arousal state control is a crosscutting research theme directly relevant for sleep disorders medicine and anesthesiology. The concluding sections highlight three areas where gaps in knowledge magnify the disease burden and, by definition, provide opportunities for translational research.

### Information Systems and Functional Genomics of Arousal State Control

The ability to create in real time a complete, digital, anesthesia record offers a powerful tool for translational research. The large amount of human physiologic information that can be synthesized by digital information systems has the potential to provide anesthesiology with unique patient data for phenotyping comorbidities.<sup>‡</sup> These information systems also give anesthesiology a special opportunity for developing a functional genomics that can link genetic factors to anesthesia outcome.<sup>436</sup>

Developing a functional genomics of arousal state control will depend on a viable dialogue between basic and clinical research. Anesthesiology has successfully used the ability of preclinical models to unmask basic mechanisms that can be translated into clinical relevance.<sup>437</sup> The power of mouse models for characterizing genetic regulation of anesthetic susceptibility was appreciated many years ago.<sup>438</sup> Those pioneering studies presaged the recent sequencing of the mouse genome. The mouse

<sup>†</sup> [www.nih.gov/news/pr/oct2004/od-04.htm](http://www.nih.gov/news/pr/oct2004/od-04.htm). Accessed December 5, 2004.

<sup>‡</sup> [www.gasnet.org/aims/oreilly.php](http://www.gasnet.org/aims/oreilly.php). Accessed December 5, 2004.

genome was first published in December 2002 and revealed a 99% homology with the human genome.<sup>439</sup> This homology means that preclinical studies using mice can significantly advance understanding of human disease.<sup>440,441</sup> The foregoing factors have led to the view that the mouse is "the most important animal model in biomedical research."<sup>§</sup> Sleep varies significantly among mouse strains<sup>442-444</sup> and, given the high degree of genetic homology, it is not surprising that human sleep is a heritable phenotype.<sup>445,446</sup> Inbred strains of mice exhibit significant variability in response to anesthesia,<sup>447</sup> and human perioperative outcome varies significantly as a function of genotype.<sup>436</sup> The importance of genetic factors regulating sleep is illustrated by the finding that a single gene mutation in fruit flies produces a short-sleeping phenotype with a reduced lifespan.<sup>448</sup> Multiple studies now indicate that pontine cholinergic neurotransmission is a lower level phenotype modulating the higher level phenotype of sleep<sup>105,108</sup> and sleep-dependent alterations in breathing.<sup>130,449</sup> Ideally, patient data gleaned from automated information systems can be used to plan preclinical studies seeking to elucidate mechanisms regulating arousal states and contributing to state-dependent pathophysiology.

#### *Sleep and Anesthesia in Elderly Patients*

Elderly patients will comprise an increasing caseload for anesthesiology. In the United States, the number of persons aged 65 yr and older was estimated at 33.5 million in 1995, 34.7 million in 2000, and 79 million (20% of the population) by 2050.<sup>450</sup> From midlife to the eighth decade of life, total sleep time decreases by an average of 27 min/decade.<sup>451</sup> One cross-sectional study showed that more than one third of the elderly had sleep problems.<sup>452</sup> Sleep disorders have been described as one of the most pervasive and poorly addressed problems of aging.<sup>453</sup> Postoperative delirium is common in older patients,<sup>454,455</sup> even in the absence of neurodegenerative disorders.<sup>456</sup> Postoperative delirium is known to be associated with medical comorbidity, increased mortality, and decreased ability to live independently after discharge.<sup>457</sup> Delirium can have many causes,<sup>458</sup> resulting in a wide range of altered arousal states.<sup>208</sup>

The foregoing clinical data have prompted basic studies aiming to understand the contribution of cholinergic neurotransmission to the regulation of cortical arousal. Prefrontal cortex contributes to regulation of arousal and orientation (fig. 1). Studies in mice show that presynaptic and postsynaptic muscarinic cholinergic receptors help to regulate excitability of prefrontal cortex.<sup>266-268</sup> Additional mouse data show that pontine cholinergic neurotransmission significantly alters breathing and cortical acetylcholine release during anesthesia.<sup>265</sup> The National Institutes of Health maintains a colony of aged

mice that can be acquired by extramural investigators. Characterizing age-related changes for multiple neurotransmitters across multiple arousal states will help to clarify changes in sleep and responsiveness to anesthetics observed in older patients.

#### *Obesity Alters Arousal and Autonomic Control*

Obesity is directly relevant for sleep, anesthesiology, and the regulation of arousal states. The ongoing obesity epidemic has prompted both the World Health Organization and the National Institutes of Health to develop task forces to identify causes and countermeasures for obesity.<sup>459</sup> Obesity is a disease<sup>460</sup> with adverse health effects, and the American Society for Bariatric Surgery estimated that in 2003, more than 100,000 patients elected stomach reduction surgery in an effort to treat their obesity. Some of the clinical features and implications of obesity for anesthesia and intensive care unit patients have been reviewed.<sup>461</sup> In young adults, obesity is associated with short sleep duration, and short sleep duration is a risk factor for diabetes and heart disease.<sup>462</sup> Obesity also increases the likelihood of OSA,<sup>463</sup> and upper airway muscle function is particularly sensitive to depression by anesthetic agents.<sup>464</sup> There is a significant interaction between sleep and the immune system,<sup>152,153,465,466</sup> and obesity is a risk factor for surgical site infection.<sup>467</sup> In 2003, U.S. medical expenditures attributed to obesity and associated chronic disease were estimated at \$75 billion.<sup>468</sup> Poor physical fitness is a modifiable risk factor, and exercise capacity has been shown to be a powerful predictor of mortality.<sup>469</sup>

Brain regions controlling appetite also contribute to the regulation of sleep and state-dependent changes in autonomic control. Appetite is regulated, in part, by a group of hormones that feed back to the arcuate nucleus of the hypothalamus to control food intake. Leptin is an adipocyte-derived cytokine that normally functions to decrease food intake and maintain energy homeostasis.<sup>470</sup> There is good agreement between clinical and preclinical data showing a relation among leptin, sleep, and breathing.<sup>17</sup> Patients with OSA have higher levels of serum leptin,<sup>471</sup> but common human obesity is associated with leptin resistance.<sup>472</sup> Epidemiologic data reveal a relation between the apnea-hypopnea index and serum leptin levels, consistent with the possibility that sleep apnea may suppress leptin secretion.<sup>473</sup> Considerable data support the hypothesis that sleep apnea may be a manifestation of a feed-forward metabolic syndrome in which visceral obesity increases insulin resistance and inflammatory cytokines.<sup>18</sup> Rats selectively bred for low aerobic capacity do score high on risk factors for the metabolic syndrome.<sup>474</sup> Studies of mutant mice reveal a transcription factor (*Clock*) that modulates the circadian distribution of sleep and may also contribute to obesity and metabolic syndrome.<sup>475</sup>

Leptin-deficient mice are obese, have diminished mo-

§ [www.genome.gov/10005831](http://www.genome.gov/10005831). Accessed December 5, 2002.

tor activity, and have a depressed ability to generate an appropriate ventilatory response to hypercapnia.<sup>476</sup> Sleep exacerbates the depressed breathing of these obese mice, and chronic leptin replacement reduces food intake, increases tidal volume and respiratory rate during REM sleep, and increases the ventilatory response to carbon dioxide challenge.<sup>477</sup> Interestingly, the arousal promoting peptide hypocretin is down-regulated in the hypothalamus of obese mice.<sup>478</sup> Obese leptin-deficient mice also have a different ventilatory and sleep response to pontine administration of neostigmine compared with C57BL/6J mice.<sup>449</sup> The brain sites and neurotransmitters through which leptin modulates breathing are currently unknown.<sup>479</sup>

The data highlighted in this review provide a rationale for translational research focused on endogenous molecules that regulate arousal and energy homeostasis. Anesthesia patients routinely give investigators the ability to sample serum and cerebrospinal fluid. Ready access to blood and cerebrospinal fluid provides the potential for targeted assays of arousal-regulating molecules. Ultimately, relational databases linking molecular profiles to patient data will contribute to a molecular characterization of anesthetic states and sleep disorders.

The authors thank Mary A. Norat (Research Associate) for editorial assistance. They also thank Flavia Consens, M.D. (Assistant Professor, Department of Neurology, University of Michigan, Ann Arbor, Michigan), for providing figure 8.

## References

- Howard SK, Rosekind MR, Katz JD, Berry AJ: Fatigue in anesthesia: Implications and strategies for patient and provider safety. *ANESTHESIOLOGY* 2002; 97:1281-94
- Weinger MB, Ancoli-Israel S: Sleep deprivation and clinical performance. *JAMA* 2002; 287:955-7
- Veasey SC, Rosen R, Barzansky B, Rosen I, Owens JA: Sleep loss and fatigue in residency training. *JAMA* 2002; 288:1116-24
- Buysse DJ, Barzansky B, Dinges DF, Hogan E, Hunt CE, Owens J, Rosekind M, Rosen R, Simon F, Veasey S, West F: Sleep, fatigue, and medical training: Setting an agenda for optimal learning and patient care. *Sleep* 2003; 26:218-25
- Lockley SW, Cronin JW, Evans EE, Cade BE, Lee CJ, Landrigan CP, Rothschild JM, Katz JT, Lilly CM, Stone PH, Aeschbach D, Czeisler CA: Effect of reducing interns' weekly work hours on sleep and attentional failures. *N Engl J Med* 2004; 351:1829-37
- Landrigan CP, Rothschild JM, Cronin JW, Kaushal R, Burdick E, Katz JT, Lilly CM, Stone PH, Lockley SW, Bates DW, Czeisler CA: Effect of reducing intern's work hours on serious medical errors in intensive care units. *N Engl J Med* 2004; 351:1838-48
- Cassidy CJ, Griffiths E, Smith AF: Safety in sleep: Anaesthetists, patients, and the European working time directive. *Anaesthesia* 2004; 59:841-3
- Balwin DC, Daugherty SR: Sleep deprivation and fatigue in residency training: Results of a national survey of first- and second-year residents. *Sleep* 2004; 27:217-23
- Barger LK, Cade BE, Ayas NT, Cronin JW, Rosner B, Speizer FE, Czeisler CA: Extended work shifts and the risk of motor vehicle crashes among interns. *N Engl J Med* 2005; 352:125-34
- Murray D, Dodds C: The effect of sleep disruption on performance of anaesthetists: A pilot study. *Anaesthesia* 2003; 58:520-5
- Durmer JS, Dinges DF: Neurocognitive consequences of sleep deprivation. *Semin Neurol* 2005; 25:117-29
- Gander PH, Merry A, Millar MM, Weller J: Hours of work and fatigue-related error: A survey of New Zealand Anaesthetists. *Anaesth Intensive Care* 2000; 28:178-83
- Gaba DM, Howard SK: Patient safety: Fatigue among clinicians and the safety of patients. *N Engl J Med* 2002; 347:1249-55
- Halbach MM, Spann CO, Egan G: Effect of sleep deprivation on medical resident and student cognitive function: A prospective study. *Am J Obstet Gynecol* 2003; 188:1198-201
- Howard SK, Gaba DM, Smith BE, Weinger MB, Herndon C, Keshavacharya S, Rosekind MR: Simulation study of rested *versus* sleep-deprived anesthesiologists. *ANESTHESIOLOGY* 2003; 98:1345-55
- van Dongen HP, Maislin G, Mullington JM, Dinges DF: The cumulative cost of additional wakefulness: Dose-response effects on neurobehavioral functions and sleep physiology from chronic sleep restriction and total sleep deprivation. *Sleep* 2003; 26:117-26
- Spiegel K, Leproult R, L'Hermite-Baleriaux M, Copinschi G, Penev PD, VanCauter E: Leptin levels are dependent on sleep duration: Relationship with sympathovagal balance, carbohydrate regulation, cortisol, and thyrotropin. *J Clin Endo Metab* 2004; 89:5762-71
- Vgontzas AN, Bixler EO, Chrousos GP: Sleep apnea is a manifestation of the metabolic syndrome. *Sleep Med Rev* 2005; 9:211-24
- Kohn LT, Corrigan J, Donaldson MS, Richardson WC: To Err is Human: Building a Safer Health System. Washington, D.C., National Academy Press, 2000, pp 1-312
- Lydic R: The central regulation of sleep and autonomic physiology, *The Clinical Physiology of Sleep*. Edited by Lydic R, Biebuyck JF. Bethesda, American Physiological Society, 1988, pp 1-20
- Dement WC, Mitler M: It's time to wake up to the importance of sleep disorders. *JAMA* 1993; 269:1548-50
- Kryger MH, Roth T, Dement WC: Principles and Practice of Sleep Medicine, 4th edition. Philadelphia, Elsevier Saunders, 2005, pp 1-1517
- Loadsmann JA, Wilcox I: Is obstructive sleep apnoea a rapid eye movement-predominant phenomenon? *Br J Anaesth* 2000; 85:354-8
- Loadsmann JA, Hillman DR: Anaesthesia and sleep apnoea. *Br J Anaesth* 2001; 86:254-66
- Chung F, Imarengiaye C: Management of sleep apnea in adults. *Can J Anesth* 2002; 49:R1-6
- Lichter JL, Alessi R, Lane BS: Sleep tendency as a measure of recovery after drugs used for ambulatory surgery. *ANESTHESIOLOGY* 2002; 96:878-83
- Wu A, Drummond GB: Sleep arousal after lower abdominal surgery and relation to recovery from respiratory obstruction. *ANESTHESIOLOGY* 2003; 99:1295-302
- Fiset P: Research on anesthesia, consciousness or both? Understanding our anesthetic drugs and defining the neural substrate. *Can J Anesth* 2003; 50:R1-5
- Brown KA, Lafemere BA, Moss IR: Recurrent hypoxemia in young children with obstructive sleep apnea is associated with reduced opioid requirement for analgesia. *ANESTHESIOLOGY* 2004; 100:806-10
- Backman SB, Fiset P, Plourde G: Cholinergic mechanisms mediating anesthetic induced altered states of consciousness. *Prog Brain Res* 2004; 145:197-206
- den Herdner C, Schmeck J, Appleboom DJK, de Vries N: Risk of general anaesthesia in people with obstructive sleep apnoea. *BMJ* 2004; 329:955-9
- Larijani GE, Goldberg ME, Hojat M, Khaleghi B, Dunn JB, Marr AT: Modafinil improves recovery after general anesthesia. *Anesth Analg* 2004; 98:976-81
- Aserinsky E, Kleitman N: Regularly occurring periods of eye motility, and concomitant phenomena, during sleep. *Science* 1953; 118:273-4
- Borbely AA: A two process model of sleep regulation. *Human Neurobiol* 1982; 1:195-204
- Aldrich MS: Sleep Medicine. New York, Oxford University Press, 1999, pp 1-382
- Lydic R, Baghdoyan HA, Hibbard L, Bonyak EV, DeJoseph MR, Hawkins RA: Regional brain glucose metabolism is altered during rapid eye movement sleep in the cat: A preliminary study. *J Comp Neurol* 1991; 304:517-29
- Maquet P, Peters J-M, Aerts J, Delfiore G, Degueldre C, Luxen A, Franck G: Functional neuroanatomy of human rapid-eye-movement sleep and dreaming. *Nature* 1996; 383:163-6
- Braun AR, Balkin TJ, Wesenten NJ, Carson RE, Varga M, Baldwin P, Selbie S, Belenky G, Herscovitch P: Regional cerebral blood flow throughout the sleep-wake cycle: An H<sub>2</sub> <sup>15</sup>O PET study. *Brain* 1997; 120:1173-97
- Nofzinger EA: Neuroimaging and sleep medicine. *Sleep Med Rev* 2005; 9:157-72
- Stickgold R, Hobson JA, Fosse R, Fosse M: Sleep, learning, and dreams: Off-line memory reprocessing. *Science* 2001; 294:1052-7
- Jouvet M: Paradoxical sleep: A study of its nature and mechanisms. *Prog Brain Res* 1965; 18:20-57
- Jouvet M: The role of monoamines and acetylcholine-containing neurons in the regulation of the sleep-waking cycle. *Ergeb Physiol* 1972; 64:166-307
- Karczmar AG, Longo VG, De Carolis AS: A pharmacological model of paradoxical sleep: The role of cholinergic and monoamine systems. *Physiol Behav* 1970; 5:175-82
- McCarley RW, Hobson JA: Neuronal excitability modulation over the sleep cycle: A structural and mathematical model. *Science* 1975; 189:58-60
- Daan S, Beersma DGM, Borbely AA: Timing of human sleep: Recovery process gated by a circadian pacemaker. *Am J Physiol* 1984; 246:R161-78
- McCarley RW, Massaquoi SG: A limit cycle mathematical model of the REM sleep oscillatory system. *Am J Physiol* 1986; 251:R1011-29
- Hobson JA, Lydic R, Baghdoyan HA: Evolving concepts of sleep cycle generation: From brain centers to neuronal populations. *Behav Brain Sci* 1986; 9:371-448
- Richards CD: In search of the mechanisms of anaesthesia. *Trends Neurosci* 1980; 3:9-13
- Lydic R, Baghdoyan HA: Cholinergic contributions to the control of con-



- sciousness, Anesthesia: Biologic Foundations. Edited by Yaksh T, Lynch C, Zapol WM, Maze M, Biebuyck JF, Saidman LJ. New York, Lippincott-Raven, 1998, pp 433-50
50. Sawamura S, Kingery WS, Davies MF, Agashe GS, Clark JD, Kobilka BK, Hashimoto T, Maze M: Antinociceptive action of nitrous oxide is mediated by stimulation of noradrenergic neurons in brainstem and activation of  $\alpha 2B$  adrenoceptors. *J Neurosci* 2000; 20:9242-51
  51. Urban BW: Current assessment of targets and theories of anaesthesia. *Br J Anaesth* 2002; 89:167-183
  52. Campagna JA, Miller KW, Forman SA: Mechanisms of inhaled anesthetics. *N Engl J Med* 2003; 348:2110-24
  53. Lydic R: Fact and fantasy about sleep and anesthesiology. *ANESTHESIOLOGY* 2002; 97:1050-1
  54. Shafer A: Metaphor and anesthesia. *ANESTHESIOLOGY* 1995; 83:1331-42
  55. Lydic R, Baghdoyan HA: Handbook of Behavioral State Control: Cellular and Molecular Mechanisms. Boca Raton, Florida, CRC, 1999, pp 1-700
  56. Lydic R, Biebuyck JF: Sleep neurobiology: Relevance for mechanistic studies of anaesthesia. *Br J Anaesth* 1994; 72:506-8
  57. Lydic R: Reticular modulation of breathing during sleep and anesthesia. *Curr Opin Pulm Med* 1996; 2:474-81
  58. Keifer JC, Baghdoyan HA, Lydic R: Pontine cholinergic mechanisms modulate the cortical electroencephalographic spindles of halothane anesthesia. *ANESTHESIOLOGY* 1996; 84:945-54
  59. Kshatri AM, Baghdoyan HA, Lydic R: Cholinomimetics, but not morphine, increase antinociceptive behavior from pontine reticular regions regulating rapid eye movement sleep. *Sleep* 1998; 21:677-85
  60. Tung A, Lynch JP, Mendelson WB: Prolonged sedation with propofol in the rat does not result in sleep deprivation. *Anesth Analg* 2001; 92:1232-6
  61. Tung A, Szafran MJ, Bluhm B, Mendelson WB: Sleep deprivation potentiates the onset and duration of loss of righting reflex induced by propofol and isoflurane. *ANESTHESIOLOGY* 2002; 97:906-11
  62. Tanase D, Baghdoyan HA, Lydic R: Microinjection of an adenosine  $A_1$  agonist into the medial pontine reticular formation increases tail flick latency to thermal stimulation. *ANESTHESIOLOGY* 2002; 97:1597-601
  63. Tanase D, Baghdoyan HA, Lydic R: Dialysis delivery of an adenosine  $A_1$  receptor agonist to the pontine reticular formation decreases acetylcholine release and increases anesthesia recovery time. *ANESTHESIOLOGY* 2003; 98:912-20
  64. Nelson LE, Lu J, Guo T, Saper CB, Franks NP, Maze MB: The  $\alpha_2$ -adrenoreceptor agonist dexmedetomidine converges on an endogenous sleep-promoting pathway to exert its sedative effects. *ANESTHESIOLOGY* 2003; 98:428-36
  65. DeMarco GJ, Baghdoyan HA, Lydic R: Differential cholinergic activation of G proteins in rat and mouse brainstem: Relevance for sleep and nociception. *J Comp Neurol* 2003; 457:175-84
  66. Patel S, Wohlfeil ER, Rademacher DJ, Carrier EJ, Perry LJ, Kundu A, Flack JR, Nithipatikom K, Campbell WB, Hillard CJ: The general anesthetic propofol increases brain N-arachidonyl ethanolamine (anandamide) content and inhibits fatty acid amide hydrolase. *Br J Pharm* 2003; 139:1005-13
  67. Hudetz AG, Wood JD, Kampine JP: Cholinergic reversal of isoflurane anesthesia in rats as measured by cross-approximate entropy of the electroencephalogram. *ANESTHESIOLOGY* 2003; 99:1125-31
  68. Tung A, Mendelson WB: Anesthesia and sleep. *Sleep Med Rev* 2004; 8:213-25
  69. Tung A, Bergmann BM, Herrera S, Cao D, Mendelson WB: Recovery from sleep deprivation occurs during propofol anesthesia. *ANESTHESIOLOGY* 2004; 100:1419-26
  70. Tung A, Herrera S, Szafran MJ, Kasza K, Mendelson WB: Effect of sleep deprivation on righting reflex in the rat is partially reversed by administration of adenosine  $A_1$  and  $A_2$  receptor antagonists. *ANESTHESIOLOGY* 2005; 102:1158-64
  71. Haymaker W, Schiller F: The Founders of Neurology, 2nd edition. Springfield, Illinois, Charles C. Thomas, 1970, pp 1-640
  72. Baghdoyan HA, Lydic R: Neurotransmitters and neuromodulators regulating sleep. *Sleep and Epilepsy: The Clinical Spectrum*. Edited by Bazil C, Malow B, Sammaritano M. New York, Elsevier Science, 2002, pp 17-44
  73. Mallick BN, Inoué S: Rapid Eye Movement Sleep. New Delhi, Narosa Publishing House, 1999, pp 1-419
  74. Saper CB, Chou TC, Scammell TE: The sleep switch: Hypothalamic control of sleep and wakefulness. *Trends Neurosci* 2001; 24:726-31
  75. Reinos-Suarez F, de Andrés I, Rodrigo-Angulo ML, Garzón M: Brain structures and mechanisms involved in the generation of REM sleep. *Sleep Med Rev* 2001; 5:63-77
  76. McGinty D, Szymusiak R: Brain structures and mechanisms involved in the generation of NREM sleep: Focus on the preoptic hypothalamus. *Sleep Med Rev* 2001; 5:323-42
  77. Hobson JA, Pace-Schott EF: The cognitive neuroscience of sleep: Neuronal systems, consciousness and learning. *Nature Rev Neurosci* 2002; 3:679-93
  78. Haxhiu MA, Mack SO, Wilson CG, Feng P, Strohl KP: Sleep networks and the anatomic and physiologic connections with respiratory control. *Front Biosci* 2003; 8:d946-62
  79. Nofzinger EA: Functional neuroimaging of sleep. *Semin Neurol* 2005; 25:9-18
  80. Jouvet M: Recherches sur les structures nerveuses et les mécanismes responsables des différentes phases du sommeil physiologique. *Arch Ital Biol* 1962; 100:125-206
  81. Webster HH, Jones BE: Neurotoxic lesions of the dorsolateral pontomesencephalic tegmentum-cholinergic cell area in the cat: II. Effects upon sleep-waking states. *Brain Res* 1988; 458:285-302
  82. Lavie P, Pratt H, Scharf B, Peled R, Brown J: Localized pontine lesion: Nearly total absence of REM sleep. *Neurology* 1984; 34:118-20
  83. Gironell A, de la Calzada MD, Sagales T, Barraquer-Bordas L: Absence of REM sleep and altered non-REM sleep caused by haematoma in the pontine tegmentum. *J Neurol Neurosurg Psychiatry* 1995; 59:195-6
  84. Kimura K, Tachibana N, Kohyama J, Otsuka Y, Fukozawa S, Waki R: A discrete pontine ischemic lesion could cause REM sleep behavior disorder. *Neurology* 2000; 55:894-5
  85. Autret A, Laffont F, de Toffol B, Cathala HP: A syndrome of REM and non-REM sleep reduction and lateral gaze paresis after medial tegmental pontine stroke: Computed tomographic scans and anatomical correlations in four patients. *Arch Neurol* 1989; 45:1236-42
  86. Kushida CA, Rye DB, Nummy D, Milton JG, Spire JP, Rechtschaffen A: Cortical asymmetry of REM sleep EEG following unilateral pontine hemorrhage. *Neurology* 1991; 41:598-601
  87. Jones BE, Beaudet A: Distribution of acetylcholine and catecholamine neurons in the cat brainstem: A choline acetyltransferase and tyrosine hydroxylase immunohistochemical study. *J Comp Neurol* 1987; 261:15-32
  88. Mitani A, Ito K, Hallanger A, Wainer B, Kataoka K, McCarley R: Cholinergic projections from the laterodorsal and pedunculopontine tegmental nuclei to the pontine gigantocellular tegmental field in the cat. *Brain Res* 1988; 451:397-402
  89. Shiromani PJ, Armstrong DM, Gillin JC: Cholinergic neurons from the dorsolateral pons project to the medial pons: A WGA-HRP and choline acetyltransferase immunohistochemical study. *Neurosci Lett* 1988; 95:19-23
  90. Steriade M, McCarley RW: Brain Control of Wakefulness and Sleep, 2nd edition. New York, Kluwer Academic/Plenum, 2005, pp 1-728
  91. Mesulam MM, Geula C, Bothwell MA, Hersh LB: Human reticular formation: Cholinergic neurons of the pedunculopontine and laterodorsal tegmental nuclei and some cytochemical comparisons to forebrain cholinergic neurons. *J Comp Neurol* 1989; 283:611-33
  92. Kobayashi T, Good C, Mamiya K, Skinner RD, Garcia-Rill E: Development of REM sleep drive and clinical implications. *J Appl Physiol* 2004; 96:735-46
  93. Lydic R, Baghdoyan HA: Pedunculopontine stimulation alters respiration and increases ACh release in the pontine reticular formation. *Am J Physiol* 1993; 264:R544-54
  94. Thakkar M, Portas C, McCarley RW: Chronic low-amplitude electrical stimulation of the laterodorsal tegmental nucleus of freely moving cats increases REM sleep. *Brain Res* 1996; 723:223-7
  95. Kodama T, Takahashi Y, Honda Y: Enhancement of acetylcholine release during paradoxical sleep in the dorsal tegmental field of the cat brain stem. *Neurosci Lett* 1990; 114:277-82
  96. Leonard TO, Lydic R: Nitric oxide synthase inhibition decreases pontine acetylcholine release. *Neuroreport* 1995; 6:1525-9
  97. Leonard TO, Lydic R: Pontine nitric oxide modulates acetylcholine release, rapid eye movement sleep generation, and respiratory rate. *J Neurosci* 1997; 17:774-85
  98. Lydic R, Baghdoyan HA, Lorinc Z: Microdialysis of cat pons reveals enhanced acetylcholine release during state-dependent respiratory depression. *Am J Physiol* 1991; 261:R766-70
  99. Baghdoyan HA, Mallios VJ, Duckrow RB, Mash DC: Localization of muscarinic receptor subtypes in brain stem areas regulating sleep. *Neuroreport* 1994; 5:1631-4
  100. Baghdoyan HA: Location and quantification of muscarinic receptor subtypes in rat pons: Implications for REM sleep generation. *Am J Physiol* 1997; 273:R896-904
  101. Caulfield MP, Birdsall NJM: International Union of Pharmacology: XVII. Classification of muscarinic acetylcholine receptors. *Pharmacol Rev* 1998; 50:279-90
  102. Felder CC, Bymaster FP, Ward J, DeLapp N: Therapeutic opportunities for muscarinic receptors in the central nervous system. *J Med Chem* 2000; 43:4333-53
  103. Baghdoyan HA, Lydic R: M2 muscarinic receptor subtype in the feline medial pontine reticular formation modulates the amount of rapid eye movement sleep. *Sleep* 1999; 22:835-47
  104. Baghdoyan HA, Flegal MA, Lydic R: M2 muscarinic autoreceptors regulate acetylcholine release in the pontine reticular formation. *J Pharmacol Exp Ther* 1998; 286:1446-52
  105. Coleman CG, Lydic R, Baghdoyan HA: ACh release in the pontine reticular formation of C57BL/6J mouse is modulated by non-M1 muscarinic receptors. *Neuroscience* 2004; 126:831-8
  106. Carty DJ: Pertussis toxin-catalyzed ADP-ribosylation of G proteins. *Methods Enzymol* 1994; 237:63-70
  107. Shuman SL, Capece ML, Baghdoyan HA, Lydic R: Pertussis toxin-sensitive G proteins mediate carbachol induced REM sleep and respiratory depression. *Am J Physiol* 1995; 269:R308-17
  108. Coleman CG, Lydic R, Baghdoyan HA: M2 muscarinic receptors in pontine reticular formation of C57BL/6J mouse contribute to REM sleep generation. *Neuroscience* 2004; 126:821-30

109. Capece ML, Lydic R: cAMP and protein kinase A modulate cholinergic rapid eye movement sleep generation. *Am J Physiol* 1997; 273:R1430-40
110. Marks GA, Birabil CG: Infusion of adenylyl cyclase inhibitor SQ22,536 into the medial pontine reticular formation of rats enhances rapid eye movement sleep. *Neuroscience* 2000; 98:311-5
111. Capece ML, Baghdoyan HA, Lydic R: Carbachol-stimulates [<sup>35</sup>S]guanylyl 5'-( $\gamma$ -thio)triphosphate binding in rapid eye movement sleep-related brain stem nuclei of rat. *J Neurosci* 1998; 18:3779-85
112. Hernandez-Peon R, Chavez-Ibarra G, Morgane PJ, Timo-Iaria C: Limbic cholinergic pathways involved in sleep and emotional behavior. *Exp Neurol* 1963; 8:93-111
113. George R, Haslett WL, Jenden DJ: A cholinergic mechanism in the brainstem reticular formation: Induction of paradoxical sleep. *Int J Neuropharmacol* 1964; 72:541-52
114. Baghdoyan HA, Monaco A, Rodrigo-Angulo M, Assens F, McCarley RW, Hobson JA: Microinjection of neostigmine into the pontine reticular formation of cats enhances desynchronized sleep signs. *J Pharmacol Exp Ther* 1984; 231:173-80
115. Baghdoyan HA, Rodrigo-Angulo ML, McCarley RW, Hobson JA: Site-specific enhancement and suppression of desynchronized sleep signs following cholinergic stimulation of three brain stem regions. *Brain Res* 1984; 306:39-52
116. Baghdoyan HA, Rodrigo-Angulo ML, McCarley RW, Hobson JA: A neuro-anatomical gradient in the pontine tegmentum for the cholinergic induction of desynchronized sleep signs. *Brain Res* 1987; 414:245-61
117. Lee IH, Friedman DB, Lydic R: Respiratory nuclei share synaptic connectivity with pontine reticular regions regulating REM sleep. *Am J Physiol* 1995; 268:L251-62
118. Capece ML, Efange SMN, Lydic R: Vesicular acetylcholine transport inhibitor suppresses REM sleep. *Neuroreport* 1997; 8:481-4
119. Domino EF, Yamamoto K, Dren AT: Role of cholinergic mechanisms in states of wakefulness and sleep. *Prog Brain Res* 1968; 28:113-33
120. Shiromani PJ, Fishbein W: Continuous pontine cholinergic microinfusion via mini-pump induces sustained alterations in rapid eye movement (REM) sleep. *Pharmacol Biochem Behav* 1986; 25:1253-61
121. Gnadt JW, Pegram V: Cholinergic brainstem mechanisms of REM sleep in the rat. *Brain Res* 1986; 384:29-41
122. Imeri L, Bianchi S, Angeli P, Mancina M: Selective blockade of different brain stem muscarinic receptor subtypes: Effects on the sleep-wake cycle. *Brain Res* 1994; 636:68-72
123. Bourgin P, Escourrou P, Gaultier C, Adrien J: Induction of rapid eye movement sleep by carbachol infusion into the pontine reticular formation. *Neuroreport* 1995; 6:532-6
124. Marks GA, Birabil CG: Enhancement of rapid eye movement sleep in the rat by cholinergic and adenosinergic agonists infused into the pontine reticular formation. *Neuroscience* 1998; 86:29-37
125. Kumar P, Raju TR: Seizure susceptibility decreases with enhancement of rapid eye movement sleep. *Brain Res* 2001; 922:299-304
126. Mavanji V, Datta S: Activation of the phasic pontine wave generator enhances improvement of learning performance: A mechanism for sleep dependent plasticity. *Eur J Neurosci* 2003; 17:359-70
127. Wetzell W, Wagner T, Balschun D: REM sleep enhancement induced by different procedures improves memory retention in rats. *Eur J Neurosci* 2003; 18:2611-7
128. Horner RL, Kubin L: Pontine carbachol elicits multiple rapid eye movement sleep-like neural events in urethane-anesthetized rats. *Neuroscience* 1999; 93:215-26
129. Xi MC, Liu RH, Yamuy J, Morales FR, Chase MH: Electrophysiological properties of lumbar motoneurons in the alpha chloralose anesthetized cat during carbachol-induced motor inhibition. *J Neurophysiol* 1997; 78:129-36
130. Lydic R, Douglas CL, Baghdoyan HA: Microinjection of neostigmine into the pontine reticular formation of C57BL/6J mouse enhances rapid eye movement sleep and depresses breathing. *Sleep* 2002; 25:835-41
131. Sagales T, Erill S, Domino EF: Differential effects of scopolamine and chlorpromazine on REM and NREM sleep in normal male subjects. *Clin Pharmacol Ther* 1969; 10:522-9
132. Sitaram N, Wyatt RJ, Dawson S, Gillin JC: REM sleep induction by physostigmine infusion during sleep. *Science* 1976; 191:1281-3
133. Sitaram N, Moore AM, Gillin JC: Experimental acceleration and slowing of REM sleep ultradian rhythm by cholinergic agonist and antagonist. *Nature* 1978; 274:490-2
134. Hedner J, Kraicz H, Peker Y, Murphy P: Reduction of sleep-disordered breathing after physostigmine. *Am J Respir Crit Care Med* 2003; 168:1246-51
135. Meuret P, Backman SB, Bonhomme V, Plourde G, Fiset P: Physostigmine reverses propofol-induced unconsciousness and attenuation of the auditory steady state response and Bispectral Index in human volunteers. *ANESTHESIOLOGY* 2000; 93:708-17
136. Mesulam MM: Cholinergic pathways and the ascending reticular activating system of the human brain. *Ann New York Acad Sci* 1995; 757:169-79
137. Nofziger EA, Mintun MA, Wiseman M, Kupfer DJ, Moore RY: Forebrain activation in REM sleep: An FDG PET study. *Brain Res* 1997; 770:192-201
138. Kinomura S, Larsson J, Gulyás B, Roland PE: Activation by attention of the human reticular formation and thalamic intralaminar nuclei. *Science* 1996; 271:512-5
139. Trevor AJ, Miller RD: General anesthetics, Basic and Clinical Pharmacology, 8th edition. Edited by Katsung BG. Norwalk, Connecticut, Appleton & Lange, 2001, pp 419-35
140. Phillipson EA: Control of breathing during sleep. *Am Rev Resp Dis* 1978; 118:909-39
141. Deegan PC, McNicholas WT: Pathophysiology of obstructive sleep apnoea. *Eur Resp J* 1995; 8:1161-78
142. Douglas NJ: Respiratory physiology: Control of ventilation, Principles and Practice of Sleep Medicine, 4th edition. Edited by Kryger MH, Roth T, Dement WC. Philadelphia, Elsevier Saunders, 2005, pp 224-31
143. Verrier RL, Lau TR, Walloppillai U, Quattrocchi J, Nearing BD, Moreno R, Hobson JA: Primary vagally mediated decelerations in heart rate during tonic rapid eye movement sleep in cats. *Am J Physiol* 1998; 274:R1136-41
144. Verrier RL, Muller JE, Hobson JA: Sleep, dreams, and sudden death: The case for sleep as an autonomic stress test for the heart. *Cardio Res* 1996; 31:181-211
145. Harper RM, Rector D, Poe G, Frysinger RC, Kristensen M, Gozal D: Rostral brain regions contributing to respiratory control. *Prog Brain Res* 1996; 107:145-56
146. Harper RM, Bandler R, Spriggs D, Alger JR: Lateralized and widespread brain activation during transient blood pressure elevation revealed by magnetic resonance imaging. *J Comp Neurol* 2000; 417:195-204
147. Harper RM, Macey PM, Henderson LA, Woo MA, Macey KE, Frysinger RC, Alger JR, Nguyen KP, Yan-Go FL: fMRI responses to cold pressor challenges in control and obstructive sleep apnea subjects. *J Appl Physiol* 2003; 94:1583-95
148. Lai YY, Siegel JM: Muscle atonia in REM sleep, REM Sleep. Edited by Mallick BN, Inoué S. London, Narosa, 1999, pp 69-90
149. Chase MH, Morales FR: Control of motoneurons during sleep, Principles and Practice of Sleep Medicine, 3rd edition. Edited by Kryger MH, Roth T, Dement WC. Philadelphia, WB Saunders, 2000, pp 155-68
150. Brandt JA, Churchill L, Rehman A, Ellis G, Memet S, Israel A, Krueger JM: Sleep deprivation increases the activation of nuclear factor kappa B in lateral hypothalamic cells. *Brain Res* 2004; 1004:91-97
151. Everson CA: Sustained sleep deprivation impairs host defense. *Am J Physiol* 1993; 265:R1148-54
152. Everson CA, Toth LA: Systemic bacterial invasion induced by sleep deprivation. *Am J Physiol* 2000; 278:R905-16
153. Opp MR, Toth LA: Neural-immune interactions in the regulation of sleep. *Front Biosci* 2003; 8:d768-79
154. Alam MN, McGinty D, Bashir T, Kumar S, Imeri L, Opp MR: Interleukin-1B modulates state-dependent discharge activity of preoptic area and basal forebrain neurons: Role in sleep regulation. *Eur J Neurosci* 2004; 20:207-16
155. Soja PJ, Cairns BE, Kristensen MP: Transmission through ascending trigeminal and lumbar sensory pathways: Dependency on behavioral state, Handbook of Behavioral State Control: Cellular and Molecular Mechanisms. Edited by Lydic R, Baghdoyan HA. Boca Raton, Florida, CRC, 1999, pp 521-44
156. Soja PJ, Pang W, Taepavaraprak N, McErlane SA: Spontaneous spike activity of spinoreticular tract neurons during sleep and wakefulness. *Sleep* 2001; 24:18-25
157. Taepavaraprak N, McErlane SA, Chang A, Chow S, Fabian L, Soja PJ: State-dependent GABAergic inhibition of sciatic nerve-evoked responses of dorsal spinocerebellar tract neurons. *J Neurophys* 2004; 92:1479-90
158. Hunter JM: New Neuromuscular Blocking Drugs. *N Engl J Med* 1995; 332:1691-9
159. Wiklund RA, Rosenbaum SH: Anesthesiology. I. *N Engl J Med* 1997; 337:1132-41
160. Dilger JP: Structure and function of the nicotinic acetylcholine receptor, Anesthesia: Biologic Foundations, Vol 2: Integrated Systems. Edited by Yaksh TL, Lynch C, Zapol WM, Maze M, Biebuyck JF, Saidman LJ. New York, Lippincott-Raven, 1998, pp 221-37
161. Jinks SL, Martin JT, Carstens E, Jung S-W, Antognini JF: Peri-MAC depression of a nociceptive withdrawal reflex is accompanied by reduced dorsal horn activity with halothane but not isoflurane. *ANESTHESIOLOGY* 2003; 98:1128-38
162. Eger EI, Zhang Y, Laster M, Flood P, Kendig JJ, Sonner JM: Acetylcholine receptors do not mediate the immobilization produced by inhaled anesthetics. *Anesth Analg* 2002; 94:1500-4
163. Zepelin H, Siegel JM, Tobler I: Mammalian sleep, Principles and Practice of Sleep Medicine, 4th edition. Edited by Kryger MH, Roth T, Dement WC. Philadelphia, Elsevier Saunders, 2005, 91-100
164. Dement WC: The occurrence of low voltage, fast, electroencephalogram patterns during behavioral sleep in the cat. *Electroenceph Clin Neurophys* 1958; 10:291-6
165. Jouvett M, Michel F: Correlations electromyographiques du sommeil chez le chat. *C R Soc Biol Paris* 1959; 153:422-5
166. Mahowald MW, Schenck CH: REM sleep parasomnias, Principles and Practice of Sleep Medicine, 4th edition. Edited by Kryger MH, Roth T, Dement WC. Philadelphia, Elsevier Saunders, 2005, 897-916
167. Magoun HW, Rhines R: An inhibitory mechanism in the bulbar reticular formation. *J Neurophysiol* 1946; 9:165-71
168. Pompeiano O: The neurophysiological mechanisms of the postural and motor events during desynchronized sleep, Sleep and Altered States of Consciousness. Edited by Kety SS, Evarts EV, Williams HL. Baltimore, Williams & Wilkins, 1967, pp 351-423



169. Lydic R, McCarley RW, Hobson JA: Serotonin neurons and sleep. I. Long term recordings of dorsal raphe discharge frequency and PGO waves. *Arch Ital Biol* 1987; 125:317-43
170. Lydic R, McCarley RW, Hobson JA: Serotonin neurons and sleep: II. Time course of dorsal raphe discharge, PGO waves, and behavioral states. *Arch Ital Biol* 1987; 126:1-28
171. Chase MH, Babb M: Masseteric reflex response to reticular stimulation reverses during active sleep compared with wakefulness or quiet sleep. *Brain Res* 1973; 59:421-6
172. Nakamura Y, Goldberg LJ, Chandler SH, Chase MH: Intracellular analysis of trigeminal motoneuron activity during sleep in the cat. *Science* 1978; 199: 204-7
173. Morales FR, Schadt J, Chase MH: Intracellular recording from spinal cord motoneurons in the chronic cat. *Physiol Behav* 1981; 27:355-62
174. Kendig JJ: Spinal cord: Anesthetic actions on motor neurons, *Neural Mechanisms of Anesthesia*. Edited by Antognini JF, Carstens EE, Raines DE. Totowa, New Jersey, Humana, 2003, pp 215-30
175. Baghdoyan HA: Cholinergic mechanisms regulating REM sleep, *Sleep Science: Integrating Basic Research and Clinical Practice. Monographs in Clinical Neuroscience*. Vol 15. Edited by Schwartz WJ. Basel, Karger, 1997, pp 88-116
176. Morales FR, Englehardt JK, Soja PA, Pereda AE: Motoneurons properties during motor inhibition produced by microinjection of carbachol into the pontine reticular formation of the decerebrate cat. *J Neurophysiol* 1987; 57:1118-29
177. Kodama T, Lai YY, Siegel JM: Changes in inhibitory amino acid release linked to pontine induced atonia: An in vivo microdialysis study. *J Neurosci* 2003; 23:1548-54
178. Reid MS, Siegel JM, Dement WC, Mignot E: Cholinergic mechanisms in canine narcolepsy: II. Acetylcholine release in the pontine reticular formation is enhanced during cataplexy. *Neuroscience* 1994; 59:523-30
179. Takakusaki K, Saitoh K, Harada H, Okumura T, Sakamoto T: Evidence for a role of basal ganglia in the regulation of rapid eye movement sleep by electrical and chemical stimulation of the pedunculopontine tegmental nucleus and the substantia nigra pars reticulata in decerebrate cats. *Neuroscience* 2004; 124: 207-20
180. Pose I, Sampogna S, Chase MH, Morales FR: Cuneiform neurons activated during cholinergically induced active sleep in the cat. *J Neurosci* 2000; 20: 3319-27
181. Radulovacki M, Pavlovic S, Carley DW: Pontine intertrigeminal region attenuates sleep apnea in rats. *Sleep* 2004; 27:383-7
182. Arias HR: Role of local anesthetics on both cholinergic and serotonergic ionotropic receptors. *Neurosci Biobehav Rev* 1999; 23:817-43
183. Antognini JF, Carstens E, Sudo M, Sudo S: Isoflurane depresses electroencephalographic and medial thalamic responses to noxious stimulation via an indirect spinal action. *Anesth Analg* 2000; 91:1282-88
184. Antognini JF, Wang XW, Carstens E: Isoflurane action in the spinal cord blunts electroencephalographic and thalamic-reticular formation responses to noxious stimulation in goats. *ANESTHESIOLOGY* 2000; 92:559-66
185. Dement WC, Kleitman N: Cyclic variations in EEG during sleep and their relation to eye movements, body motility and dreaming. *EEG Clin Neurophys* 1957; 9:673-90
186. Hanning CD, Aitkenhead AR: Sleep, depth of anaesthesia and awareness, *Anaesthesia*. Edited by Nimmo WS, Rowbotham DJ, Smith G. Oxford, Blackwell Scientific, 1994, pp 3-20
187. Mashour GA: Consciousness unbound. *ANESTHESIOLOGY* 2004; 100:428-33
188. Tassi P, Muzet A: Defining the states of consciousness. *Neurosci Biobehav Rev* 2001; 25:175-91
189. Hobson JA, Pace-Schott EF, Stickgold R: Dreaming and the brain: Toward a cognitive neuroscience of conscious states. *Behav Brain Sci* 2000; 23:793-842
190. Sebel PS, Bowdle TA, Ghoneim MM, Rampil JJ, Padilla RE, Gan TJ, Domino KB: The incidence of awareness during anesthesia: A multicenter United States study. *Anesth Analg* 2004; 99:833-9
191. Dement WC: The effect of dream deprivation. *Science* 1960; 131:1705-7
192. Pace-Schott EF: The neurobiology of dreaming, *Principles and Practice of Sleep Medicine*, 4th edition. Edited by Kryger MH, Roth T, Dement WC. Philadelphia, Elsevier Saunders, 2005, pp 551-64
193. Wagner BK, O'Hara DA, Hammond JS: Drugs for amnesia in the ICU. *Am J Crit Care* 1997; 6:192-201
194. Parthasarathy S, Tobin JR: Sleep in the intensive care unit. *Intensive Care Med* 2004; 30:197-206
195. Heffner JE: A wake-up call in the intensive care unit. *N Engl J Med* 2000; 342:1520-2
196. Ostermann ME, Keenan SP, Seiferling RA, Sibbald WJ: Sedation in the intensive care unit: A systematic review. *JAMA* 2000; 283:1451-9
197. Domino KB, Posner KL, Caplan RA, Cheney FW: Awareness during anesthesia: A closed claims analysis. *ANESTHESIOLOGY* 1999; 90:1053-61
198. Stone DJ, Bogdonoff DL, Leisure GS, Spiekermann BS, Mathes DD: Perioperative Care: Anesthesia, Medicine, and Surgery. St. Louis, Mosby, 1998, pp 455-6
199. Link J, Papadopoulos G, Dopjans G, Guggenmoos-Holzmann I, Eyrich K: Distinct central anticholinergic syndrome following general anesthesia. *Eur J Anaesth* 1997; 14:15-23
200. Krauss B, Green SM: Sedation and analgesia for procedures in children. *N Engl J Med* 2000; 342:938-45
201. CDC: Vital and Health Statistics, Ambulatory and Inpatient Procedures in the United States. Washington, D.C., U.S. Department of Health and Human Services, 1996
202. Ramsay MA, Savege TM, Simpson BR, Goodwin R: Controlled sedation with alphaxalone-alphadolone. *BMJ* 1974; 2:656-9
203. Fragen RJ, Avram MJ: Nonopioid intravenous anesthetics, *Clinical Anesthesia*, 2nd edition. Edited by Barash, PG, Cullen BF, Stoelting RK. Philadelphia, JB Lippincott, 1992, pp 385-412
204. Avramov MN, Smith I, White PF: Interactions between midazolam and remifentanyl during monitored anesthesia care. *ANESTHESIOLOGY* 1996; 85:1283-9
205. Holzman RS, Cullen DJ, Eichhorn JH, Phillips JH: Guidelines for sedation by nonanesthesiologists during diagnostic and therapeutic procedures. *J Clin Anesth* 1994; 6:265-75
206. Gross JB, Bailey PL, Caplan RA, Connis RT, Coté CJ, Davis FG, Epstein BS, Kapur PA, Zerwas JM, Zuccaro G: Practice guidelines for sedation and analgesia by non-anesthesiologists. *ANESTHESIOLOGY* 1996; 84:459-71
207. Malviya S, Naughton N, Tremper KK: Sedation and Analgesia for Diagnostic and Therapeutic Procedures. Totowa, New Jersey, Humana, 2003, pp 1-310
208. Mahowald MW, Schenck CH: Dissociated states of wakefulness and sleep. *Neurology* 1992; 42:44-52
209. Roelofs JA, Louw LR, Roelofs PG: A double blind randomized comparison of oral trimeprazine-methadone and ketamine-midazolam for sedation of pediatric dental patients for oral surgical procedures. *Anesth Prog* 1998; 45:3-11
210. Doyle WL, Perrin L: Emergence delirium in a child given oral midazolam for conscious sedation. *Ann Emerg Med* 1994; 24:1173-5
211. Moldofsky H: Sleep and pain. *Sleep Med Rev* 2001; 5:387-98
212. Roehrs T, Roth T: Sleep and pain: Interaction of two vital functions. *Semin Neurol* 2005; 25:106-16
213. Fujiki A, Shimizu A, Yamada Y, Yamamoto J, Kaneko Z: The Babinski reflex during sleep and wakefulness. *Electroencephalog Clin Neurophysiol* 1971; 31:610-3
214. Sandrini G, Milanov I, Rossi B, Murri L, Alfonsi E, Moglia A, Nappi G: Effects of sleep on spinal nociceptive reflexes in humans. *Sleep* 2001; 24:13-7
215. Lavigne G, Brousseau M, Kato T, Mayer P, Manzini C, Guitard F, Montplaisir J: Experimental pain perception remains equally active over all sleep stages. *Pain* 2004; 110:646-5
216. Lavigne G, Zucconi M, Castronovo C, Manzini C, Marchettini P, Smirne S: Sleep arousal response to experimental thermal stimulation during sleep in human subjects free of pain and sleep problems. *Pain* 2000; 84:283-90
217. Bonica JJ: General considerations of chronic pain, *The Management of Pain*, 2nd edition. Edited by Bonica JJ. Philadelphia, Lea & Febiger, 1990, pp 180-96
218. Rosenberg-Adamsen S, Kehlet H, Dodds C, Rosenberg J: Postoperative sleep disturbances: Mechanisms and clinical implications. *Br J Anaesth* 1996; 76:552-9
219. Yaksh TL, Dirksen R, Hartig GJ: Antinociceptive effects of intrathecally injected cholinomimetic drugs in the rat and cat. *Eur J Pharmacol* 1985; 117:81-8
220. Harvig P, Gillberg PG, Gordh T, Post C: Cholinergic mechanisms in pain and analgesia. *Trends Pharmacol Sci* 1989; 10 (suppl):75-9
221. Gillberg PG, Gordh T, Hartvig P, Jansson I, Pettersson J, Post C: Characterization of the antinociception induced by intrathecally administered carbachol. *Pharmacol Toxicol* 1989; 64:340-3
222. Hood DD, Eisenach JC, Tuttle R: Phase I safety assessment of intrathecal neostigmine methylsulfate in humans. *ANESTHESIOLOGY* 1995; 82:331-43
223. Lauretti GR, Hood DD, Eisenach JC, Pfeifer BL: A multicenter study of intrathecal neostigmine for analgesia following vaginal hysterectomy. *ANESTHESIOLOGY* 1998; 89:913-8
224. Omais M, Lauretti GR, Paccola CAJ: Epidural morphine and neostigmine for postoperative analgesia after orthopedic surgery. *Anesth Analg* 2002; 95: 1698-701
225. Yaksh TL: Pharmacology and mechanisms of opioid analgesic activity, *Anesthesia: Biologic Foundations*. Edited by Yaksh TL, Lynch C, Zapol WM, Maze M, Biebuyck JF, Saidman IJ. New York, Lippincott-Raven, 1998, pp 921-34
226. Cronin A, Keifer JC, Baghdoyan HA, Lydic R: Opioid inhibition of rapid eye movement sleep by a specific mu receptor agonist. *Br J Anaesth* 1995; 74:188-92
227. Keifer JC, Baghdoyan HA, Lydic R: Sleep disruption and increased apneas after pontine microinjection of morphine. *ANESTHESIOLOGY* 1992; 77:973-82
228. Lamberg L: Chronic pain linked with poor sleep: Exploration of causes and treatment. *JAMA* 1999; 281:691-2
229. Knill RL, Moote CA, Skinner MI, Rose EA: Anesthesia with abdominal surgery leads to intense REM sleep during the first postoperative week. *ANESTHESIOLOGY* 1990; 73:52-61
230. Rosenberg J: Sleep disturbances after non-cardiac surgery. *Sleep Med Rev* 2001; 5:129-37
231. Osman NI, Baghdoyan HA, Lydic R: Morphine inhibits acetylcholine release in rat prefrontal cortex when delivered systemically or by microdialysis to basal forebrain. *ANESTHESIOLOGY* 2005; 103:779-87
232. Lydic R, Keifer JC, Baghdoyan HA, Becker L: Microdialysis of the pontine reticular formation reveals inhibition of acetylcholine release by morphine. *ANESTHESIOLOGY* 1993; 79:1003-12
233. Mortazavi S, Thompson J, Baghdoyan HA, Lydic R: Fentanyl and mor-



phine, but not remifentanyl, inhibit acetylcholine release in pontine regions modulating arousal. *ANESTHESIOLOGY* 1999; 90:1070-7

234. Ishizawa Y, Ma H-C, Dohi S, Shimonaka H: Effects of cholinomimetic injection into the brain stem reticular formation on halothane anesthesia and antinociception in rats. *J Pharmacol Exp Ther* 2000; 293:845-51

235. Ma H-C, Dohi S, Wang Y-F, Ishizawa Y, Yanagitate F: The antinociceptive and sedative effects of carbachol and oxycodone administered into brainstem pontine reticular formation and spinal subarachnoid space in rats. *Anesth Analg* 2001; 92:1307-15

236. Robert C, Stinus L, Limoge A: Sleep impairments in rats implanted with morphine pellets. *Neuropsychobiology* 1999; 40:214-7

237. Harte SE, Hoot MR, Borszcz GS: Involvement of the intralaminar parafascicular nucleus in muscarinic-induced antinociception in rats. *Brain Res* 2004; 1019:152-61

238. Bernard R, Lydic R, Baghdoyan HA: Hypocretin-1 activates G proteins in arousal-related brainstem nuclei of rat. *Neuroreport* 2002; 13:447-50

239. Bernard R, Lydic R, Baghdoyan HA: Hypocretin-1 causes G protein activation and increases ACh release in rat pons. *Eur J Neurosci* 2003; 18:1775-85

240. Bingham S, Davey PT, Babbs AJ, Irving EA, Sammons MJ, Wyles M, Jeffrey P, Cutler L, Riba I, Johns A, Porter RA, Upton N, Hunter AJ, Parsons AA: Orexin-A, a hypothalamic peptide with analgesic properties. *Pain* 2001; 92:81-90

241. Mason P: Contributions of the medullary raphe and ventromedial reticular region to pain modulation and other homeostatic functions. *Annu Rev Neurosci* 2001; 24:737-7

242. Besson JM: The pharmacology of pain: Twenty-five years of hope, despair, and hope. *Proceedings of the 7th World Congress on Pain*. Edited by Gebhart GF, Hammond DL, Jensen TS, Seattle, IASP, 1994, pp 23-39

243. Young T, Palta M, Dempsey J, Skatrud J, Weber S, Badr S: The occurrence of sleep-disordered breathing among middle-aged adults. *N Engl J Med* 1993; 328:1230-5

244. Bennett FM, St. John WM: Anesthesia selectively reduces hypoglossal nerve activity by actions upon the brain stem. *Pflugers Arch* 1984; 401:421-3

245. Nishino T, Shirahata M, Yonezawa T, Honda Y: Comparison of changes in the hypoglossal and the phrenic nerve activity in response to increasing depth of anesthesia in cats. *ANESTHESIOLOGY* 1984; 60:19-24

246. Boushra NN: Anaesthetic management of patients with sleep apnoea syndrome. *Can J Anaesth* 1996; 43:599-616

247. Isono S, Tanaka A, Nishino T: Lateral position decreases collapsibility of the passive pharynx in patients with obstructive sleep apnea. *ANESTHESIOLOGY* 2002; 97:780-5

248. Siyam MA, Benhamou D: Difficult endotracheal intubation in patients with sleep apnea syndrome. *Anesth Analg* 2002; 95:1098-102

249. Berry RB, Kouchi KG, Der DE, Dickel MJ, Light RW: Sleep apnea impairs the arousal response to airway occlusion. *Chest* 1996; 109:1490-6

250. Persson HE, Svanborg E: Sleep deprivation worsens obstructive sleep apnea: Comparison between diurnal and nocturnal polysomnography. *Chest* 1996; 109:645-50

251. Manning HL, Schwartzstein RM: Pathophysiology of dyspnea. *N Engl J Med* 1995; 333:1547-53

252. Dodge R, Cline MG, Quan SF: The natural history of insomnia and its relationship to respiratory symptoms. *Arch Intern Med* 1995; 155:1797-800

253. Borgbjerg FM, Nielsen K, Franks J: Experimental pain stimulates respiration and attenuates morphine-induced respiratory depression: A controlled study in human volunteers. *Pain* 1996; 64:123-8

254. Young T, Evans L, Finn L, Palta M: Estimation of clinically diagnosed proportion of sleep apnea syndrome in middle-aged men and women. *Sleep* 1997; 20:705-6

255. Piccirillo JF, Duntley S, Schotland H: Obstructive sleep apnea. *JAMA* 2000; 284:1492-4

256. Young T, Skatrud J, Peppard PE: Risk factors for obstructive sleep apnea in adults. *JAMA* 2004; 291:2013-6

257. Rennotte M-T, Baele P, Aubert G, Rodenstein D: Nasal continuous positive airway pressure in the perioperative management of patients with obstructive sleep apnea submitted to surgery. *Chest* 1995; 107:367-74

258. Isono S, Kochi T, Ide T, Sugimori K, Mizuguchi T, Nishino T: Differential effects of vecuronium on diaphragm and geniohyoid muscle in anesthetized dogs. *Br J Anaesth* 1992; 68:239-43

259. Lavie P, Ben-Yosef R, Rubin AE: Prevalence of sleep apnea syndrome among patients with essential hypertension. *Am Heart J* 1984; 108:373-6

260. Lavie P, Yoffe N, Berger I, Peled R: The relationship between the severity of sleep apnea syndrome and 24-h blood pressure values in patients with obstructive sleep apnea. *Chest* 1993; 103:717-21

261. Peppard PE, Young T, Palta M, Skatrud J: Prospective study of the association between sleep-disordered breathing and hypertension. *N Engl J Med* 2000; 342:1378-84

262. Nieto FJ, Young T, Lind BK, Shahar E, Samet JM, Redline S, D'Agostino RB, Newman AB, Lebowitz MD, Pickering TG: Association of sleep-disordered breathing, sleep apnea, and hypertension in a large community-based study. *JAMA* 2000; 283:1829-36

263. Gami AS, Howard DE, Olson EJ, Somers VK: Day-night pattern of sudden death in obstructive sleep apnea. *N Engl J Med* 2005; 352:1206-14

264. Beebe DW, Gozal D: Obstructive sleep apnea and the prefrontal cortex:

Towards a comprehensive model linking nocturnal upper airway obstruction to daytime cognitive and behavioral deficits. *J Sleep Res* 2002; 109:449-56

265. DeMarco GJ, Baghdoyan HA, Lydic R: Carbachol in the pontine reticular formation of C57BL/6J mouse decreases acetylcholine release in prefrontal cortex. *Neuroscience* 2004; 123:17-29

266. Douglas CL, Baghdoyan HA, Lydic R: Postsynaptic muscarinic M1 receptors activate prefrontal cortical EEG of C57BL/6J mouse. *J Neurophysiol* 2002; 88:3003-9

267. Douglas CL, Baghdoyan HA, Lydic R: M2 muscarinic autoreceptors modulate acetylcholine release in prefrontal cortex of C57BL/6J mouse. *J Pharmacol Exp Ther* 2001; 299:960-6

268. Douglas CL, Baghdoyan HA, Lydic R: Prefrontal cortex acetylcholine release, EEG slow-waves, and spindles are modulated by M2 autoreceptors in C57BL/6J mouse. *J Neurophysiol* 2002; 87:2817-22

269. Marcus CL: Pathophysiology of childhood obstructive sleep apnea: Current concepts. *Resp Physiol* 2000; 119:143-54

270. Gottlieb DJ, Chase C, Vezina RM, Heeren TC, Corwin MJ, Auerbach SH, Weese-Mayer DE, Lesko SM: Sleep-disordered breathing symptoms are associated with poorer cognitive functions in 5-year-old children. *J Peds* 2004; 145:458-64

271. Brown KA, Morin I, Hickey C, Manoukian JJ, Nixon GM, Brouillette RT: Urgent adenotonsillectomy. *ANESTHESIOLOGY* 2003; 99:586-95

272. Moss IR, Laferriere A: Central neuropeptide systems and respiratory control during development. *Resp Physiol Neurobiol* 2002; 131:15-27

273. Tankersley CG: Genetic control of ventilation: What are we learning from murine models? *Curr Opin Pulm Med* 1999; 5:344-8

274. Friedman L, Haines A, Klann K, Gallagher L, Saliba L, Han F, Strohl KP: Ventilatory behavior during sleep among A/J and C57BL/6J mouse strains. *J Appl Physiol* 2004; 97:1787-95

275. Mendelson WB: Hypnotic medications: Mechanisms of action and pharmacologic effects, Principles and Practice of Sleep Medicine. 4th edition. Edited by Kryger MH, Roth T, Dement WC. Philadelphia, Elsevier Saunders, 2005, pp 444-51

276. Lydic R, Baghdoyan HA: Neurochemical evidence for the cholinergic modulation of sleep and breathing, *Sleep Related Breathing Disorders: Experimental Models and Therapeutic Potential*. Edited by Carley D, Radulovacki M. New York, Marcel Dekker, 2003, pp 57-91

277. Lydic R, Baghdoyan HA: Cholinoceptive pontine reticular mechanisms cause state-dependent respiratory changes in the cat. *Neurosci Lett* 1989; 102:211-6

278. Lydic R, Baghdoyan HA, Zwillich CW: State-dependent hypotonia in posterior cricoarytenoid muscles of the larynx caused by cholinoceptive reticular mechanisms. *FASEB J* 1989; 3:1625-31

279. Bianchi AL, Denavit-Saubie M, Champagnat J: Central control of breathing in mammals: Neuronal circuitry, membrane properties, and neurotransmitters. *Physiol Rev* 1995; 75:1-45

280. Kubin L: Carbachol models of REM sleep: Recent developments and new directions. *Arch Ital Biol* 2001; 139:147-68

281. Kuna ST, Smickley JS, Insalaco G: Posterior cricoarytenoid muscle activity during wakefulness and sleep in normal adults. *J Appl Physiol* 1990; 68:1746-54

282. Hornbein TF: Anesthesia and ventilatory control, *Effects of Anesthesia*. Edited by Covino BG, Fozzard HA, Rehder K, Strichartz G. Bethesda, American Physiological Society, 1985, pp 75-90

283. Nattie EE: CO<sub>2</sub>, brainstem chemoreceptors and breathing. *Prog Neurobiol* 1999; 59:299-331

284. Nattie EE: Central chemosensitivity, sleep, and wakefulness. *Resp Physiol* 2001; 129:257-68

285. Gilman S, Chervin RD, Koeppe RA, Consens FB, Little R, An H, Junck L, Heumann M: Obstructive sleep apnea is related to a thalamic cholinergic deficit in MSA. *Neurology* 2003; 61:35-9

286. Gan TJ: Postoperative nausea and vomiting: Can it be eliminated? *JAMA* 2002; 287:1233-6

287. Bailey PL, Rhondeau S, Schafer PG, Lu JK, Timmins BS, Foster W, Pace NL, Stanley TH: Dose-response pharmacology of intrathecal morphine in human volunteers. *ANESTHESIOLOGY* 1993; 79:49-59

288. Bailey PL, Lu JK, Pace NL, Orr JA, White JL, Hamber EA, Slawson MH, Crouch DJ, Rollins DE: Effects of intrathecal morphine on the ventilatory response to hypoxia. *N Engl J Med* 2000; 343:1228-34

289. Lydic R, Baghdoyan HA, McGinley J: Opioids, sedation, and sleep: Different states, similar traits, and the search for common mechanisms. *Sedation and Analgesia for Diagnostic and Therapeutic Procedures*. Edited by Malviya S, Naughton N, Tremper KK. Totowa, New Jersey, Humana, 2003, pp 1-32

290. Sauerland EK, Harper RM: The human tongue during sleep: Electromyographic activity of the genioglossus muscle. *Exp Neurol* 1976; 51:160-70

291. Remmers JE, DeGroot WJ, Sauerland EK, Anch M: Pathogenesis of upper airway occlusion during sleep. *J Appl Physiol* 1978; 44:931-8

292. Peever JH, Mateika JH, Duffin J: Respiratory control of hypoglossal motoneurons in the rat. *Pflugers Arch Eur J Physiol* 2001; 442:78-86

293. Morrison JL, Sood S, Liu H, Park E, Liu X, Nolan P, Horner RL: Role of inhibitory amino acids in control of hypoglossal motor outflow to genioglossus muscle in naturally sleeping rats. *J Physiol* 2003; 552(pt 3):975-91

294. Kubin L, Tojima H, Davies RO, Pack AI: Serotonergic excitatory drive to hypoglossal motoneurons in the decerebrate cat. *Neurosci Lett* 1992; 139:243-8

295. Kubin L, Reignier C, Tojima H, Taguchi O, Pack AI, Davies RO: Changes

in serotonin level in the hypoglossal nucleus region during carbachol-induced atonia. *Brain Res* 1994; 645:291-302

296. Yamuy J, Fung SJ, Xi M, Morales FR, Chase MH: Hypoglossal motoneurons are postsynaptically inhibited during carbachol-induced rapid eye movement sleep. *Neuroscience* 1999; 94:11-5

297. Fung SJ, Yamuy J, Xi M, Englehardt JK, Morales FR, Chase MH: Changes in electrophysiological properties of cat hypoglossal motoneurons during carbachol-induced motor inhibition. *Brain Res* 2000; 885:262-72

298. Woch G, Ogawa H, Davies RO, Kubin L: Behavior of hypoglossal inspiratory premotor neurons during the carbachol-induced REM sleep-like suppression of upper airway motoneurons. *Exp Brain Res* 2000; 130:508-20

299. Cassell MD, Yi H, Talman WT: Glycine receptor (Gephyrin) immunoreactivity is present on cholinergic neurons in the dorsal vagal complex. *Neuroscience* 2000; 95:489-97

300. Chamberlin NL, Bocchiaro CM, Greene RW, Feldman JL: Nicotine excitation of rat hypoglossal motoneurons. *Neuroscience* 2002; 115:861-70

301. Pose I, Fung SJ, Sampogna S, Chase MH, Morales FR: Nitrgergic innervation of trigeminal and hypoglossal motoneurons in the cat. *Brain Res* 2005; 1041:29-37

302. Jeleu A, Sood S, Liu H, Nolan P, Horner RL: Microdialysis perfusion of 5-HT into hypoglossal motor nucleus differentially modulates genioglossus activity across natural sleep-wake states in rats. *J Physiol* 2001; 532(pt 2):467-81

303. Xi MC, Fung SJ, Yamuy J, Morales FR, Chase MH: Hypocretinergic facilitation of synaptic activity of neurons in the nucleus pontis oralis of the cat. *Brain Res* 2003; 976:253-8

304. Nieuwenhuijs D, Sarton E, Teppema L, Dahan A: Propofol for monitored anesthesia care: Implications on hypoxic control of cardiorespiratory responses. *ANESTHESIOLOGY* 2000; 92:46-54

305. Xi MC, Morales FR, Chase MH: Interactions between GABAergic and cholinergic processes in the nucleus pontis oralis: Neuronal mechanisms controlling active (rapid eye movement) sleep and wakefulness. *J Neurosci* 2004; 24:10670-8

306. Sunderram J, Parisi RA, Strobel RJ: Serotonergic stimulation of the genioglossus and the response to nasal continuous positive airway pressure. *Am J Respir Crit Care Med* 2000; 162:925-9

307. Brown RE, Sergeeva O, Eriksson KS, Haas HL: Orexin A excites serotonergic neurons in the dorsal raphe nucleus of the rat. *Neuropharmacology* 2001; 40:457-9

308. Nattie EE, Shi J, Li A: Bicuculline dialysis in the retrolaryngeal nucleus (RTN) region stimulates breathing in the awake rat. *Resp Physiol* 2001; 124:179-93

309. Morrison JL, Sood S, Liu H, Park E, Nolan P, Horner RL: GABA<sub>A</sub> receptor antagonism at the hypoglossal motor nucleus increases genioglossus muscle activity in NREM but not REM sleep. *J Physiol* 2003; 548:569-83

310. Krnjevic K: Chemical transmission and cortical arousal. *ANESTHESIOLOGY* 1967; 28:100-5

311. Lambert DG, Appadu BL: Muscarinic receptor subtypes: Do they have a place in clinical anaesthesia? *Br J Anaesth* 1995; 74:497-9

312. Durieux ME: Muscarinic signaling in the central nervous system: Recent developments and anesthetic implications. *ANESTHESIOLOGY* 1996; 84:173-89

313. Perry E, Walker M, Grace J, Perry R: Acetylcholine in mind: A neurotransmitter correlate of consciousness? *Trends Neurosci* 1999; 22:273-80

314. Celesia GG, Jasper HH: Acetylcholine released from cerebral cortex in relation to state of activation. *Neurology* 1966; 16:1053-63

315. Jasper HH, Tessler J: Acetylcholine liberation from cerebral cortex during paradoxical (REM) sleep. *Science* 1971; 172:601-2

316. Marrosu F, Portas C, Mascia MS, Casu MA, Fa M, Giagheddu M, Imperato A, Gessa GL: Microdialysis measurement of cortical and hippocampal acetylcholine release during sleep-wake cycle in freely moving cats. *Brain Res* 1995; 671:329-32

317. Lydic R, Baghdoyan HA: Ketamine and MK-801 decrease ACh release in the pontine reticular formation, slow breathing, and disrupt sleep. *Sleep* 2002; 25:617-22

318. Naruo H, Onizuka S, Prince D, Takasaki M, Syed NI: Sevoflurane blocks cholinergic synaptic transmission postsynaptically but does not affect short-term potentiation. *ANESTHESIOLOGY* 2005; 102:920-8

319. Kikuchi T, Wang Y, Sato K, Okumura F: In vivo effects of propofol on acetylcholine release from frontal cortex, hippocampus and striatum studied by intracerebral microdialysis in freely moving rats. *Br J Anaesth* 1998; 80:644-8

320. Longo VG, Silvestrini B: Action of eserine and amphetamine on the electrical activity of the rabbit brain. *J Pharmacol Exp Ther* 1957; 120:160-70

321. Steriade M: Awakening the brain. *Nature* 1996; 383:24-5

322. Dringenberg HC, Olmstead MC: Integrated contributions of basal forebrain and thalamus to neocortical activation elicited by pedunculopontine tegmental stimulation in urethane-anesthetized rats. *Neuroscience* 2003; 119:839-53

323. Steriade M, Timofeev I: Neuronal plasticity in thalamocortical networks during sleep and waking oscillations. *Neuron* 2003; 37:563-76

324. Steriade M, Contreras D, Curro' Dossi R, Nunez A: The slow (<1 Hz) oscillation in reticular thalamic and thalamocortical neurons: Scenario of sleep rhythm generation in interacting thalamic and neocortical networks. *J Neurosci* 1993; 13:3284-99

325. Steriade M: Cholinergic blockage of network- and intrinsically generated

slow oscillations promotes waking and REM sleep activity patterns in thalamic and cortical neurons. *Prog Brain Res* 1993; 98:345-55

326. Alkire MT, Pomfret CJ, Haier RJ, Gianzero MV, Chan CM, Jacobsen BP, Fallon JH: Functional brain imaging during anesthesia in humans: Effects of halothane on global and regional cerebral glucose metabolism. *ANESTHESIOLOGY* 1999; 90:701-9

327. Sarter M, Bruno JP: Cortical cholinergic inputs mediating arousal, attentional processing and dreaming: Differential afferent regulation of the basal forebrain by telencephalic and brainstem afferents. *Neuroscience* 2000; 95:933-52

328. Douglas CL, DeMarco GJ, Baghdoyan HA, Lydic R: Pontine and basal forebrain cholinergic interaction: Implications for sleep and breathing. *Resp Physiol Neurobiol* 2004; 143:251-62

329. Vazquez J, Baghdoyan HA: Basal forebrain acetylcholine release during REM sleep is significantly greater than during waking. *Am J Physiol* 2001; 280:R598-601

330. Vazquez J, Lydic R, Baghdoyan HA: The nitric oxide synthase inhibitor N<sup>G</sup>-nitro-L-arginine increases basal forebrain acetylcholine release during sleep and wakefulness. *J Neurosci* 2002; 22:5597-605

331. Levey AI: Muscarinic acetylcholine receptor expression in memory circuits: Implications for treatment of Alzheimer disease. *Proc Natl Acad Sci U S A* 1996; 93:13541-6

332. Timofeev I, Grenier F, Steriade M: Disfacilitation and active inhibition in the neocortex during the natural sleep-wake cycle: An intracellular study. *Proc Natl Acad Sci U S A* 2001; 98:1924-9

333. Groenewegen H, Uylings H: The prefrontal cortex and the integration of sensory, limbic and autonomic information. *Prog Brain Res* 2000; 126:3-28

334. Drummond SPA, Brown GG, Stricker JL, Buxton RB, Wong EC, Gillin JC: Sleep deprivation-induced reduction in cortical functional response to serial subtraction. *Neuroreport* 1999; 10:3745-8

335. Harrison Y, Horne JA: Sleep deprivation affects speech. *Sleep* 1997; 20:871-7

336. Horne JA: Human sleep, sleep loss and behaviour: Implications for the prefrontal cortex and psychiatric disorder. *Br J Psych* 1993; 162:413-9

337. Andrade J: Investigations of hypesthesia: Using anesthetics to explore relationships between consciousness, learning, and memory. *Conscious Cogn* 1996; 5:562-80

338. Casele-Rondi G: Perceptual processing during general anaesthesia reconsidered within a neuro-psychological framework. *Memory and Awareness in Anaesthesia III*. Edited by Bonke B, Bovill J, Moerman N. Assen, Van Gorcum, 1996, pp 102-7

339. Porkka-Heiskanen T, Strecker RE, Thakkar M, Bjorkum AA, Greene RW, McCarley RW: Adenosine: A mediator of the sleep-inducing effects of prolonged wakefulness. *Science* 1997; 276:1265-8

340. Strecker RE, Morairty S, Thakkar M, Porkka-Heiskanen T, Basheer R, Dauphin IJ, Rainnie DG, Portas CM, Greene RW, McCarley RW: Adenosinergic modulation of basal forebrain and preoptic/anterior hypothalamic neuronal activity in the control of behavioral state. *Behav Brain Res* 2000; 115:183-204

341. Portas CM, Thakkar M, Rainnie DG, Greene RW, McCarley RW: Role of adenosine in behavioral state modulation: A microdialysis study in the freely moving cat. *Neuroscience* 1997; 79:225-35

342. Radulovacki M: Role of adenosine in sleep in rats. *Rev Clin Basic Pharm* 1985; 5:327-39

343. Benington JH, Heller HC: Restoration of brain energy metabolism as the function of sleep. *Prog Neurobiol* 1995; 45:347-60

344. Kalinchuk AV, Urrila A, Alanko L, Heiskanen S, Wigren H-K, Suomela M, Stenberg D, Porkka-Heiskanen T: Local energy depletion in the basal forebrain increases sleep. *Eur J Neurosci* 2003; 17:863-9

345. Landolt HP, Dijk DJ, Gaus SE, Borbely AA: Caffeine reduces low-frequency delta activity in the human sleep EEG. *Neuropsychopharmacology* 1995; 12:229-38

346. Dunwiddie TV, Masino SA: The role and regulation of adenosine in the central nervous system. *Annu Rev Neurosci* 2001; 24:31-55

347. Kaputlu I, Sadan G, Ozdem S: Exogenous adenosine potentiates hypnosis induced by intravenous anaesthetics. *Anaesthesia* 1998; 53:496-500

348. Arrigoni E, Rainnie DG, McCarley RW, Greene RW: Adenosine-mediated presynaptic modulation of glutamatergic transmission in the laterodorsal tegmentum. *J Neurosci* 2001; 21:1076-85

349. Rainnie DG, Grunze HC, McCarley RW, Greene RW: Adenosine inhibition of mesopontine cholinergic neurons: Implications for EEG arousal. *Science* 1994; 263:689-92

350. Tas PWL, Eisemann C, Roewer N: The volatile anesthetic isoflurane suppresses spontaneous calcium oscillations in vitro in rat hippocampal neurons by activation of adenosine A1 receptors. *Neurosci Lett* 2003; 338:229-32

351. Chagoya de Sanchez V, Hernandez Munoz R, Suarez J, Vidrio S, Yanez L, Diaz Munoz M: Day-night variations of adenosine and its metabolizing enzymes in the brain cortex of the rat: Possible physiological significance for the energetic homeostasis and the sleep-wake cycle. *Brain Res* 1993; 612:115-21

352. Ribeiro JA, Sebastiao AM, de Mendonca A: Adenosine receptors in the nervous system: Pathophysiological implications. *Prog Neurobiol* 2002; 68:377-92

353. Segerdahl M, Irestedt L, Sollevi A: Antinociceptive effect of perioperative



adenosine infusion in abdominal hysterectomy. *Acta Anaesthesiol Scand* 1997; 41:473-9

354. Sjolund KF, Belfrage M, Karlsten R, Segerdahl M, Arner S, Gordh T, Solevi A: Systemic adenosine infusion reduces the area of tactile allodynia in neuropathic pain following peripheral nerve injury: A multi-centre, placebo-controlled study. *Eur J Pain* 2001; 5:199-207

355. Eisenach JC, Hood D, Curry R: Phase I safety assessment of intrathecal injection of an American formulation of adenosine in humans. *ANESTHESIOLOGY* 2002; 96:24-8

356. Eisenach JC, Hood D, Curry R: Preliminary efficacy assessment of intrathecal injection of an American formulation of adenosine in humans. *ANESTHESIOLOGY* 2002; 96:29-34

357. Segerdahl M, Ekblom A, Sandelin K, Wickman M, Sollevi A: Perioperative adenosine infusion reduces the requirement for isoflurane and postoperative analgesics. *Anesth Analg* 1995; 80:1145-9

358. Zarate E, SaRego M, White PF, Duffy L, Shearer VE, Griffin JD, Whitten CW: Comparison of adenosine and remifentanyl infusions as adjuvants to desflurane anesthesia. *ANESTHESIOLOGY* 1999; 90:956-63

359. Ramos-Zepeda G, Schroder W, Rosenow S, Herrero JF: Spinal vs. supraspinal antinociceptive activity of the adenosine A1 receptor agonist cyclopentyl-adenosine in rats with inflammation. *Eur J Pharmacol* 2004; 499:247-56

360. Tanase D, Martin WA, Baghdoyan HA, Lydic R: G protein activation in rat ponto-mesencephalic nuclei is enhanced by combined treatment with a mu opioid and an adenosine A<sub>1</sub> receptor agonist. *Sleep* 2001; 24:52-62

361. Pearce RA: General anesthetic effects on GABA<sub>A</sub> receptors, *Neural Mechanisms of Anesthesia*. Edited by Antognini JF, Carstens EE, Raines DE. Totowa, New Jersey, Humana, 2003, pp 265-82

362. Westphalen RI, Hemmings HC: Effects of isoflurane and propofol on glutamate and GABA transporters in isolated cortical nerve terminals. *ANESTHESIOLOGY* 2003; 98:364-72

363. Westphalen RI, Hemmings HC: Selective depression by general anesthetics of glutamate versus GABA release from isolated cortical nerve terminals. *J Pharmacol Exp Ther* 2003; 304:1188-96

364. Bormann J: The "ABC" of GABA receptors. *Trends Pharmacol Sci* 2000; 21:16-9

365. Yang J, Isenberg KE, Zorumski CF: Volatile anesthetics gate a chloride current in postnatal rat hippocampal neurons. *FASEB J* 1992; 6:914-8

366. Jevtovic-Todorovic V, Hartman RE, Izumi Y, Benshoff ND, Dikranian K, Zorumski CF, Olney JW, Wozniak DF: Early exposure to common anesthetic agents causes widespread neurodegeneration in the developing rat brain and persistent learning deficits. *J Neurosci* 2003; 23:876-82

367. Ma J, Shen B, Stewart LS, Herrick IA, Leung LS: The septohippocampal system participates in general anesthesia (rapid communication). *J Neurosci* 2002; 22:RC200 1 of 6

368. Bieda MC, MacIver MB: Major role for tonic GABA<sub>A</sub> conductances in anesthetic suppression of intrinsic neuronal excitability. *J Neurophysiol* 2004; 92:1658-67

369. Lee RS, Steffensen SC, Henriksen SJ: Discharge profiles of ventral tegmental area GABA neurons during movement, anesthesia, and the sleep-wake cycle. *J Neurosci* 2001; 21:1757-66

370. Mallick BN, Kaur S, Saxena RN: Interactions between cholinergic and GABAergic neurotransmitters in and around the locus coeruleus for the induction and maintenance of rapid eye movement sleep in rats. *Neuroscience* 2001; 104:467-85

371. Vazquez J, Baghdoyan HA: Muscarinic and GABA<sub>A</sub> receptors modulate acetylcholine release in feline basal forebrain. *Eur J Neurosci* 2003; 17:249-59

372. Manfredi A, Brambilla D, Mancia M: Sleep is differentially modulated by basal forebrain GABA<sub>A</sub> and GABA<sub>B</sub> receptors. *Am J Physiol* 2001; 281:R170-5

373. Tung A, Bluhm B, Mendelson WB: The hypnotic effect of propofol in the medial preoptic area of the rat. *Life Sci* 2001; 69:855-62

374. Tung A, Bluhm B, Mendelson WB: Sleep inducing effects of propofol microinjection into the medial preoptic area are blocked by flumazenil. *Brain Res* 2001; 908:155-60

375. Mendelson WB: Sleep-inducing effects of adenosine microinjections into the medial preoptic area are blocked by flumazenil. *Brain Res* 2000; 852:479-81

376. Imeri L, Bianchi S, Angeli P, Mancia M: Stimulation of cholinergic receptors in the medial preoptic area affects sleep and cortical temperature. *Am J Physiol* 1995; 269:R294-9

377. Pain L, Jeltsch H, Lehmann O, Lazarus C, Laalou FZ, Cassel JC: Central cholinergic depletion induced by 192 IgG-Saporin alleviates the sedative effects of propofol in rats. *Br J Anaesth* 2000; 85:869-73

378. Lancel M: Role of GABA<sub>A</sub> receptors in the regulation of sleep: Initial sleep responses to peripherally administered modulators and agonists. *Sleep* 1999; 22:33-42

379. Ulorio J, Mavanji V, Saha S, Siwek DF, Datta S: Spontaneous REM sleep is modulated by the activation of the pedunculopontine tegmental GABA<sub>B</sub> receptors in the freely moving rat. *J Neurophysiol* 2004; 91:1822-31

380. Xi MC, Morales FR, Chase MH: Evidence that wakefulness and REM sleep are controlled by a GABAergic pontine mechanism. *J Neurophysiol* 1999; 82:2015-9

381. Xi MC, Morales FR, Chase MH: Induction of wakefulness and inhibition of active (REM) sleep by GABAergic processes in the nucleus pontis oralis. *Arch Ital Biol* 2001; 139:125-45

382. Vazquez J, Baghdoyan HA: GABA<sub>A</sub> receptors inhibit acetylcholine release in cat pontine reticular formation: Implications for REM sleep regulation. *J Neurophysiol* 2004; 92:2198-06

383. Kim H-S, Wan X, Mathers DA, Puil E: Selective GABA-receptor actions of amobarbital on thalamic neurons. *Br J Pharm* 2004; 143:485-94

384. Pace-Schott EF, Hobson JA: The neurobiology of sleep: Genetics, cellular physiology and subcortical networks. *Nat Rev Neurosci* 2002; 3:591-605

385. Berridge CW, Waterhouse BD: The locus coeruleus-noradrenergic system: Modulation of behavioral state and state-dependent cognitive processes. *Brain Res Rev* 2003; 42:33-84

386. Boutrel B, Franc B, Hen R, Hamon M, Adrien J: Key role of 5-HT<sub>1B</sub> receptors in the regulation of paradoxical sleep as evidenced in 5-HT<sub>1B</sub> knock-out mice. *J Neurosci* 1999; 19:3204-12

387. Boutrel B, Monaca C, Hen R, Hamon M, Adrien J: Involvement of 5-HT<sub>1A</sub> receptors in homeostatic and stress-induced adaptive regulations of paradoxical sleep: Studies in 5-HT<sub>1A</sub> knock-out mice. *J Neurosci* 2002; 22:4686-92

388. Wisor JP, Wurts SW, Hall FS, Lesch KP, Murphy DL, Uhl GR, Edgar DM: Altered rapid eye movement sleep timing in serotonin transporter knockout mice. *Neuroreport* 2003; 14:233-8

389. Jacobs BL, Fornal CA: An integrative role for serotonin in the central nervous system, *Handbook of Behavioral State Control: Cellular and Molecular Mechanisms*. Edited by Lydic R, Baghdoyan HA. Boca Raton, Florida, CRC, 1999, pp 181-93

390. Imeri L, Mancia M, Opp MR: Blockade of 5-hydroxytryptamine (serotonin)-2 receptors alters interleukin-1-induced changes in rat sleep. *Neuroscience* 1999; 92:745-9

391. Manzke T, Guenther U, Ponimaskin EG, Haller M, Dutschmann M, Schwarzscher S, Richter DW: 5-HT<sub>4(a)</sub> receptors avert opioid-induced breathing depression without loss of analgesia. *Science* 2003; 301:226-9

392. Shouse MN, Staba RJ, Saquib SF, Farber PR: Monoamines and sleep: Microdialysis findings in pons and amygdala. *Brain Res* 2000; 860:181-9

393. Hieble JP, Ruffolo RR: Adrenergic receptors, Understanding G protein-coupled receptors and their role in the CNS. Edited by Pangalos MN, Davies CH. Oxford, Oxford University Press, 2002, pp 205-20

394. Correa-Sales C, Rabin BC, Maze M: A hypnotic response to dexmedetomidine, an  $\alpha_2$  agonist, is mediated in the locus coeruleus in rats. *ANESTHESIOLOGY* 1992; 76:948-52

395. Maze M, Tranquilli W:  $\alpha_2$ -Adrenoreceptor agonists: Defining the role in clinical anesthesia. *ANESTHESIOLOGY* 1991; 74:581-605

396. Nicoll RA, Madison DV: General anesthetics hyperpolarize neurons in the vertebrate central nervous system. *Science* 1982; 217:1055-7

397. Hirota K, Kushikata T: Central noradrenergic neurones and the mechanism of general anesthesia. *Br J Anaesth* 2001; 87:811-3

398. Gaus SE, Strecker RE, Tate BA, Parker RA, Saper CB: Ventrolateral pre-optic nucleus contains sleep-active, galaninergic neurons in multiple mammalian species. *Neuroscience* 2002; 115:285-94

399. Pudovkina OL, Cremers TIFH, Westerink BHC: Regulation of the release of serotonin in the dorsal raphe nucleus by  $\alpha$ -1 and  $\alpha$ -2 adrenoceptors. *Synapse* 2003; 50:77-82

400. Ouyang M, Hellman K, Abel T, Thomas SA: Adrenergic signaling plays a critical role in the maintenance of waking and in the regulation of REM sleep. *J Neurophysiol* 2004; 92:2071-82

401. Lin J-S: Brain structures and mechanisms involved in the control of cortical activation and wakefulness, with emphasis on the posterior hypothalamus and histaminergic neurons. *Sleep Med Rev* 2000; 4:471-503

402. Steininger TL, Alam MN, Gong H, Szymusiak R, McGinty D: Sleep-waking discharge of neurons in the posterior lateral hypothalamus of the albino rat. *Brain Res* 1999; 840:138-47

403. Vanni-Mercier G, Sakai K, Jouviet M: Neurones spécifiques de l'éveil dans l'hypothalamus postérieur du chat. *C R Acad Sc Paris III* 1984; 298:195-200

404. Lin J-S, Hou Y, Sakai K, Jouviet M: Histaminergic descending inputs to the mesopontine tegmentum and their role in the control of cortical activation and wakefulness in the cat. *J Neurosci* 1996; 16:1523-37

405. Parmentier R, Ohtsu H, Djebbara-Hannas Z, Valatx J-L, Watanabe T, Lin J-S: Anatomical, physiological, and pharmacological characteristics of histidine decarboxylase knock-out mice: Evidence for the role of brain histamine in behavioral and sleep-wake control. *J Neurosci* 2002; 22:7695-711

406. Berry CB, Crome IB, Plant M, Plant M: Substance misuse amongst anaesthetists in the United Kingdom and Ireland: The results of a study commissioned by the Association of Anaesthetists of Great Britain and Ireland. *Anaesthesia* 2000; 55:946-52

407. Alexander BH, Checkoway H, Nagahama SI, Domino KB: Cause-specific mortality risks of anesthesiologists. *ANESTHESIOLOGY* 2000; 93:922-30

408. Booth JV, Grossman D, Moore J, Lineberger C, Reynolds JD, Reves JG, Sheffield D: Substance abuse among physicians: A survey of academic anesthesiology programs. *Anesth Analg* 2002; 95:1024-30

409. Koob GF, Le Moal M: Drug addiction, dysregulation of reward, and allostasis. *Neuropsychopharmacology* 2001; 24:97-129

410. Cami J, Farré M: Drug addiction. *N Engl J Med* 2003; 349:975-86

411. Kosten TR, O'Connor PG: Management of drug and alcohol withdrawal. *N Engl J Med* 2003; 348:1786-95

412. Nicholson AN, Pascoe PA: Dopaminergic transmission and the sleep-wakefulness continuum in man. *Neuropharmacology* 1990; 29:411-7



413. Kuhar MJ, Couceyro PR, Lambert PD: Catecholamines, Basic Neurochemistry, 6th edition. Edited by Siegel GJ, Agranoff BW, Albers RW, Fisher SK, Uhler MD. Philadelphia, Lippincott-Raven, 1999, pp 243-61
414. Monti JM, Fernandez M, Jantos H: Sleep during acute dopamine D1 agonist SKF 38393 or D1 antagonist SCH 23390 administration in rats. *Neuropsychopharmacology* 1990; 3:153-62
415. Issac SO, Berridge CW: Wake-promoting actions of dopamine D1 and D2 receptor stimulation. *J Pharmacol Exp Ther* 2003; 307:386-94
416. Garcia-Borreguero D, Larrosa O, Bravo M: Parkinson's disease and sleep. *Sleep Med Rev* 2003; 7:115-29
417. Chesson AL, Wise M, Davila D, Johnson S, Littner M, Anderson WM, Hartse K, Rafecas J: Practice parameters for the treatment of restless legs syndrome and periodic limb movement disorder. *Sleep* 1999; 22:961-8
418. Wisor JP, Nishino S, Sora I, Uhl GH, Mignot E, Edgar DM: Dopaminergic role in stimulant-induced wakefulness. *J Neurosci* 2001; 21:1787-94
419. Rye DB, Bliwise DL, Dhenia B, Gurecki P: Daytime sleepiness in Parkinson's disease. *J Sleep Res* 2000; 9:63-9
420. Maloney KJ, Mainville L, Jones BE: c-Fos expression in dopaminergic and GABAergic neurons of the ventral mesencephalic tegmentum after paradoxical sleep deprivation and recovery. *Eur J Neurosci* 2002; 15:774-8
421. Feenstra MGP, Botterblom MHA, Mastenbroek S: Dopamine and noradrenaline efflux in the prefrontal cortex in the light and dark period: Effects of novelty and handling and comparison to the nucleus accumbens. *Neuroscience* 2000; 100:741-7
422. Peyron C, Tighe DK, van den Pol AN, de Lecea L, Heller HC, Sutcliffe JG, Kilduff TS: Neurons containing hypocretin (orexin) project to multiple neuronal systems. *J Neurosci* 1998; 18:9996-10015
423. Kilduff TS, Peyron C: The hypocretin/orexin ligand-receptor system: Implications for sleep and sleep disorders. *Trends Neurosci* 2000; 23:359-65
424. Chemelli RM, Willie JT, Sinton CM, Elmquist JK, Scammell T, Lee C, Richardson JA, Williams SC, Xiong Y, Kisanuki Y, Fitch TE, Nakazato N, Hammer RE, Saper CB, Yanagisawa M: Narcolepsy in orexin knockout mice: Molecular genetics of sleep regulation. *Cell* 1999; 98:437-51
425. Lin L, Faraco J, Li R, Kadotani H, Rogers W, Lin X, Qiu X, de Jong P, Nishino S, Mignot E: The sleep disorder canine narcolepsy is caused by a mutation in the hypocretin (orexin) receptor 2 gene. *Cell* 1999; 98:365-76
426. Thannickal T, Moore RY, Nienhuis R, Ramanathan L, Gulyani S, Aldrich M, Cornford M, Siegel JM: Reduced number of hypocretin neurons in human narcolepsy. *Neuron* 2000; 27:469-74
427. Hara J, Beuckmann CT, Nambu T, Willie JT, Chemelli RM, Sinton CM, Sugiyama F, Yagami K, Goto K, Yanagisawa M, Sakurai T: Genetic ablation of orexin neurons in mice results in narcolepsy, hypophagia, and obesity. *Neuron* 2001; 30:345-54
428. Kiyashchenko LI, Milevskiy BY, Lai YY, Siegel JM: Increased and decreased muscle tone with orexin (hypocretin) microinjections in the locus coeruleus and pontine inhibitory area. *J Neurophysiol* 2001; 85:2008-16
429. Peever JH, Lai YY, Siegel JM: Excitatory effects of hypocretin-1 (Orexin-A) in the trigeminal motor nucleus are reversed by NMDA antagonism. *J Neurophysiol* 2003; 89:2591-600
430. Fung SJ, Manzoni D, Chan JY, Pompeiano O, Barnes CD: Locus coeruleus control of spinal motor output. *Prog Brain Res* 1991; 88:395-409
431. Hirota K, Kushikata T, Kudo M, Kudo T, Lambert DG, Matsuki A: Orexin A and B evoke noradrenaline release from rat cerebrocortical slices. *Br J Pharmacol* 2001; 134:1461-6
432. Bourgin P, Huitron-Resendiz S, Spier AD, Fabre V, Morte B, Criado JR, Sutcliffe JG, Henriksen SJ, de Lecea L: Hypocretin-1 modulates rapid eye movement sleep through activation of locus coeruleus neurons. *J Neurosci* 2000; 20:7760-5
433. Thakkar MM, Ramesh V, Strecker RE, McCarley RW: Microdialysis perfusion of orexin-A in the basal forebrain increases wakefulness in freely behaving rats. *Arch Ital Biol* 2001; 139:313-28
434. Yasuda Y, Takeda A, Fukuda S, Suzuki H, Ishimoto M, Mori Y, Eguchi H, Saitoh R, Fujihara H, Honda K, Higuchi T: Orexin A elicits arousal electroencephalography without sympathetic cardiovascular activation in isoflurane anesthetized rats. *Anesth Analg* 2003; 97:1663-6
435. Kushikata T, Hirota K, Yoshida H, Kudo M, Lambert DG, Smart D, Jerman JC, Matsuki A: Orexinergic neurons and barbiturate anesthesia. *Neuroscience* 2003; 121:855-63
436. Ziegler S, Tsusaki BE, Collard CD: Influence of genotype on perioperative risk and outcome. *ANESTHESIOLOGY* 2003; 99:212-9
437. Yaksh TL: Preclinical work leading to the development of spinal analgesia. *ANESTHESIOLOGY* 2003; 99:224-5
438. Koblin DD, Dong DE, Deady J, Eger EI: Selective breeding alters murine resistance to nitrous oxide without alteration in synaptic membrane lipid composition. *ANESTHESIOLOGY* 1980; 52:401-7
439. Mouse Genome Sequencing Consortium: Initial sequencing and comparative analysis of the mouse genome. *Nature* 2002; 420:520-62
440. Svenson KL, Bogue MA, Peters LL: Identifying new mouse models of cardiovascular disease: A review of high-throughput screens of mutagenized and inbred strains. *J Appl Physiol* 2003; 94:1650-9
441. Bogue C: Functional genomics in the mouse: Powerful techniques for unraveling the basis of human development and disease. *J Appl Physiol* 2003; 94:2502-9
442. Tobler I, Deboer T, Fischer M: Sleep and sleep regulation in normal and prion protein-deficient mice. *J Neurosci* 1997; 17:1869-79
443. Tobler I, Kopp C, Deboer T, Rudolph U: Diazepam-induced changes in sleep: Role of the  $\alpha 1$  GABA<sub>A</sub> receptor subtype. *Proc Natl Acad Sci U S A* 2001; 98:6464-9
444. Tafti M, Franken P: Genetic dissection of sleep. *J Appl Physiol* 2002; 92:1339-47
445. Katzenberg D, Young T, Finn L, Lin L, King DP, Takahashi JS, Mignot E: A CLOCK polymorphism associated with human diurnal preference. *Sleep* 1998; 21:569-76
446. Toth KL, Jones CR, He Y, Eide EJ, Hinz WA, Virshup DM, Ptacek LJ, Fu YH: An hPer2 phosphorylation site mutation in familial advanced sleep phase syndrome. *Science* 2001; 291:1040-3
447. Sonner JM, Gong D, Eger EI: Naturally occurring variability in anesthetic potency among inbred mouse strains. *Anesth Analg* 2000; 91:720-6
448. Cirelli C, Bushey D, Hill S, Huber R, Kreber R, Ganetzky R, Tononi G: Reduced sleep in drosophila shaker mutants. *Nature* 2005; 434:1087-92
449. Douglas CL, Bowman GN, Baghdoyan HA, Lydic R: C57BL/6J and B6.V-L<sup>EP</sup><sup>OB</sup> mice differ in the cholinergic modulation of sleep and breathing. *J Appl Physiol* 2005; 98:918-29
450. Day JC: Population Projections of the United States by Age, Sex, Race, and Hispanic Origin: 1995-2000. Washington, D.C., U.S. Bureau of the Census, 1996, pp 25-1130
451. Van Cauter E, Leproult R, Plat L: Age-related changes in slow wave sleep and REM sleep and relationship with growth hormone and cortisol levels in healthy men. *JAMA* 2000; 284:861-8
452. Giron MST, Forsell Y, Bernsten C, Thorslund M, Winblad B, Fastbom J: Sleep problems in a very old population: Drug use and clinical correlates. *J Gerontol A Biol Sci Med Sci* 2002; 57:M236-40
453. Phillips B, Ancoli-Israel S: Sleep disorders in the elderly. *Sleep Medicine* 2000; 2:99-114
454. Parikh SS, Chung F: Postoperative delirium in the elderly. *Anesth Analg* 1995; 80:1223-32
455. Roche V: Etiology and management of delirium. *Am J Med Sci* 2003; 325:20-30
456. Scarpini E, Scheltens P, Feldman H: Treatment of Alzheimer's disease: Current status and new perspectives. *Lancet Neurol* 2003; 2:539-47
457. Zakriya K, Sieber FE, Christmas C, Wenz JF, Franckowiak S: Brief post-operative delirium in hip fracture patients affects functional outcome at three months. *Anesth Analg* 2004; 98:1798-802
458. Plum F, Posner JB: Diagnosis of Stupor and Coma, 3rd edition. Philadelphia, FA Davis, 1980, pp 1-373
459. Abelson P, Kennedy D: The obesity epidemic (editorial). *Science* 2004; 304:1413
460. Conway B, Rene A: Obesity as a disease: No lightweight matter. *Obes Rev* 2004; 5:145-51
461. Adams JP, Murphy PG: Obesity in anaesthesia and intensive care. *Br J Anaesth* 2000; 85:91-108
462. Hasler G, Buysse DJ, Klaghofer R, Gamma A, Ajdacic V, Eich D, Rossler W, Angst J: The association between short sleep duration and obesity in young adults: A 13-year prospective study. *Sleep* 2004; 27:661-6
463. Benumof JL: Obstructive sleep apnea in the adult obese patient: Implications for airway management. *J Clin Anesth* 2001; 13:144-56
464. Hillman DR, Platt PR, Eastwood PR: The upper airway during anaesthesia. *Br J Anaesth* 2003; 91:31-9
465. Opp MR: Fever, body temperature, and levels of arousal, *Handbook of Behavioral State Control*. Edited by Lydic R, Baghdoyan HA. Boca Raton, Florida, CRC, 1999, pp 623-40
466. Toth LA, Verhulst SJ: Strain differences in sleep patterns of healthy and influenza-infected inbred mice. *Behav Gen* 2003; 33:325-36
467. Kabon B, Nagele A, Reddy D, Eagon C, Fleshman JW, Sessler DI, Kurz A: Obesity decreases perioperative tissue oxygenation. *ANESTHESIOLOGY* 2004; 100:274-80
468. Finkelstein EA, Fiebelkorn IC, Wang G: State-level estimates of annual medical expenditures attributable to obesity. *Obes Res* 2004; 12:18-24
469. Myers J, Prakash M, Froelicher V, Do D, Partington S, Atwood JE: Exercise capacity and mortality among men referred for exercise testing. *N Engl J Med* 2002; 346:793-801
470. Flier JS: Obesity wars: Molecular progress confronts an expanding epidemic. *Cell* 2004; 116:337-50
471. Ip MSM, Lam KSL, Ho C, Tsang KWT, Lam W: Serum leptin and vascular risk factors in obstructive sleep apnea. *Chest* 2000; 118:580-6
472. Boutin P, Froguel P: Genetics of human obesity. *Best Pract Res Clin Endocrinol Metab* 2001; 15:391-404
473. Patel SR, Palmer LJ, Larkin EK, Jenny NS, White DP, Redline S: Relationship between obstructive sleep apnea and diurnal leptin rhythms. *Sleep* 2004; 27:235-9
474. Wisloff U, Najjar SM, Ellingsen O, Haram PM, Swoap S, Al-Share Q, Fernstrom M, Rezaei K, Lee JL, Koch LG, Britton SL: Cardiovascular risk factors emerge after artificial selection for low aerobic capacity. *Science* 2005; 307:418-20
475. Turek FW, Joshi C, Kohsaka A, Lin E, Ivanova G, McDearmon E, Laposky A, Losee-Olson S, Easton A, Jensen DR, Eckel RH, Takahashi JS, Bass F: Obesity

- and metabolic syndrome in circadian CLOCK mutant mice. *Science* 2005; 308: 1043-5
476. Tankersley CG, Kleeborg S, Russ B, Schwartz AR, Smith PL: Modified control of breathing in genetically obese (ob/ob) mice. *J Appl Physiol* 1996; 81:716-23
477. O'Donnell CP, Shaub CD, Haines AS, Berkowitz DE, Tankersley CG, Schwartz AR, Smith PL: Leptin prevents respiratory depression in obesity. *Am J Respir Crit Care Med* 1999; 159:1477-84
478. Stricker-Krongrad A, Richy S, Beck B: Orexins/hypocretins in the ob/ob mouse: Hypothalamic gene expression, peptide content and metabolic effects. *Reg Peptides* 2002; 104:11-20
479. Polotsky VP, Smaldone MC, Scharf MT, Li J, Tankersley CG, Smith PL, Schwartz AR, O'Donnell CP: Impact of interrupted leptin pathway on ventilatory control. *J Appl Physiol* 2004; 96:991-8
480. Berman AL: *The Brain Stem of the Cat*. Madison, University of Wisconsin Press, 1968, pp 1-175
481. Callaway CW, Lydic R, Baghdoyan HA, Hobson JA: Pontogeniculooccipital waves: Spontaneous visual system activity during rapid eye movement sleep. *Cell Mol Neurobiol* 1987; 7:105-49
482. Lydic R, Baghdoyan HA, Wertz R, White DP: Cholinergic reticular mechanisms influence state-dependent ventilatory response to hypercapnia. *Am J Physiol* 1991; 261:R738-46
483. Steriade M: Acetylcholine systems and rhythmic activities during the waking-sleep cycle. *Prog Brain Res* 2004; 145:179-96
